# Supplementary material for: Persistence with dual antiplatelet therapy after percutaneous coronary intervention for ST-segment elevation acute coronary syndrome: a population-based cohort study in Catalonia (Spain)
Source: PubMed Central journal article supplement — BMJ Open. 2019 Jul 23;9(7):e028114. doi: 10.1136/bmjopen-2018-028114 (PMC6661631; doi:10.1136/bmjopen-2018-028114), 2019-07-23
Supplement: bmjopen-2018-028114.draft_revisions.pdf [file bmjopen-2018-028114.draft_revisions.pdf]

# BMJ Open

BMJ Open is committed to open peer review. As part of this commitment we make the peer review history of every article we publish publicly available.

When an article is published we post the peer reviewers' comments and the authors' responses online. We also post the versions of the paper that were used during peer review. These are the versions that the peer review comments apply to.

The versions of the paper that follow are the versions that were submitted during the peer review process. They are not the versions of record or the final published versions. They should not be cited or distributed as the published version of this manuscript.

BMJ Open is an open access journal and the full, final, typeset and author-corrected version of record of the manuscript is available on our site with no access controls, subscription charges or pay-per-view fees (<http://bmjopen.bmj.com>).

If you have any questions on BMJ Open's open peer review process please email [info.bmjopen@bmj.com](mailto:info.bmjopen@bmj.com)

# BMJ Open

## Persistence with dual antiplatelet therapy after percutaneous coronary intervention for ST-Segment-Elevation Acute Coronary Syndrome. A population-based cohort study

|                               |                                                                                                                                                                                                                                                                                                                                                                                                                                                                                                                                                                                                                                                                                                                                                                                                                                                                                                                                                                                                                                                                                                                                                                                                                                                                                                                                                                                                                                                                                                                  |
|-------------------------------|------------------------------------------------------------------------------------------------------------------------------------------------------------------------------------------------------------------------------------------------------------------------------------------------------------------------------------------------------------------------------------------------------------------------------------------------------------------------------------------------------------------------------------------------------------------------------------------------------------------------------------------------------------------------------------------------------------------------------------------------------------------------------------------------------------------------------------------------------------------------------------------------------------------------------------------------------------------------------------------------------------------------------------------------------------------------------------------------------------------------------------------------------------------------------------------------------------------------------------------------------------------------------------------------------------------------------------------------------------------------------------------------------------------------------------------------------------------------------------------------------------------|
| Journal:                      | <i>BMJ Open</i>                                                                                                                                                                                                                                                                                                                                                                                                                                                                                                                                                                                                                                                                                                                                                                                                                                                                                                                                                                                                                                                                                                                                                                                                                                                                                                                                                                                                                                                                                                  |
| Manuscript ID                 | bmjopen-2018-028114                                                                                                                                                                                                                                                                                                                                                                                                                                                                                                                                                                                                                                                                                                                                                                                                                                                                                                                                                                                                                                                                                                                                                                                                                                                                                                                                                                                                                                                                                              |
| Article Type:                 | Research                                                                                                                                                                                                                                                                                                                                                                                                                                                                                                                                                                                                                                                                                                                                                                                                                                                                                                                                                                                                                                                                                                                                                                                                                                                                                                                                                                                                                                                                                                         |
| Date Submitted by the Author: | 26-Nov-2018                                                                                                                                                                                                                                                                                                                                                                                                                                                                                                                                                                                                                                                                                                                                                                                                                                                                                                                                                                                                                                                                                                                                                                                                                                                                                                                                                                                                                                                                                                      |
| Complete List of Authors:     | Ribera, Aida; University Hospital Vall d'Hebron, Cardiology<br>Ferreira-Gonzalez, Ignacio; University Hospital Vall d'Hebron, Cardiology<br>Marsal, Josep Ramon; University Hospital Vall d'Hebron, Cardiology<br>Oristrell, Gerard; University Hospital Vall d'Hebron, Cardiology<br>Faixedas, Maria Teresa; Servei Català de la Salut, Catalonia, Spain<br>Rosas, Alba; 4. Departament de Salut, Generalitat de Catalunya<br>Tizón-Marcos, Helena; 5. Cardiology Department, Hospital del Mar, and Heart Diseases Biomedical Research Group and IMIM (Hospital del Mar Medical Research Institute), and Faculty of Medicine, Universitat Autònoma de Barcelona<br>Rojas, Sergio; 6. Cardiology Department, Hospital Universitari de Tarragona Joan XXIII, IISPV, and Universidad Rovira Virgili<br>Labata, Carlos; Cardiology Department, Hospital German Tries i Pujol<br>Cardenas, Merida; Cardiology Department, Hospital Josep Trueta<br>Homs, Silvia; Cardiology Department, Hospital Mútua de Terrassa<br>Tomas-Querol, Carlos; Cardiology Department, Hospital Arnau de Villanova<br>Garcia-Picart, Joan; 11. Cardiology Department, Hospital de la Santa Creu i Sant Pau<br>Gomez-Hospital, Joan; Cardiology Department, Hospital de Bellvitge<br>Pijoan, Jose; BioCruces Health Research Institute<br>Masotti, Monica; Cardiology Department, Hospital Clínic<br>Mauri, Josepa; Departament de Salut, Generalitat de Catalunya<br>Garcia Dorado, David; University Hospital Vall d'Hebron, Cardiology |
| Keywords:                     | dual antiplatelet therapy, adherence, ST-elevation myocardial infarction, percutaneous coronary intervention                                                                                                                                                                                                                                                                                                                                                                                                                                                                                                                                                                                                                                                                                                                                                                                                                                                                                                                                                                                                                                                                                                                                                                                                                                                                                                                                                                                                     |

SCHOLARONE™  
Manuscripts

1  
2  
3 **Persistence with dual antiplatelet therapy after percutaneous coronary intervention**  
4 **for ST-Segment-Elevation Acute Coronary Syndrome. A population-based cohort**  
5 **study**  
6  
7  
8  
9

10 Aida Ribera<sup>1,2</sup>, PhD; Ignacio Ferreira-González<sup>1,2</sup>, MD PhD; Josep Ramon Marsal<sup>1,2</sup>, Bsc;  
11 Gerard Oristrell<sup>1,2</sup>, MD Maria Teresa Faixedas<sup>3</sup>, MD; Alba Rosas<sup>4</sup>, PhD; Helena Tizón-  
12 Marcos<sup>5</sup>, MD; Sergio Rojas<sup>6</sup>, MD; Carlos Labata<sup>7</sup>, MD; Mérida Cárdenas<sup>8</sup>, MD; Silvia  
13 Homs<sup>9</sup>, MD; Carlos Tomás-Querol<sup>10</sup>, MD; Joan Garcia-Picart<sup>11</sup>, MD; Joan A. Gomez-  
14 Hospital<sup>12</sup>, MD, PhD; Jose Ignacio Pijoan<sup>2,13</sup>, MD PhD; Monica Masotti<sup>14</sup>, MD; Josepa  
15 Mauri<sup>4,7</sup>, MD PhD; David García-Dorado<sup>1</sup>, MD PhD  
16  
17  
18  
19  
20  
21  
22  
23  
24

25 On behalf of the VESA Study and Codi IAM Investigators  
26

- 27 1. Cardiology Department, Vall d'Hebrón Hospital, Vall d'Hebron Research  
28 Institute (VHIR) and Universitat Autònoma de Barcelona. Barcelona, Spain  
29
- 30 2. CIBER de Epidemiología y Salud Pública (CIBERESP). Spain  
31
- 32 3. Servei Català de la Salut, Catalonia, Spain  
33
- 34 4. Departament de Salut, Generalitat de Catalunya, Catalonia, Spain.  
35
- 36 5. Cardiology Department, Hospital del Mar, and Heart Diseases Biomedical  
37 Research Group and IMIM (Hospital del Mar Medical Research Institute), and  
38 Faculty of Medicine, Universitat Autònoma de Barcelona. Spain  
39
- 40 6. Cardiology Department, Hospital Universitari de Tarragona Joan XXIII, IISPV,  
41 and Universidad Rovira Virgili. Tarragona. Spain.  
42
- 43 7. Cardiology Department, Hospital German Tries i Pujol. Barcelona. Spain.  
44
- 45 8. Cardiology Department, Hospital Josep Trueta. Girona. Spain.  
46
- 47 9. Cardiology Department, Hospital Mútua de Terrassa. Bcelona. Spain.  
48
- 49 10. Cardiology Department, Hospital Arnau de Villanova. Lleida. Spain.  
50  
51  
52  
53  
54  
55  
56  
57  
58  
59  
60

1  
2  
3 11. Cardiology Department, Hospital de la Santa Creu i Sant Pau. Barcelona. Spain.  
4

5 12. Cardiology Department, Hospital de Bellvitge. Barcelona. Spain  
6

7  
8 13. BioCruces Health Research Institute, Bilbao. Spain  
9

10 14. Cardiology Department, Hospital Clínic, Barcelona. Spain.  
11  
12  
13  
14  
15

16 **Corresponding author**

17  
18  
19 Ignacio Ferreira-González. Cardiovascular Epidemiology Unit. Cardiology Department.  
20

21 University Hospital Vall d'Hebron. Psg. Vall d'Hebron, 119-129 08035 Barcelona. Spain  
22

23  
24 [nachoferreira@secardiologia.es](mailto:nachoferreira@secardiologia.es)  
25

26  
27 tel. 932746177  
28  
29  
30

31 **Word count:** 3462  
32

33  
34 **Keywords:** dual antiplatelet therapy, adherence, ST-elevation myocardial infarction,  
35  
36 percutaneous coronary intervention  
37  
38  
39  
40  
41  
42  
43  
44  
45  
46  
47  
48  
49  
50  
51  
52  
53  
54  
55  
56  
57  
58  
59  
60

**ABSTRACT**

**Objectives:** International guidelines recommending dual antiplatelet therapy (DAPT) 12 months in patients with ST-elevation acute coronary syndrome (STEACS) undergoing percutaneous coronary intervention (PCI) were published in year 2012. The aims of the study were to describe trends in 12-month persistence with DAPT between 2010 and 2015 and to evaluate its relationship with variability in the recommended DAPT duration among PCI hospitals.

**Design:** Observational study based on region-wide registry data linked to pharmacy billing data for DAPT follow up.

**Setting.** All PCI hospitals (10) belonging to the AMI-Code network in Catalonia (Spain)

**Participants:** 10,711 STEACS patients undergoing PCI between 2010 and 2015 were followed up.

**Primary and secondary outcome measures:** Primary outcome was at least 12 month persistence with DAPT throughout the study period. 12-months recommendation of DAPT in the hospital discharge report and interhospital variability in the rate of 12-month recommendation were defined as secondary outcomes.

**Results:** The proportion of patients on-DAPT at 12 months increased from 58% (56-60) in 2010 to 73% (71-75) in 2015. Interhospital variability in the rate of 12-month recommendation decreased from ICC 69% (42-87) in 2010 to 37% (18-61) in 2015. Recommending 12 months DAPT at discharge from the PCI hospital was a major determinant of adherence to the 12-month schedule, OR=6.28 (5.28-7.47).

**Conclusion:** Adherence to 12-month DAPT has increased since publication of clinical guidelines. Even though most patients were discharged on DAPT, only 73% with potential indication were on-DAPT 12 months after PCI. A guideline-based

1  
2  
3 recommendation at PCI hospital discharge had a substantial impact on persistence  
4  
5 with DAPT. Establishing evidence-based, common prescribing criteria across hospitals  
6  
7  
8 in the AMI-network would favour adherence and reduce variability.  
9  
10  
11  
12

### 13 **Strengths and limitations of this study**

- 14  
15  
16 • The study describes the trends in persistence with DAPT during 2010-2015 in a  
17  
18 region-wide unselected comprehensive cohort of patients using administrative  
19  
20 data linked to a clinical registry  
21  
22
- 23  
24 • It also evaluates the impact of the DAPT duration recommended at the PCI  
25  
26 hospital discharge on 12-months persistence  
27  
28
- 29  
30 • Limitations of using observational registry data include the possibility of coding  
31  
32 errors and the inability to accurately identify specific contraindications for  
33  
34 treatment or other patient characteristics that might be relevant for the study  
35  
36 aims  
37
- 38  
39 • The use of pharmacy refill data as a proxy of patients adherence and  
40  
41 persistence has also limitations which have been extensively described  
42  
43  
44  
45

### 46 **Study funding**

47  
48  
49 The study was supported by Instituto de Salud Carlos III grand number PI13/00399 and  
50  
51 the Fundació la Marató de TV3 grand number 430/U/2015. The funders did not have  
52  
53 any role in the study design and development.  
54  
55  
56

### 57 **Competing interest statement**

1  
2  
3 All authors have completed the ICMJE uniform disclosure form at  
4 [http://www.icmje.org/coi\\_disclosure.pdf](http://www.icmje.org/coi_disclosure.pdf) and declare: no support from any  
5  
6  
7  
8 organisation for the submitted work; no financial relationships with any organisations  
9  
10 that might have an interest in the submitted work in the previous three years, no other  
11  
12 relationships or activities that could appear to have influenced the submitted work  
13  
14  
15  
16  
17  
18  
19  
20  
21  
22  
23  
24  
25  
26  
27  
28  
29  
30  
31  
32  
33  
34  
35  
36  
37  
38  
39  
40  
41  
42  
43  
44  
45  
46  
47  
48  
49  
50  
51  
52  
53  
54  
55  
56  
57  
58  
59  
60

For peer review only

## Introduction

The need of dual antiplatelet therapy (DAPT) combining aspirin and an ADP-receptor blocker for at least 12 months in patients with ST-elevation acute coronary syndrome (STEACS) undergoing percutaneous coronary intervention (PCI) is well established and was incorporated into clinical guidelines in 2012[1,2].

Adherence of patients to this strategy is crucial to ensure its efficacy. Adherence to medication is usually defined[3] as the extent to which patients take medications as prescribed by their health care providers and persistence is defined as time from initiation to discontinuation of a therapy. Patients' persistence with DAPT may be influenced by several factors but will depend strongly on whether they ultimately receive a correct prescription from their physicians in the primary care setting. Patients may receive recommendations from various health providers at different stages of their process of care, from the interventionist cardiologist to their primary physician. It could be hypothesized that the last would tend to relay on the recommendation of the more specialized health professional. Thus, one potential determinant of patient's persistence with DAPT for at least 12 months is the instructions provided in the discharge report of the hospital where the patient was attended during the acute phase.

In Catalonia, an autonomous region of Spain, the acute care of STEACS is organized through a region-wide network, the Acute Myocardial Infarction (AMI) Code, to derive patients with suspected STEACS to one of the 10 reference hospitals with PCI capability. Performance of the AMI Code is prospectively and exhaustively registered[4,5], providing an appropriate tool for quality evaluation. The Catalan



1  
2  
3 Health Information System systematically registers, among other, data on pharmacy  
4 refills. Pharmacy billing data, although indirect, is an accepted method for evaluating  
5 persistence with treatment in large patient cohorts[3,6].  
6  
7  
8  
9

10 The aims of the present study were: first, to describe persistence with DAPT in patients  
11 with STEACS undergoing PCI from 2010 to 2015; second, to evaluate the impact of the  
12 DAPT duration recommended at the PCI hospital discharge on patients' persistence  
13 with treatment for at least 12 months as recommended in clinical guidelines. As a main  
14 determinant of persistence, determinants and variability of discharge recommendation  
15 patterns will be also analysed as a secondary objective.  
16  
17  
18  
19  
20  
21  
22  
23  
24  
25  
26

## 27 **Methods**

### 28 *Data sources*

29  
30  
31 Data were obtained through the Public Data Analysis for Health Research and  
32 Innovation Program (PADRIS). The PADRIS allows access to information from different  
33 sources on public healthcare usage for the population of Catalonia linked at the  
34 patient level with warranted accomplishment of ethical principles. Specifically, for the  
35 present study we linked data of the pharmacy billing registry with the AMI Code  
36 Registry. The AMI Code registry was launched in 2010 to evaluate performance of the  
37 AMI Code [4,5]. Exhaustiveness and quality of data is assessed periodically (see  
38 supplemental methods for details). The database belongs to the Catalan Department  
39 of Health and includes demographic, clinical, and therapeutic data. It conforms to the  
40 ethical and legal requirements for research purposes. The study obtained ethics  
41 approval from the Vall d'Hebron Clinical Research Ethics Committee.  
42  
43  
44  
45  
46  
47  
48  
49  
50  
51  
52  
53  
54  
55  
56  
57  
58  
59  
60

1  
2  
3 The registry was completed for the purpose of the present analysis with retrospective  
4 collection of additional specific data: diseased vessels, responsible vessel, stent type,  
5  
6 number of stents. The recommendation of antithrombotic drugs was also collected *ad*  
7  
8 *hoc* for the study from the discharge report. The recommendation of DAPT was  
9  
10 defined as the recommendation of Acetylsalicylic acid (ASA) and either clopidogrel,  
11  
12 prasugrel or ticagrelor for specified periods. If the recommended duration of DAPT was  
13  
14 not specified, the discharge recommendation pattern was classified as “unspecified”. A  
15  
16 local investigator at each center performed the specific retrospective data collection.  
17  
18 History of major haemorrhage, neoplasia, renal disease, heart failure, peripheral  
19  
20 arterial disease and atrial fibrillation, were obtained from minimum basic data set  
21  
22 (MBDS) diagnoses coded in hospitalization episodes occurring in the previous three  
23  
24 months before index hospitalization. Major haemorrhage was defined as: a diagnosis  
25  
26 of digestive bleeding in any diagnostic position (primary or secondary) together with a  
27  
28 procedure code for endoscopic treatment or for transfusion of blood products, or a  
29  
30 diagnosis of haemorrhagic stroke, or a diagnosis of intraocular haemorrhage, or a  
31  
32 diagnosis of other types of haemorrhage together with a procedure code for  
33  
34 transfusion of blood products. Major ischemic events (AMI or stroke) and major  
35  
36 haemorrhage during the 12 months following the index episode were obtained in the  
37  
38 same way. Mortality during the 12 months following the index episode was obtained  
39  
40 from the insured registry status.  
41  
42  
43  
44  
45  
46  
47  
48  
49  
50

51  
52  
53 Drug treatment during the 12-month post-discharge follow up was obtained from the  
54  
55 pharmacy billing registry. ICD9 and ATC codes used for the identification of study  
56  
57 variables are listed in the supplemental tables.  
58  
59  
60

### ***Study population***

All consecutive patients who survived a STEACS between January 2010 and December 2015, received primary or post fibrinolysis PCI in one of the 10 reference hospitals of the AMI Code network and were discharged alive and/or survived at least one month after AMI with a discharge report providing instructions on treatment prescriptions were included. New episodes of STACS occurring to the same patients during the study period were only accounted as follow up events. Patients with likely contraindication for dual antiplatelet therapy (history of bleeding or neoplasm in the three months prior to the index episode and patients requiring anticoagulation) were excluded.

### ***Persistence with treatment***

DAPT was defined as the concomitant use of ASA and a P2Y<sub>12</sub> antagonist. Persistence with DAPT was estimated by identification of consecutive months with pharmacy refills with one container of each agent in the 12-month period after hospital discharge. Because pharmacy billing is registered in a monthly basis and the exact day of dispensation is unknown, we considered that a monthly dispensation until at least month 11 after the index episode would approximate a 12-months treatment period. If more than one container were dispensed in one month, the excess containers were pulled along the following months. Non-persistence was defined as either discontinuation or a break in therapy of at least two months after pulling along the excess containers. To describe persistence over the whole study period we estimated the proportion of patients alive who were on treatment on each month[7].

1  
2  
3 The first primary outcome was a patients' persistence with DAPT for 12 months  
4 following discharge (or in other words, patients withdrawing both agents from the  
5 pharmacy until at least month 11).  
6  
7  
8  
9

### 10 11 12 ***Statistical analysis***

13  
14  
15 To evaluate trends in 12 months persistence with DAPT we included the calendar year  
16 when the patient was discharged in logistic regression models. To evaluate the impact  
17 of the DAPT duration recommended in the discharge report, we included the  
18 recommendation pattern ( $\leq 1$  month, 2 to 11 months,  $\geq 12$  months or unspecified) in a  
19 second step.  
20  
21  
22  
23  
24  
25  
26

27 Additionally, we assessed the determinants (including calendar year of the episode) of  
28 a DAPT recommendation for at least 12 months with logistic regression models.  
29  
30  
31

32 In both sets of analyses we took into account the clustered structure of data with  
33 patients being treated and, most importantly, with medications being recommended  
34 in different hospitals, by introducing random effects in the logistic regression models.  
35  
36  
37  
38

39 As recommendation is subject to interhospital variability we estimated variability  
40 measures for random effects. We tested whether models including random intercept  
41 for hospital and random slopes for each independent variable were significant using a  
42 deviance –based test of hypothesis.  
43  
44  
45  
46  
47  
48

49 Variable selection for multilevel modelling was based on the bivariate associations  
50 with the rate of each dependent variable. Candidate individual variables were those  
51 described in tables 1 and 3. Type of antiplatelet drug was not included in the  
52 multivariable analysis because it was highly correlated with the year of episode, as new  
53 antiplatelet agents (ticagrelor and prasugrel) were introduced later during the study  
54  
55  
56  
57  
58  
59  
60

1  
2  
3 period. We retained in the final model all variables with a p value<0.2 for the bivariate  
4  
5 association with the dependent variable.  
6  
7

8 To measure the magnitude of hospital level variance in the odds of patients being  
9  
10 recommended DAPT for at least 12 months we estimated the intraclass correlation  
11  
12 (ICC) and the median odds ratio (MOR) for multilevel logistic models. The ICC can be  
13  
14 interpreted as the proportion of total variance in the outcome that is attributable to  
15  
16 the hospital level variability. The MOR is defined as the median value of the odds ratio  
17  
18 between the hospital at higher risk and the hospital at lower risk when randomly  
19  
20 picking out two hospitals. In the present study, the MOR estimates the extent to which  
21  
22 the individual odds of being recommended DAPT for 12 months is determined by the  
23  
24 hospital where the procedure is performed. If the MOR equals one, there would be no  
25  
26 differences between hospitals. If the MOR is large, hospital differences are relevant to  
27  
28 understand variations in individual probability of receiving a 12-month  
29  
30 recommendation.  
31  
32  
33  
34  
35

36  
37 Multilevel logistic regression models were estimated assuming independent  
38  
39 covariances using the xtmelogit procedure in STATA 14. Methods and formulas to  
40  
41 compute indexes of interhospital variability and different measures of clustering were  
42  
43 obtained from Merlo et al[8].  
44  
45  
46  
47  
48

### 49 ***Sensitivity analyses***

50  
51 As a substantial proportion of patients were returned to their reference hospital and  
52  
53 whether the DAPT duration recommendation was changed at discharge from the  
54  
55 second hospital was unknown, we performed sensitivity analyses excluding these  
56  
57 patients. Additionally, because ischemic and haemorrhagic events occurring during  
58  
59  
60

1  
2  
3 follow up would change the prescription pattern, sensitivity analyses were also  
4  
5 performed by excluding patients suffering any vascular event during follow up.  
6  
7  
8  
9

## 10 **Results**

11  
12 After excluding patients with likely contraindication for, we identified 10,711 STEACS  
13  
14 patients undergoing PCI who were potential candidates to receive DAPT for at least 12  
15  
16 months and were discharged alive from the PCI hospitals or survived for at least one  
17  
18 month (Figure 1). 631 (5.9%) patients experienced an ischemic major event (AMI or  
19  
20 stroke) within 12 months after the index episode, 100 (0.9%) had a major  
21  
22 haemorrhage and 280 (2.6%) died between one and 12 months after the index  
23  
24 episode.  
25  
26  
27  
28

29  
30 The rate of patients on-DAPT after discharge was 91% (95% CI: 90-91) without relevant  
31  
32 differences between years (figure 2). Persistence with DAPT for 12 months significantly  
33  
34 increased from 58% (56-61) in 2010 to 73% (71-75) in 2015. The larger increase in 12-  
35  
36 month persistence was observed between 2014 (64% [62-66]) and 2015, two years  
37  
38 after the publication of clinical guidelines. There was a growing rate of prasugrel and  
39  
40 ticagrelor dispensation along the study period (figure 3).  
41  
42  
43  
44

45 Table 1 shows characteristics of study patients depending on persistence with DAPT  
46  
47 for one month or less, 2 to 11 months or 12 months or more. The majority (76%) of  
48  
49 patients (4740/6272) with an explicit recommendation of 12 months DAPT or more at  
50  
51 PCI hospital discharge were on-DAPT at 12 months. This proportion was only 27%  
52  
53 (462/1735) in the subgroup of patients with a shorter recommended duration. Among  
54  
55 patients without a specified recommended time at discharge from the PCI hospital,  
56  
57 60% (1399/2332) were on-DAPT at 12 months. In multivariate analysis (Table 2),  
58  
59  
60

1  
2  
3 determinants of persistence with DAPT for at least 12 months were  
4  
5 hypercholesterolemia, previous revascularization, having two or more diseased vessels  
6  
7 and left anterior coronary disease, higher number of stents implanted and receiving  
8  
9 drug eluting stents. An increased odd of persistence was observed in year 2015 but  
10  
11 this association disappeared when including the prescription pattern. A longer  
12  
13 hospital stay was related to a lower probability of 12 months persistence with DAPT.  
14  
15 As expected, having an ischaemic event would increase DAPT duration, while suffering  
16  
17 a haemorrhagic event would decrease it. Explicit instructions at the discharge report  
18  
19 of DAPT for at least 12 months was one of the major determinants of 12-month  
20  
21 persistence (OR=6.28; 95%CI: 5.28-7.47), and also patients with unspecified  
22  
23 recommendation had an increased odds of persistence as compared with patients with  
24  
25 a recommendation of less than 12 months.  
26  
27  
28  
29  
30

31  
32 Results of sensitivity analyses, excluding patients with ischemic or haemorrhagic  
33  
34 events during follow up, or excluding patients that were transferred to another centre  
35  
36 after PCI were similar to the main analysis.  
37  
38  
39

40 The rate of explicit DAPT recommendation for at least 12 months in the hospital  
41  
42 discharge reports was 51% (49-53) in 2010 and increased to 77% (75-79) in 2015  
43  
44 (supplemental figure). Interhospital variability in the rate of 12-month DAPT  
45  
46 recommendation (figure 3) was 69% (42-87) in year 2010, indicating that half of the  
47  
48 variability was due to variation between hospitals, and it decreased to 37% (18-61) in  
49  
50 2015, as indicated by the ICC calculated for each year.  
51  
52  
53

54 Table 3 shows characteristics of study patients depending on the DAPT duration  
55  
56 recommended at hospital discharge. In multivariate analysis (table 4) the strongest  
57  
58 determinant of a higher rate of recommendation for  $\geq 12$  months was receiving a drug  
59  
60

1  
2  
3 eluting stent. Other determinants were. There was also a strong increase in the rate of  
4  
5 12 months prescription in with year. For both random effect were significant, meaning  
6  
7 that the association with drug eluting stent or with year vary between hospitals. When  
8  
9 patients derived to their reference hospital were excluded results were similar.  
10  
11  
12  
13  
14

## 15 **Discussion**

16  
17 According to published guidelines, all STEACS patients undergoing PCI without  
18  
19 contraindication should be on DAPT after 12 months unless an event occurs that  
20  
21 precludes continuing with treatment. In this observational region-wide study we have  
22  
23 found an increase in the proportion of patients on-DAPT at 12 months from 58 to 73%  
24  
25 in the period from 2010 to 2015.  
26  
27  
28

29  
30 We also found a high variability between hospitals in the adherence to guidelines  
31  
32 when recommending DAPT for at least 12 months which leads to differences between  
33  
34 hospitals in the rate of patients persisting with the recommended DAPT one year time  
35  
36 span. The progressive increase in the overall rate of adherence to guidelines was  
37  
38 accompanied by a substantial reduction of interhospital variability.  
39  
40

41  
42 Adherence of patients to 12-month DAPT assessed is strongly related to the  
43  
44 instructions given at the PCI hospital discharge, as we observed a lower rate of 12-  
45  
46 month persistence in patients receiving a discharge DAPT recommendation for less  
47  
48 than 12 months. Although a causal direct relationship between the established  
49  
50 recommendation in the more specialised setting and the final prescription at the  
51  
52 primary care setting cannot be stated on the basis of observational data, this finding  
53  
54 suggests that prescribing physicians strongly rely on the first recommendation  
55  
56 specified at the discharge report in the PCI hospital. Therefore, hospital cardiologists  
57  
58  
59  
60



1  
2  
3 should be kept aware of their impact and encouraged to be clear and specific enough  
4  
5 when providing DAPT time recommendations in the discharge report form.  
6  
7

8 A number of factors have been described to contribute to underprescription[9]. The  
9  
10 recommendation of DAPT for at least 12 months following STEACS[1,2] was based on  
11  
12 the duration of follow up of randomised clinical trials designed for other purposes  
13  
14 and[10–12], although a 12-month treatment seemed reasonable [13], no randomized  
15  
16 studies have been performed to date aimed specifically at comparing 12 months DAPT  
17  
18 with shorter in STEACS patients receiving PCI and thus this recommendation might well  
19  
20 be seen as somehow arbitrary by some prescribers.  
21  
22  
23

24  
25 In 2015 the need for long term DAPT was reinforced by the recommendation of  
26  
27 extended DAPT beyond 12 months in patients with ACS receiving drug eluting  
28  
29 stents[14–16], but still safety concerns might induce some prescribers to be reluctant  
30  
31 to prolong DAPT, especially in patients with higher complexity[17]. Safety concerns  
32  
33 might also explain the high proportion of discharge reports with non-specified DAPT  
34  
35 period, which deserved special attention in our analyses. Cardiologists might be  
36  
37 reluctant to prescribe a specific duration of DAPT maybe fearing about the emergency  
38  
39 of events that increase the haemorrhagic risk at some point after discharge, thus  
40  
41 relaying on the follow up that will be made at the ambulatory setting. Our results  
42  
43 showing a high degree of persistence for patients without a specification of DAPT time  
44  
45 point out to the fact that this decision is not necessarily “incorrect”, and that health  
46  
47 providers coming later in the process of care are probably doing their job.  
48  
49  
50  
51  
52  
53

54 We might wonder whether the observed high variability between hospitals in the  
55  
56 instructions provided about DAPT duration actually reflects suboptimal quality of care  
57  
58 or confusion in the interpretation of international guidelines. In fact, although 2012  
59  
60

1  
2  
3 ESC guidelines state that DAPT must be continued for 12 months after STEACS with a  
4 class of recommendation I, the level of evidence was established as C[1]. Thus, there  
5  
6 was general agreement that a minimum of 12 months of DAPT is beneficial but based  
7  
8 only on a consensus of experts or observational studies. Moreover, it is literally stated  
9  
10 that the given recommendation on DAPT duration should be “with a strict minimum of  
11  
12  
13 1 month for patients receiving BMS and 6 months for patients receiving DES”, with  
14  
15 Class IC and IIb respectively. This, which ultimately reflects the lack of clinical trials  
16  
17 aimed to answer the specific question about DAPT duration, could have induced a  
18  
19 perception of arbitrariness leading to variability in clinical practice.  
20  
21  
22  
23

24  
25 Regardless the level of the evidence, one would expect that a Class I recommendation  
26  
27 should be uniformly followed by clinicians. Moreover, as patient characteristics did not  
28  
29 substantially differed across hospitals, we should expect a lower variability between  
30  
31 hospitals. A large variation in individual country practices concerning the pattern of  
32  
33 DAPT duration after ACS has been described, suggesting that local systems are strong  
34  
35 drivers of DAPT duration[18]. These findings may imply that there is still room for  
36  
37 improvement in the quality of care of STEACS patients and that quality improvement  
38  
39 programs, whose efficacy and cost-effectiveness are still under evaluation, could be  
40  
41 useful to reduce variability in clinical practice[19]. This is of prime importance in the  
42  
43 context of the prescription of DAPT duration after ACS in which the clinician-driven  
44  
45 variability in prescription patterns adds to the different levels patients’ adherence[18].  
46  
47  
48  
49  
50  
51 Higher atherosclerotic burden and increased ischemic risk was associated to better  
52  
53 persistence with DAPT. The need for 12-month DAPT schedules in patients treated  
54  
55 with drug eluting stents is clearly perceived by physicians but the magnitude of this  
56  
57 association varies largely between hospitals. This means that, even in clear indications,  
58  
59  
60

1  
2  
3 there are different levels of adoption of emerging clinical recommendations in  
4  
5 hospitals belonging to the same AMI network.  
6  
7

8 It is also apparent from our data that the speed of adoption of clinical guidelines is  
9  
10 different among hospitals and that an acceptable and generalised level of adherence is  
11  
12 only reached after two years of implementation. Similar trends have been found in  
13  
14 other contexts and earlier periods[20–25] reporting DAPT use between 60-80% at  
15  
16 discharge and between 25-75 % at one year. In this sense, together with other quality  
17  
18 improvement initiatives, the use of population-based registries to provide audit and  
19  
20 feedback could be useful to promote quicker and smoother adoption of clinical  
21  
22 practice guidelines[26].  
23  
24  
25  
26  
27  
28  
29

30 There are a number of assumptions that might be questionable: The complete process  
31  
32 of care and the definite prescription at the ambulatory setting is poorly known for  
33  
34 individual patients and has not been considered in this study. Changes in treatment  
35  
36 prescription might be justified by the patients' varying conditions during follow up. We  
37  
38 assume that hospital recommendation influences final prescription, and consequently,  
39  
40 final adherence, but it can also be that both "prescribers" facing the same patient  
41  
42 share the same criteria for prescription. I.e. the hospital cardiologist might have  
43  
44 decided to recommend DAPT for a shorter period to an elderly patient with other  
45  
46 comorbidities and suboptimal quality of life due to mild digestive symptoms, even if  
47  
48 her objective bleeding risk is not high; similarly, the primary physician or the  
49  
50 cardiologist at the primary care setting might have also decided to be less aggressive  
51  
52 for the same reasons, even without being influenced by the recommendation of the  
53  
54 first. This would probably explain a large amount of the strong relationship between  
55  
56  
57  
58  
59  
60

1  
2  
3 hospital recommendation and pharmacy dispensation. Moreover, although effects  
4  
5 were adjusted for patient characteristics and vascular events during follow up, there  
6  
7 might be other unmeasured reasons for deciding upon a shorter DAPT period facing an  
8  
9 individual patient.  
10  
11

12  
13 In addition, the recommendation at PCI hospital discharge may not coincide with the  
14  
15 final hospital prescription in patients derived to another reference hospital after PCI.  
16  
17 However, results of sensitivity analyses excluding these patients did not differ  
18  
19 substantially from the results of the main analyses.  
20  
21

22  
23 The study was aimed to ascertain adherence to guidelines in hospital recommendation  
24  
25 and its impact on patients' persistence with DAPT and thus, we did not measure the  
26  
27 impact of adherence in terms of clinically relevant results which will be analysed  
28  
29 further. Similarly, the study was not specifically aimed at a deep assessment of  
30  
31 determinants of adherence. This requires a detailed examination of the social context  
32  
33 and a detailed assessment of individual psychological factors[27].  
34  
35  
36  
37  
38  
39

## 40 **Conclusion**

41  
42 From 2010 to 2015 there has been a substantial increase in the rate of STEACS patients  
43  
44 persisting for at least 12 months has also increased but there is still a large variability  
45  
46 between hospitals in prescription and a substantial proportion of patients who  
47  
48 discontinue DAPT before 12 months.  
49

50  
51 We have shown that instructions given at the PCI hospital discharge strongly influence  
52  
53 persistence, thus establishing common and rational prescribing criteria between  
54  
55 hospitals in the STEACS-network may favour patients adherence and persistence with  
56  
57 scheduled prescriptions and also reduce variability in clinicians' practices.  
58  
59  
60

## Author contributions

IFG, AR, JRM conceived and designed the study; AR, JRM and MTF participated in the acquisition and analysis of data; HTM, SR, CL, MC, SH, CTQ, JGP, JAGH and MM were responsible for data acquisition in their respective hospitals; AR, IFG, JRM, GO, AR, JIP, JM and DGD were involved in the interpretation of results; AR and IFG wrote the manuscript and all other authors revised it critically and approved its final version

The AMI-Code Registry Investigators (listed below) contribute to the functioning of the AMI code and to data acquisition for the AMI-Code Registry:

C. Carvajal, P. Martínez, RM. Lidón, J. Bañeras (Hospital Universitari de la Vall d'Hebrón, Barcelona), J. Garcia-Picart (Hospital de la Santa Creu i Sant Pau, Barcelona), M. Massotti, G. Jiménez, M. Hernández, A. Regueiro (Hospital Clinic, Barcelona), J. Basaganyas, P. Loma, M. Cardenas, E. Badosa, A. Fageda (Hospital Josep Trueta, Girona) A. Ariza, C. García-Amigó, A. Cequier, A. Gómez-Hospital, G. Marín, J. Maristany, V. Montoya (Hospital Universitari de Bellvitge, Hospitalet) , C. Labata, J. Mauri, E. Fernández-Nofrerias, X. Carrillo, C. Garcia-Garcia, C. Oliete, (Hospital Universitari Germans Trias i Pujol, Badalona) A. Bardaji, G. Bonet-Pineda, S. Rojas (Hospital Joan XXIII, Tarragona). Juan F. Muñoz, F. Padilla, S. Homs (Hospital Mútua de Terrassa, Terrassa), B. Baquerizo, L. Recasens, H. Tizon-Marcos (Hospital de Mar IMAS, Barcelona), A. Bosch Gaya, F. Worner, L. Barta, M. Agustí, A. Gené (Hospital Arnau de Vilanova, Lleida), X. Jimenez, A. Mora (Sistema d'Emergencies Mèdiques SEM SA,

1  
2  
3 Barcelona), MT. Faixedas, J. Jiménez, A. Rosas (Health Department. Generalitat de  
4  
5 Catalunya).  
6  
7  
8  
9  
10  
11  
12  
13  
14  
15  
16  
17  
18  
19  
20  
21  
22  
23  
24  
25  
26  
27  
28  
29  
30  
31  
32  
33  
34  
35  
36  
37  
38  
39  
40  
41  
42  
43  
44  
45  
46  
47  
48  
49  
50  
51  
52  
53  
54  
55  
56  
57  
58  
59  
60

For peer review only

## References

- 1 Steg PG, James SK, Atar D, *et al.* ESC Guidelines for the management of acute myocardial infarction in patients presenting with ST-segment elevation: The Task Force on the management of ST-segment elevation acute myocardial infarction of the European Society of Cardiology (ESC). *Eur Heart J* 2012;**33**:2569–619. doi:10.1093/eurheartj/ehs215
- 2 O’Gara PT, Kushner FG, Ascheim DD, *et al.* 2013 ACCF/AHA Guideline for the Management of ST-Elevation Myocardial Infarction: A Report of the American College of Cardiology Foundation/American Heart Association Task Force on Practice Guidelines. *Circulation* 2013;**127**:e362–425. doi:10.1161/CIR.0b013e3182742cf6
- 3 Osterberg L, Blaschke T. Adherence to medication. *N Engl J Med* 2005;**353**:487–97. doi:10.1056/NEJMra050100
- 4 Carrillo X, Fernandez-Nofrerias E, Rodriguez-Leor O, *et al.* Early ST elevation myocardial infarction in non-capable percutaneous coronary intervention centres: *in situ* fibrinolysis vs. percutaneous coronary intervention transfer. *Eur Heart J* 2016;**37**:1034–40. doi:10.1093/eurheartj/ehv619
- 5 Regueiro A, Bosch J, Martín-Yuste V, *et al.* Cost-effectiveness of a European ST-segment elevation myocardial infarction network: results from the Catalan Codi Infart network. *BMJ Open* 2015;**5**:e009148. doi:10.1136/bmjopen-2015-009148
- 6 Swieczkowski D, Mogielnicki M, Cwalina N, *et al.* Medication adherence in patients after percutaneous coronary intervention due to acute myocardial infarction: From research to clinical implications. *Cardiol J* 2016;**23**:483–90.

- 1  
2  
3 doi:10.5603/CJ.a2016.0048  
4  
5  
6 7 Gislason GH, Rasmussen JN, Abildstrøm SZ, *et al.* Long-term compliance with  
7  
8 beta-blockers, angiotensin-converting enzyme inhibitors, and statins after acute  
9  
10 myocardial infarction. *Eur Heart J* 2006;**27**:1153–8.  
11  
12 doi:10.1093/eurheartj/ehi705  
13  
14  
15 8 Merlo J, Chaix B, Ohlsson H, *et al.* A brief conceptual tutorial of multilevel  
16  
17 analysis in social epidemiology: Using measures of clustering in multilevel  
18  
19 logistic regression to investigate contextual phenomena. *J Epidemiol Community*  
20  
21 *Health*. 2006;**60**:290–7. doi:10.1136/jech.2004.029454  
22  
23  
24  
25 9 Cabana MD, Rand CS, Powe NR, *et al.* Why don't physicians follow clinical  
26  
27 practice guidelines? A framework for improvement. *JAMA* 1999;**282**:1458–  
28  
29 65.<http://www.ncbi.nlm.nih.gov/pubmed/10535437> (accessed 28 Nov 2017).  
30  
31  
32 10 Yusuf S, Zhao F, Mehta SR, *et al.* Effects of Clopidogrel in Addition to Aspirin in  
33  
34 Patients with Acute Coronary Syndromes without ST-Segment Elevation. *N Engl J*  
35  
36 *Med* 2001;**345**:494–502. doi:10.1056/NEJMoa010746  
37  
38  
39  
40 11 Wiviott SD, Braunwald E, McCabe CH, *et al.* Prasugrel versus Clopidogrel in  
41  
42 Patients with Acute Coronary Syndromes. *N Engl J Med* 2007;**357**:2001–15.  
43  
44 doi:10.1056/NEJMoa0706482  
45  
46  
47 12 Wallentin L, Becker RC, Budaj A, *et al.* Ticagrelor versus Clopidogrel in Patients  
48  
49 with Acute Coronary Syndromes. *N Engl J Med* 2009;**361**:1045–57.  
50  
51 doi:10.1056/NEJMoa0904327  
52  
53  
54 13 Eisenstein EL, Anstrom KJ, Kong DF, *et al.* Clopidogrel Use and Long-term Clinical  
55  
56 Outcomes After Drug-Eluting Stent Implantation. *JAMA* 2007;**297**:159.  
57  
58 doi:10.1001/jama.297.2.joc60179  
59  
60



- 1  
2  
3 14 Bonaca MP, Bhatt DL, Cohen M, *et al.* Long-Term Use of Ticagrelor in Patients  
4 with Prior Myocardial Infarction. *N Engl J Med* 2015;**372**:1791–800.  
5  
6 doi:10.1056/NEJMoa1500857  
7  
8  
9  
10 15 Mauri L, Kereiakes DJ, Yeh RW, *et al.* Twelve or 30 Months of Dual Antiplatelet  
11 Therapy after Drug-Eluting Stents. *N Engl J Med* 2014;**371**:2155–66.  
12  
13 doi:10.1056/NEJMoa1409312  
14  
15  
16  
17 16 Levine GN, Bates ER, Bittl JA, *et al.* 2016 ACC/AHA Guideline Focused Update on  
18 Duration of Dual Antiplatelet Therapy in Patients With Coronary Artery Disease:  
19 A Report of the American College of Cardiology/American Heart Association  
20 Task Force on Clinical Practice Guidelines. *J Am Coll Cardiol* 2016;**68**:1082–115.  
21  
22 doi:10.1016/j.jacc.2016.03.513  
23  
24  
25  
26  
27  
28  
29  
30 17 Tinetti ME, Bogardus ST, Agostini J V. Potential Pitfalls of Disease-Specific  
31 Guidelines for Patients with Multiple Conditions. *N Engl J Med* 2004;**351**:2870–  
32  
33 4. doi:10.1056/NEJMs042458  
34  
35  
36  
37 18 Bueno H, Pocock S, Danchin N, *et al.* International patterns of dual antiplatelet  
38 therapy duration after acute coronary syndromes. *Heart* 2017;**103**:132–8.  
39  
40 doi:10.1136/heartjnl-2016-309509  
41  
42  
43  
44  
45 19 Flather MD, Babalis D, Booth J, *et al.* Cluster-randomized trial to evaluate the  
46 effects of a quality improvement program on management of non–ST-elevation  
47 acute coronary syndromes: The European Quality Improvement Programme for  
48 Acute Coronary Syndromes (EQUIP-ACS). *Am Heart J* 2011;**162**:700–707.e1.  
49  
50 doi:10.1016/j.ahj.2011.07.027  
51  
52  
53  
54  
55  
56  
57 20 Czarny MJ, Nathan AS, Yeh RW, *et al.* Adherence to Dual Antiplatelet Therapy  
58 After Coronary Stenting: A Systematic Review. *Clin Cardiol* 2014;**37**:505–13.  
59  
60

- 1  
2  
3 doi:10.1002/clc.22289  
4  
5  
6 21 Green A, Pottegård A, Broe A, *et al.* Initiation and persistence with dual  
7  
8 antiplatelet therapy after acute myocardial infarction: A Danish nationwide  
9  
10 population-based cohort study. *BMJ Open* 2016;**6**. doi:10.1136/bmjopen-2015-  
11  
12 010880  
13  
14  
15 22 Anastasius M, Lau JK, Hyun K, *et al.* The underutilisation of dual antiplatelet  
16  
17 therapy in acute coronary syndrome. *Int J Cardiol* 2017;**240**:30–6.  
18  
19 doi:10.1016/j.ijcard.2017.04.077  
20  
21  
22 23 Prami T, Khanfir H, Deleskog A, *et al.* Clinical factors associated with initiation of  
23  
24 and persistence with ADP receptor-inhibiting oral antiplatelet treatment after  
25  
26 acute coronary syndrome: a nationwide cohort study from Finland. *BMJ Open*  
27  
28 2016;**6**:e012604. doi:10.1136/bmjopen-2016-012604  
29  
30  
31  
32 24 Varenhorst C, Jensevik K, Jernberg T, *et al.* Duration of dual antiplatelet  
33  
34 treatment with clopidogrel and aspirin in patients with acute coronary  
35  
36 syndrome. *Eur Heart J* 2014;**35**:969–78. doi:10.1093/eurheartj/eh438  
37  
38  
39  
40 25 Chung S-C, Sundström J, Gale CP, *et al.* Comparison of hospital variation in acute  
41  
42 myocardial infarction care and outcome between Sweden and United Kingdom:  
43  
44 population based cohort study using nationwide clinical registries. *Br Med J*  
45  
46 2015;**351**:h3913. doi:10.1136/BMJ.H3913  
47  
48  
49  
50 26 Eisenstein EL, Wojdyla D, Anstrom KJ, *et al.* Evaluating the impact of public  
51  
52 health notification: Duke clopidogrel experience. *Circ Cardiovasc Qual Outcomes*  
53  
54 2012;**5**:767–74. doi:10.1161/CIRCOUTCOMES.111.963330  
55  
56  
57 27 Ferreira-Gonzalez I, Marsal JR, Ribera A, *et al.* Background, Incidence, and  
58  
59 Predictors of Antiplatelet Therapy Discontinuation During the First Year After  
60

1  
2  
3  
4  
5  
6  
7  
8  
9  
10  
11  
12  
13  
14  
15  
16  
17  
18  
19  
20  
21  
22  
23  
24  
25  
26  
27  
28  
29  
30  
31  
32  
33  
34  
35  
36  
37  
38  
39  
40  
41  
42  
43  
44  
45  
46  
47  
48  
49  
50  
51  
52  
53  
54  
55  
56  
57  
58  
59  
60

Drug-Eluting Stent Implantation. *Circulation* 2010;**122**:1017–25.

doi:10.1161/CIRCULATIONAHA.110.938290

For peer review only

## Figure legends

Figure 1. Patients flow

Figure 2. Persistence with DAPT from discharge to 12 months by year of the episode.

Figure 3. Temporal trend of interhospital variability in 12 months DAPT

recommendation at the PCI hospital, measured as the percentage of variance

explained by the hospital level (intraclass correlation and 95 % CI). Vertical dashed line

indicates publication of guidelines.

Table 1. Characteristics of study patients according to DAPT persistence during follow up in patients surviving for 12 months.

|                                      | No DAPT or $\leq 1$<br>month<br>(n=1692) | DAPT 2-11<br>months<br>(n=2037) | DAPT $\geq 12$<br>months<br>(n=6610) | P for trend |
|--------------------------------------|------------------------------------------|---------------------------------|--------------------------------------|-------------|
| <b>Patient Characteristics</b>       |                                          |                                 |                                      |             |
| Age, mean (SD)                       | 61.2 (13.4)                              | 61.2 (13.1)                     | 61.2 (12.4)                          | 0.693       |
| Women                                | 362 (21.4)                               | 421 (20.7)                      | 1325 (20.1)                          | 0.202       |
| Weight*(1154 missing)                | 77.5 (13.4)                              | 78.5 (14.1)                     | 78.5 (13.8)                          | 0.023       |
| <b>Cardiovascular risk factors</b>   |                                          |                                 |                                      |             |
| Current smoker                       | 814 (48.1)                               | 970 (47.6)                      | 3057 (46.3)                          | 0.077       |
| Diabetes mellitus                    | 295 (17.4)                               | 360 (17.7)                      | 1303 (19.7)                          | 0.011       |
| Hypercholesterolemia                 | 589 (34.8)                               | 713 (35)                        | 2690 (40.7)                          | <0.001      |
| Hypertension                         | 724 (42.8)                               | 912 (44.8)                      | 3158 (47.8)                          | <0.001      |
| <b>History</b>                       |                                          |                                 |                                      |             |
| Chronic Hepatic Disease              | 23 (1.4)                                 | 25 (1.2)                        | 56 (0.9)                             | 0.025       |
| Previous acute myocardial infarction | 114 (6.7)                                | 157 (7.7)                       | 576 (8.7)                            | 0.005       |

|    |                           |            |            |             |        |
|----|---------------------------|------------|------------|-------------|--------|
| 1  | Stroke or transient       |            |            |             |        |
| 2  |                           | 50 (3)     | 51 (2.5)   | 172 (2.6)   | 0.526  |
| 3  | ischemic attack           |            |            |             |        |
| 4  |                           |            |            |             |        |
| 5  |                           |            |            |             |        |
| 6  | Previous percutaneous     |            |            |             |        |
| 7  |                           | 77 (4.6)   | 120 (5.9)  | 487 (7.4)   | <0.001 |
| 8  | revascularization         |            |            |             |        |
| 9  |                           |            |            |             |        |
| 10 |                           |            |            |             |        |
| 11 | Previous surgical         |            |            |             |        |
| 12 |                           | 6 (0.4)    | 15 (0.7)   | 86 (1.3)    | <0.001 |
| 13 | revascularization         |            |            |             |        |
| 14 |                           |            |            |             |        |
| 15 |                           |            |            |             |        |
| 16 |                           |            |            |             |        |
| 17 | Chronic renal             |            |            |             |        |
| 18 |                           | 77 (4.6)   | 110 (5.4)  | 320 (4.8)   | 0.913  |
| 19 | impairment                |            |            |             |        |
| 20 |                           |            |            |             |        |
| 21 |                           |            |            |             |        |
| 22 |                           |            |            |             |        |
| 23 | Previous diagnosis of     |            |            |             |        |
| 24 |                           | 116 (6.9)  | 157 (7.7)  | 585 (8.9)   | 0.004  |
| 25 | chronic heart failure     |            |            |             |        |
| 26 |                           |            |            |             |        |
| 27 |                           |            |            |             |        |
| 28 |                           |            |            |             |        |
| 29 | Previous diagnosis of     |            |            |             |        |
| 30 |                           | 65 (3.8)   | 88 (4.3)   | 276 (4.3)   | 0.913  |
| 31 | peripheral arterial       |            |            |             |        |
| 32 | disease                   |            |            |             |        |
| 33 |                           |            |            |             |        |
| 34 |                           |            |            |             |        |
| 35 | Previous antiplatelet     |            |            |             |        |
| 36 |                           | 228 (13.5) | 303 (14.9) | 1034 (15.6) | 0.026  |
| 37 | treatment                 |            |            |             |        |
| 38 |                           |            |            |             |        |
| 39 |                           |            |            |             |        |
| 40 |                           |            |            |             |        |
| 41 |                           |            |            |             |        |
| 42 |                           |            |            |             |        |
| 43 | Two or more diseased      |            |            |             |        |
| 44 | vessels                   | 578 (34.2) | 706 (34.7) | 2742 (41.5) | <0.001 |
| 45 |                           |            |            |             |        |
| 46 |                           |            |            |             |        |
| 47 |                           |            |            |             |        |
| 48 |                           |            |            |             |        |
| 49 | <b>Vessel responsible</b> |            |            |             |        |
| 50 |                           |            |            |             |        |
| 51 |                           |            |            |             |        |
| 52 | Left anterior             |            |            |             |        |
| 53 | coronary artery           | 601 (35.5) | 737 (36.2) | 2882 (43.6) | <0.001 |
| 54 |                           |            |            |             |        |
| 55 |                           |            |            |             |        |
| 56 |                           |            |            |             |        |
| 57 |                           |            |            |             |        |
| 58 | Right coronary artery     | 710 (42)   | 889 (43.6) | 2513 (38)   | <0.001 |
| 59 |                           |            |            |             |        |
| 60 |                           |            |            |             |        |

|    |                                                            |             |             |             |        |
|----|------------------------------------------------------------|-------------|-------------|-------------|--------|
| 1  | Circumflex coronary                                        |             |             |             |        |
| 2  |                                                            | 229 (13.5)  | 281 (13.8)  | 843 (12.8)  | 0.256  |
| 3  | artery                                                     |             |             |             |        |
| 4  |                                                            |             |             |             |        |
| 5  |                                                            |             |             |             |        |
| 6  | Left main Coronary                                         |             |             |             |        |
| 7  |                                                            | 13 (0.8)    | 8 (0.4)     | 59 (0.9)    | 0.240  |
| 8  | artery                                                     |             |             |             |        |
| 9  |                                                            |             |             |             |        |
| 10 |                                                            |             |             |             |        |
| 11 |                                                            |             |             |             |        |
| 12 | <b>No. of treated vessels</b>                              |             |             |             |        |
| 13 |                                                            | 1.01 (0.2)  | 1.04 (0.2)  | 1.06 (0.3)  | <0.001 |
| 14 | <b>per patient, mean (SD)</b>                              |             |             |             |        |
| 15 |                                                            |             |             |             |        |
| 16 |                                                            |             |             |             |        |
| 17 | <b>Stent</b>                                               |             |             |             |        |
| 18 |                                                            | 1458 (86.2) | 1889 (92.7) | 6208 (93.9) | <0.001 |
| 19 |                                                            |             |             |             |        |
| 20 |                                                            |             |             |             |        |
| 21 | Bare metal                                                 | 1255 (74.2) | 1542 (75.7) | 3651 (55.2) | <0.001 |
| 22 |                                                            |             |             |             |        |
| 23 |                                                            |             |             |             |        |
| 24 | Drug-eluting                                               | 211 (12.5)  | 364 (17.9)  | 2716 (41.1) | <0.001 |
| 25 |                                                            |             |             |             |        |
| 26 |                                                            |             |             |             |        |
| 27 |                                                            |             |             |             |        |
| 28 | <b>No. of stents per</b>                                   |             |             |             |        |
| 29 |                                                            | 1.04 (0.6)  | 1.12 (0.6)  | 1.20 (0.7)  | <0.001 |
| 30 | <b>patient, mean (SD)</b>                                  |             |             |             |        |
| 31 |                                                            |             |             |             |        |
| 32 |                                                            |             |             |             |        |
| 33 |                                                            |             |             |             |        |
| 34 | <b>Admission Features</b>                                  |             |             |             |        |
| 35 |                                                            |             |             |             |        |
| 36 |                                                            |             |             |             |        |
| 37 | Admission days; mean                                       |             |             |             |        |
| 38 | (SD); (676 missing                                         | 8.2 (10.8)  | 6.9 (6)     | 6.7 (5.1)   | 0.004  |
| 39 | values)                                                    |             |             |             |        |
| 40 |                                                            |             |             |             |        |
| 41 |                                                            |             |             |             |        |
| 42 |                                                            |             |             |             |        |
| 43 |                                                            |             |             |             |        |
| 44 |                                                            |             |             |             |        |
| 45 | Discharged home from                                       |             |             |             |        |
| 46 | the PCI* hospital                                          | 1128 (66.7) | 1132 (55.6) | 3686 (55.8) | <0.001 |
| 47 |                                                            |             |             |             |        |
| 48 |                                                            |             |             |             |        |
| 49 |                                                            |             |             |             |        |
| 50 |                                                            |             |             |             |        |
| 51 | <b>DAPT† duration prescribed at PCI hospital discharge</b> |             |             |             |        |
| 52 |                                                            |             |             |             |        |
| 53 |                                                            |             |             |             |        |
| 54 | No DAPT or ≤1                                              |             |             |             |        |
| 55 | month                                                      | 561 (33.2)  | 316 (15.5)  | 298 (4.5)   | <0.001 |
| 56 |                                                            |             |             |             |        |
| 57 |                                                            |             |             |             |        |
| 58 |                                                            |             |             |             |        |
| 59 |                                                            |             |             |             |        |
| 60 |                                                            |             |             |             |        |

|   |             |            |              |             |
|---|-------------|------------|--------------|-------------|
| 1 | 2-11 months | 172 (10.2) | 215 (10.6)   | 173 (2.6)   |
| 2 |             |            |              |             |
| 3 |             |            |              |             |
| 4 | ≥ 12 months | 537 (31.7) | 995 (48.9.9) | 4740 (71.7) |
| 5 |             |            |              |             |
| 6 |             |            |              |             |
| 7 | Unspecified | 422 (24.9) | 511 (25.1)   | 1399 (21.2) |
| 8 |             |            |              |             |
| 9 |             |            |              |             |

10  
11 All numbers indicate n (column percentages) unless otherwise stated. \*PCI: percutaneous coronary  
12  
13 intervention; †DAPT: dual antiplatelet therapy  
14  
15  
16  
17  
18  
19  
20  
21  
22  
23  
24  
25  
26  
27  
28  
29  
30  
31  
32  
33  
34  
35  
36  
37  
38  
39  
40  
41  
42  
43  
44  
45  
46  
47  
48  
49  
50  
51  
52  
53  
54  
55  
56  
57  
58  
59  
60

For peer review only



Table 2. Determinants of 12 month persistence with DAPT in patients surviving for 12 months.

|                               | <b>Model 1</b>        | <b>Model 2</b>        | <b>Model 3</b>        | <b>Model 4</b>        |
|-------------------------------|-----------------------|-----------------------|-----------------------|-----------------------|
|                               | <b>N=10,412</b>       | <b>N= 10,412</b>      | <b>N=9,740</b>        | <b>N=5,947</b>        |
|                               | <b>N centers = 10</b> |
| <b>Obs per center:</b>        | <b>1041 (360-</b>     | <b>1041 (360-</b>     | <b>974, (330-</b>     | <b>595 (153-</b>      |
| <b>average (min-max)</b>      | <b>2290)</b>          | <b>2290)</b>          | <b>2136)</b>          | <b>1076)</b>          |
| Hypercholesterolemia          | 1.20 (1.10-<br>1.32)  | 1.21 (1.10-<br>1.33)  | 1.23 (1.12-<br>1.36)  | 1.15 (1.01-<br>1.31)  |
| Previous revascularization    | 1.26 (1.05-<br>1.51)  | 1.22 (1.02-<br>1.46)  | 1.25 (1.04-<br>1.52)  | 1.54 (1.19-<br>2.00)  |
| Two or more diseased vessels  | 1.21 (1.11-<br>1.33)  | 1.19 (1.08-<br>1.30)  | 1.17 (1.06-<br>1.29)  | 1.15 (1.01-<br>1.31)  |
| Left anterior coronary artery | 1.13 (1.03-<br>1.24)  | 1.12 (1.02-<br>1.23)  | 1.14 (1.04-<br>1.26)  | 1.04 (0.92-<br>1.19)  |
| Drug eluting stent            | 3.21 (2.88-<br>3.59)  | 2.17 (1.93-<br>2.43)  | 2.21 (1.96-<br>2.49)  | 2.11 (1.80-<br>2.47)  |
| Number of stents              | 1.19 (1.11-<br>1.28)  | 1.24 (1.15-<br>1.33)  | 1.26 (1.16-<br>1.36)  | 1.37 (1.24-<br>1.51)  |
| Discharged home               | 0.86 (0.77-           | 0.95 (0.87-           | 0.93 (0.85-           | N/A                   |

|                                          |                      |                      |                      |                      |
|------------------------------------------|----------------------|----------------------|----------------------|----------------------|
|                                          | 0.93)                | 1.05)                | 1.03)                |                      |
| Hospital stay (for<br>each day increase) | 0.98 (0.97-<br>0.99) | 0.98 (0.97-<br>0.99) | 0.98 (0.97-<br>0.99) | 0.98 (0.97-<br>0.98) |
| Ischaemic event in<br>follow up          | 2.15 (1.74-<br>2.66) | 2.33 (1.87-<br>2.90) | N/A                  | 3.45 (2.47-<br>4.80) |
| Hemorrhagic event in<br>follow up        | 0.42 (0.26-<br>0.67) | 0.38 (0.24-<br>0.62) | N/A                  | 0.24 (0.17-<br>0.34) |

---

**DAPT duration**
**recommended**

|                          |  |                      |                      |                       |
|--------------------------|--|----------------------|----------------------|-----------------------|
| No DAPT* or ≤ 1<br>month |  | 1 (ref.)             | 1 (ref.)             | 1 (ref.)              |
| 1-11 months              |  | 1.24 (0.97-<br>1.59) | 1.26 (0.97-<br>1.63) | 1.81 (1.32-<br>2.50)  |
| ≥12 months               |  | 6.28 (5.28-<br>7.47) | 6.54 (5.45-<br>7.84) | 8.41 (6.68-<br>10.58) |
| unspecified              |  | 3.38 (2.84-<br>4.02) | 3.54 (2.95-<br>4.24) | 4.07 (3.20-<br>5.17)  |

---

**Year**

|      |                      |                      |                      |                      |
|------|----------------------|----------------------|----------------------|----------------------|
| 2010 | 1 (ref.)             | 1 (ref.)             | 1 (ref.)             | 1 (ref.)             |
| 2011 | 0.90 (0.77-<br>1.04) | 0.80 (0.68-<br>0.94) | 0.78 (0.67-<br>0.92) | 0.89 (0.72-<br>1.10) |

|    |      |             |             |             |             |
|----|------|-------------|-------------|-------------|-------------|
| 1  | 2012 | 1.05 (0.90- | 0.88 (0.76- | 0.88 (0.75- | 0.83 (0.67- |
| 2  |      |             |             |             |             |
| 3  |      | 1.21)       | 1.03)       | 1.04)       | 1.02)       |
| 4  |      |             |             |             |             |
| 5  |      |             |             |             |             |
| 6  | 2013 | 1.03 (0.89- | 0.81 (0.69- | 0.82 (0.69- | 0.80 (0.65- |
| 7  |      |             |             |             |             |
| 8  |      | 1.20)       | 0.95)       | 0.96)       | 0.98)       |
| 9  |      |             |             |             |             |
| 10 |      |             |             |             |             |
| 11 |      |             |             |             |             |
| 12 | 2014 | 1.09 (0.94- | 0.82 (0.70- | 0.83 (0.71- | 0.72 (0.58- |
| 13 |      |             |             |             |             |
| 14 |      | 1.27)       | 0.96)       | 0.98)       | 0.90)       |
| 15 |      |             |             |             |             |
| 16 |      |             |             |             |             |
| 17 |      |             |             |             |             |
| 18 | 2015 | 1.54 (1.31- | 1.07 (0.91- | 1.11 (0.94- | 1.09 (0.87- |
| 19 |      |             |             |             |             |
| 20 |      | 1.80)       | 1.26)       | 1.32)       | 1.36)       |
| 21 |      |             |             |             |             |
| 22 |      |             |             |             |             |

---

All numbers indicate ORs and Confidence Intervals unless otherwise stated. \*DAPT: dual antiplatelet therapy; Model 1: Without DAPT duration recommendation; Model 2: Final model; Model 3: Excluding patients with vascular events during follow up; Model 4: Excluding patients derived to another hospital

Table 3. Characteristics of study patients according to DAPT duration recommended at the PCI hospital discharge.

|                                        | No<br>DAPT*<br>or ≤1<br>month<br>(n=1212) | DAPT 2-<br>11<br>months<br>(n=581) | DAPT<br>≥12<br>months<br>(n=6486) | Unspecified<br>(n=2432) | P for trend<br>(excluding<br>unspecified) |
|----------------------------------------|-------------------------------------------|------------------------------------|-----------------------------------|-------------------------|-------------------------------------------|
| <b>Patient<br/>Characteristics</b>     |                                           |                                    |                                   |                         |                                           |
| Age, mean (SD)                         | 62 (13.2)                                 | 61.2<br>(13.6)                     | 61.3<br>(12.6)                    | 61.6 (13.1)             | 0.221                                     |
| Women                                  | 224<br>(18.5)                             | 117<br>(20.1)                      | 1333<br>(20.6)                    | 539 (21.8)              | 0.107                                     |
| Weight (1174<br>missing)               | 77.6<br>(13.7)                            | 78.4<br>(13.8)                     | 78.3<br>(13.6)                    | 78.1 (14.4)             | 0.193                                     |
| <b>Cardiovascular risk<br/>factors</b> |                                           |                                    |                                   |                         |                                           |
| Current smoker                         | 601<br>(49.6)                             | 303<br>(52.2)                      | 2937<br>(45.3)                    | 1142 (47)               | 0.001                                     |
| Diabetes mellitus                      | 243<br>(20.1)                             | 93 (16)                            | 1234<br>(19)                      | 483 (19.9)              | 0.723                                     |

|    |                      |          |        |        |             |       |
|----|----------------------|----------|--------|--------|-------------|-------|
| 1  |                      | 467      | 171    | 2589   |             |       |
| 2  | Hypercholesterolemia |          |        |        | 912 (37.5)  | 0.039 |
| 3  |                      | (38.5)   | (29.4) | (39.9) |             |       |
| 4  |                      |          |        |        |             |       |
| 5  |                      |          |        |        |             |       |
| 6  |                      |          | 259    | 3075   |             |       |
| 7  | Hypertension         | 569 (47) |        |        | 1107 (45.5) | 0.550 |
| 8  |                      |          | (44.6) | (47.4) |             |       |
| 9  |                      |          |        |        |             |       |
| 10 |                      |          |        |        |             |       |
| 11 |                      |          |        |        |             |       |

---

## History

---

|    |                       |          |          |           |            |       |
|----|-----------------------|----------|----------|-----------|------------|-------|
| 15 | Chronic Hepatic       |          |          |           |            |       |
| 16 | Disease               | 22 (1.8) | 7 (1.2)  | 61 (0.9)  | 22 (0.9)   | 0.007 |
| 17 |                       |          |          |           |            |       |
| 18 | Previous acute        |          |          |           |            |       |
| 19 | myocardial infarction | 82 (6.8) | 35 (6)   | 559 (8.6) | 227 (9.3)  | 0.010 |
| 20 |                       |          |          |           |            |       |
| 21 | Stroke or transient   |          |          |           |            |       |
| 22 | ischemic attack       | 44 (3.6) | 18 (3.1) | 166 (2.6) | 65 (2.7)   | 0.031 |
| 23 |                       |          |          |           |            |       |
| 24 | Previous              |          |          |           |            |       |
| 25 | percutaneous          | 59 (4.9) | 28 (4.8) | 455 (7)   | 182 (7.5)  | 0.002 |
| 26 | revascularization     |          |          |           |            |       |
| 27 |                       |          |          |           |            |       |
| 28 | Previous surgical     |          |          |           |            |       |
| 29 | revascularization     | 6 (0.5)  | 3 (0.5)  | 78 (1.2)  | 25 (1)     | 0.014 |
| 30 |                       |          |          |           |            |       |
| 31 | Chronic renal         |          |          |           |            |       |
| 32 | impairment            | 64 (5.3) | 28 (4.8) | 329 (5.1) | 145 (6)    | 0.825 |
| 33 |                       |          |          |           |            |       |
| 34 | Previous diagnosis of |          |          |           |            |       |
| 35 | chronic heart failure | 98 (8.1) | 36 (6.2) | 539 (8.3) | 249 (10.2) | 0.495 |
| 36 |                       |          |          |           |            |       |
| 37 |                       |          |          |           |            |       |
| 38 |                       |          |          |           |            |       |
| 39 |                       |          |          |           |            |       |
| 40 |                       |          |          |           |            |       |
| 41 |                       |          |          |           |            |       |
| 42 |                       |          |          |           |            |       |
| 43 |                       |          |          |           |            |       |
| 44 |                       |          |          |           |            |       |
| 45 |                       |          |          |           |            |       |
| 46 |                       |          |          |           |            |       |
| 47 |                       |          |          |           |            |       |
| 48 |                       |          |          |           |            |       |
| 49 |                       |          |          |           |            |       |
| 50 |                       |          |          |           |            |       |
| 51 |                       |          |          |           |            |       |
| 52 |                       |          |          |           |            |       |
| 53 |                       |          |          |           |            |       |
| 54 |                       |          |          |           |            |       |
| 55 |                       |          |          |           |            |       |
| 56 |                       |          |          |           |            |       |
| 57 |                       |          |          |           |            |       |
| 58 |                       |          |          |           |            |       |
| 59 |                       |          |          |           |            |       |
| 60 |                       |          |          |           |            |       |

|    |                           |          |          |           |             |        |
|----|---------------------------|----------|----------|-----------|-------------|--------|
| 1  | Previous diagnosis of     |          |          |           |             |        |
| 2  |                           |          |          |           |             |        |
| 3  | peripheral arterial       | 58 (4.8) | 28 (4.8) | 230 (3.6) | 132 (5.4)   | 0.020  |
| 4  |                           |          |          |           |             |        |
| 5  | disease                   |          |          |           |             |        |
| 6  |                           |          |          |           |             |        |
| 7  |                           |          |          |           |             |        |
| 8  |                           |          |          |           |             |        |
| 9  | Previous Antiplatelet     | 189      | 88       | 965       |             |        |
| 10 |                           |          |          |           | 411 (16.9)  | 0.518  |
| 11 | treatment                 | (15.6)   | (15.2)   | (14.9)    |             |        |
| 12 |                           |          |          |           |             |        |
| 13 |                           |          |          |           |             |        |
| 14 |                           |          |          |           |             |        |
| 15 | Two or more               | 457      | 187      | 2618      |             |        |
| 16 |                           |          |          |           | 949 (39)    | 0.010  |
| 17 | diseased vessels          | (37.7)   | (32.2)   | (40.4)    |             |        |
| 18 |                           |          |          |           |             |        |
| 19 |                           |          |          |           |             |        |
| 20 | <b>Vessel responsible</b> |          |          |           |             |        |
| 21 |                           |          |          |           |             |        |
| 22 |                           |          |          |           |             |        |
| 23 | Left anterior             | 378      | 234      | 2800      |             |        |
| 24 |                           |          |          |           | 973 (40)    | <0.001 |
| 25 | coronary artery           | (31.2)   | (40.3)   | (43.2)    |             |        |
| 26 |                           |          |          |           |             |        |
| 27 |                           |          |          |           |             |        |
| 28 |                           |          |          |           |             |        |
| 29 | Right coronary            | 592      | 235      | 2475      |             |        |
| 30 |                           |          |          |           | 944 (38.8)  | <0.001 |
| 31 | artery                    | (48.8)   | (40.5)   | (38.1)    |             |        |
| 32 |                           |          |          |           |             |        |
| 33 |                           |          |          |           |             |        |
| 34 |                           |          |          |           |             |        |
| 35 | Circumflex coronary       |          | 71       | 869       |             |        |
| 36 |                           | 182 (15) | (12.2)   | (13.4)    | 279 (11.5)  | 0.218  |
| 37 | artery                    |          |          |           |             |        |
| 38 |                           |          |          |           |             |        |
| 39 |                           |          |          |           |             |        |
| 40 |                           |          |          |           |             |        |
| 41 | Left main Coronary        |          |          |           |             |        |
| 42 |                           | 3 (0.3)  | 0        | 65 (1)    | 19 (0.8)    | 0.002  |
| 43 | artery                    |          |          |           |             |        |
| 44 |                           |          |          |           |             |        |
| 45 |                           |          |          |           |             |        |
| 46 |                           |          |          |           |             |        |
| 47 | No. of treated vessels    |          |          |           |             |        |
| 48 |                           | 1.02     | 1.05     | 1.05      |             |        |
| 49 | per patient, mean         |          |          |           | 1.05 (0.3)  | <0.001 |
| 50 |                           | (0.1)    | (0.2)    | (0.3)     |             |        |
| 51 | (SD)                      |          |          |           |             |        |
| 52 |                           |          |          |           |             |        |
| 53 |                           |          |          |           |             |        |
| 54 |                           |          |          |           |             |        |
| 55 |                           | 1171     | 561      | 6057      |             |        |
| 56 | <b>Stent</b>              |          |          |           | 2094 (86.1) | <0.001 |
| 57 |                           | (96.6)   | (96.6)   | (93.4)    |             |        |
| 58 |                           |          |          |           |             |        |
| 59 |                           |          |          |           |             |        |
| 60 |                           |          |          |           |             |        |

|    |                           |         |        |           |            |        |  |
|----|---------------------------|---------|--------|-----------|------------|--------|--|
| 1  |                           | 1154    | 536    | 3437      | 1571       |        |  |
| 2  | Bare metal                |         |        |           |            | <0.001 |  |
| 3  |                           | (95.2)  | (92.3) | (53)      | (64.6)     |        |  |
| 4  |                           |         |        |           |            |        |  |
| 5  |                           |         |        |           |            |        |  |
| 6  |                           | 17      | 26     | 2756      |            |        |  |
| 7  | Drug-eluting              |         |        |           | 578 (23.8) | <0.001 |  |
| 8  |                           | (1.4)   | (4.5)  | (42.5)    |            |        |  |
| 9  |                           |         |        |           |            |        |  |
| 10 |                           |         |        |           |            |        |  |
| 11 |                           |         |        |           |            |        |  |
| 12 | <b>No. of stents per</b>  | 1.15    | 1.22   | 1.19      |            |        |  |
| 13 |                           |         |        |           |            |        |  |
| 14 | <b>patient, mean (SD)</b> | (0.5)   | (0.6)  | (0.7)     | 1.08 (0.7) | 0.665  |  |
| 15 |                           |         |        |           |            |        |  |
| 16 |                           |         |        |           |            |        |  |
| 17 |                           |         |        |           |            |        |  |
| 18 | <b>Admission Features</b> |         |        |           |            |        |  |
| 19 |                           |         |        |           |            |        |  |
| 20 |                           |         |        |           |            |        |  |
| 21 | Admission days;           |         |        |           |            |        |  |
| 22 |                           |         | 6.6    |           |            |        |  |
| 23 | mean (SD); (662           | 7 (4.7) | (5.8)  | 6.8 (5.8) | 8.5 (11.2) | <0.001 |  |
| 24 | missing values)           |         |        |           |            |        |  |
| 25 |                           |         |        |           |            |        |  |
| 26 |                           |         |        |           |            |        |  |
| 27 |                           |         |        |           |            |        |  |
| 28 |                           |         |        |           |            |        |  |
| 29 | Discharged home           |         |        |           |            |        |  |
| 30 |                           | 904     | 438    | 3720      |            |        |  |
| 31 | from the PCI              |         |        |           | 1095 (45)  | <0.001 |  |
| 32 |                           | (74.6)  | (75.4) | (57.4)    |            |        |  |
| 33 | hospital                  |         |        |           |            |        |  |
| 34 |                           |         |        |           |            |        |  |
| 35 |                           |         |        |           |            |        |  |
| 36 |                           |         |        |           |            |        |  |
| 37 |                           |         |        |           |            |        |  |

\*DAPT: dual antiplatelet therapy

Table 4. Determinants of 12-month prescription and interhospital variability measures.

|                                               | Determinants of<br>12- month<br>recommendation<br>of DAPT* | Determinants of<br>12- month<br>recommendation<br>of DAPT<br>excluding<br>patients derived<br>to another<br>hospital |
|-----------------------------------------------|------------------------------------------------------------|----------------------------------------------------------------------------------------------------------------------|
|                                               | N=8279                                                     | N=5062                                                                                                               |
|                                               | N centers = 10                                             | N centers = 10                                                                                                       |
| <b>Obs per center: average (min-<br/>max)</b> | <b>828 (240-1750)</b>                                      | <b>506 (122-986)</b>                                                                                                 |
| Previous heart failure                        | 0.81 (0.59-1.11)                                           | 0.88 (0.57-1.37)                                                                                                     |
| Drug eluting stent                            | 28.75 (12.44-<br>66.43)                                    | 36.52 (14.08-<br>94.76)                                                                                              |
| Two or more treated vessels                   | 1.50 (0.95-2.35)                                           | 2.00 (1.10-3.64)                                                                                                     |
| Discharged home                               | 0.40 (0.34-0.48)                                           | N/A                                                                                                                  |
| <b>Year</b>                                   |                                                            |                                                                                                                      |
| 2010                                          | 1 (ref.)                                                   | 1 (ref.)                                                                                                             |



|    |      |                   |                   |
|----|------|-------------------|-------------------|
| 1  | 2011 | 2.60 (1.07-6.31)  | 2.40 (0.81-7.09)  |
| 2  |      |                   |                   |
| 3  |      |                   |                   |
| 4  | 2012 | 4.35 (1.77-10.65) | 4.75 (1.57-14.43) |
| 5  |      |                   |                   |
| 6  |      |                   |                   |
| 7  | 2013 | 9.88 (3.95-24.73) | 9.28 (2.93-29.36) |
| 8  |      |                   |                   |
| 9  |      |                   |                   |
| 10 | 2014 | 11.00 (4.31-      | 12.67 (3.86-      |
| 11 |      |                   |                   |
| 12 |      | 28.08)            | 41.62)            |
| 13 |      |                   |                   |
| 14 |      |                   |                   |
| 15 |      |                   |                   |
| 16 | 2015 | 14.23 (5.70-      | 29.40 (8.96-      |
| 17 |      |                   |                   |
| 18 |      |                   |                   |
| 19 |      | 35.65)            | 96.45)            |
| 20 |      |                   |                   |
| 21 |      |                   |                   |

---

**Random effects**


---

|    |                                 |                   |                   |
|----|---------------------------------|-------------------|-------------------|
| 25 | Random intercept                | 4.46 (1.71-11.60) | 6.05 (2.36-15.52) |
| 26 |                                 |                   |                   |
| 27 |                                 |                   |                   |
| 28 | Random slope (drug eluting      | 1.10 (0.32-3.84)  | 1.00 (0.25-4.05)  |
| 29 | stent)                          |                   |                   |
| 30 |                                 |                   |                   |
| 31 |                                 |                   |                   |
| 32 |                                 |                   |                   |
| 33 |                                 |                   |                   |
| 34 | Random slope (year)             | 0.69 (0.39-1.24)  | 0.99 (0.53-1.87)  |
| 35 |                                 |                   |                   |
| 36 |                                 |                   |                   |
| 37 |                                 |                   |                   |
| 38 | Intraclass correlation (95% CI) | 57.5 (34.2-77.9)  | 64.8 (41.7-82.5)  |
| 39 |                                 |                   |                   |
| 40 |                                 |                   |                   |
| 41 | Median OR (95% CrI†)            | 7.49 (1.21-348)   | 10.44 (1.12-2428) |
| 42 |                                 |                   |                   |
| 43 |                                 |                   |                   |

---

All numbers indicate ORs and Confidence Intervals unless otherwise stated

\*DAPT: dual antiplatelet therapy; †CrI: credibility interval

44  
45  
46  
47  
48  
49  
50  
51  
52  
53  
54  
55  
56  
57  
58  
59  
60

Figure 1

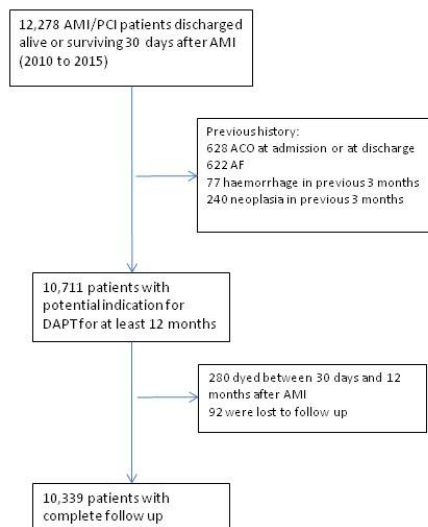

Figure 1

254x190mm (96 x 96 DPI)

1  
2  
3  
4  
5  
6  
7  
8  
9  
10  
11  
12  
13  
14  
15  
16  
17  
18  
19  
20  
21  
22  
23  
24  
25  
26  
27  
28  
29  
30  
31  
32  
33  
34  
35  
36  
37  
38  
39  
40  
41  
42  
43  
44  
45  
46  
47  
48  
49  
50  
51  
52  
53  
54  
55  
56  
57  
58  
59  
60

Figure 2

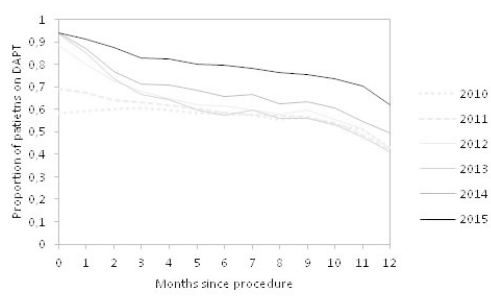

| Patients alive | 0    | 1    | 2    | 3    | 4    | 5    | 6    | 7    | 8    | 9    | 10   | 11   | 12   |
|----------------|------|------|------|------|------|------|------|------|------|------|------|------|------|
| 2010           | 1151 | 1140 | 1144 | 1141 | 1139 | 1130 | 1137 | 1135 | 1133 | 1132 | 1131 | 1131 | 1130 |
| 2011           | 1499 | 1497 | 1495 | 1494 | 1492 | 1489 | 1484 | 1480 | 1472 | 1460 | 1466 | 1463 | 1450 |
| 2012           | 1702 | 1690 | 1695 | 1693 | 1690 | 1689 | 1686 | 1685 | 1685 | 1680 | 1679 | 1679 | 1670 |
| 2013           | 1750 | 1741 | 1734 | 1731 | 1720 | 1724 | 1717 | 1713 | 1712 | 1711 | 1700 | 1704 | 1700 |
| 2014           | 1773 | 1765 | 1760 | 1757 | 1755 | 1753 | 1749 | 1745 | 1740 | 1737 | 1735 | 1729 | 1726 |
| 2015           | 1704 | 1779 | 1771 | 1766 | 1759 | 1754 | 1752 | 1750 | 1745 | 1742 | 1741 | 1741 | 1737 |

Figure 2

254x190mm (96 x 96 DPI)

Figure 4

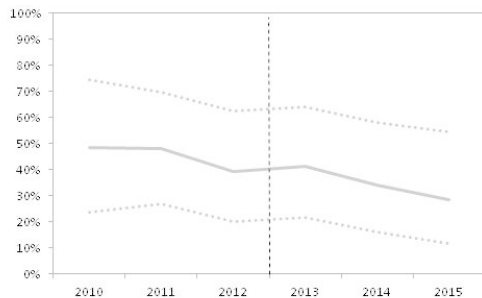

Figure 3

254x190mm (96 x 96 DPI)

## Supplemental methods

### Data validation processes in the AMI Code registry

1. Automatic data validation processes to identify and feed-back missing data and incongruities.

2. Periodic data validation process every 3-6 months:

Since year 2011 this process was automated. The system automatically detects missing information in key variables and the identification of AMI codes that were activated by the emergency services (before admission) and were not included in the registry. Feed back for data validation is sent every 3-6 months for amendment or justification to the person responsible for data entry at each AMI Code Hospital.

Since year 2015 the automated process can be managed directly at any time by the person responsible for data entry in each hospital.

3. Specific studies:

In 2012 data were evaluated for **exhaustiveness**: all AMI cases consecutively admitted in 43 hospitals in Catalonia (10 AMI Code hospitals and 32 no AMI Code hospitals) during a 3 months period were registered and compared with the episodes registered in the AMI Code registry.

Between 88-92% of STEACS episodes were included in the AMI Code registry.

In 2013 concordance of the information between the AMI Code registry and the information from clinical records was assessed. 330 cases were analyzed and concordance was good for all key variables and there were no differences between hospitals.

1 **Supplemental tables**

2  
3  
4 Table 1S. ICD9 codes used for the identification of conditions and diseases present at index admission and for the  
5  
6 identification of events during follow up.  
7  
8

9

| Disease or condition                  | ICD9 diagnostic or procedure code                                                                                                                                                                                                                     |
|---------------------------------------|-------------------------------------------------------------------------------------------------------------------------------------------------------------------------------------------------------------------------------------------------------|
| Heart failure                         | 428.0, 428.1, 428.22, 428.23, 428.3, 428.32, 428.33, 428.41, 428.43                                                                                                                                                                                   |
| Renal disease                         | 585*                                                                                                                                                                                                                                                  |
| Neoplasia                             | 140-239                                                                                                                                                                                                                                               |
| Anemia                                | 280-285                                                                                                                                                                                                                                               |
| Chronic obstructive pulmonary disease | 491-492, 494*, 496*                                                                                                                                                                                                                                   |
| Peripheral arterial disease           | 440.2, 440.3, 440.4                                                                                                                                                                                                                                   |
| Atrial fibrillation                   | 427.3*                                                                                                                                                                                                                                                |
| <b>Events during follow up</b>        |                                                                                                                                                                                                                                                       |
| Acute myocardial infarction           | 410*, except: 410.*2                                                                                                                                                                                                                                  |
| Ischemic stroke                       | 433*, 434*, except: 433.*0, 434.*0                                                                                                                                                                                                                    |
| Haemorrhagic stroke                   | 430*, 431*, 432*                                                                                                                                                                                                                                      |
| Intraocular bleeding                  | 362.81, 363.6, 363.61, 363.62, 376.32, 377.42, 379.23                                                                                                                                                                                                 |
| Digestive bleeding                    | 530.21, 530.7, 530.82, 531.0, 531.2, 531.4, 531.6, 532.0, 532.2, 532.4, 532.6, 533.0, 533.2, 533.4, 534.4, 534.6, 535.01, 535.11, 535.21, 535.31, 535.41, 535.51, 535.61, 535.71, 537.83, 562.02, 562.03, 562.12, 562.13, 569.3, 569.85, 578.1, 578.9 |
| Other bleeding                        | 246.3, 459.0, 602.1, 784.8, 596.7, 599.7, 852*, 997.02, 998.1,                                                                                                                                                                                        |
| Endoscopic treatment                  | 444.3, 454.2, 454.3                                                                                                                                                                                                                                   |
| Transfusion                           | 990.4                                                                                                                                                                                                                                                 |

10  
11  
12  
13  
14  
15  
16  
17  
18  
19  
20  
21  
22  
23  
24  
25  
26  
27  
28  
29  
30  
31  
32  
33  
34  
35  
36  
37  
38  
39  
40  
41  
42  
43  
44  
45  
46  
47  
48  
49  
50  
51  
52  
53  
54  
55  
56  
57  
58  
59  
60

Table 2S. ATC codes used for the identification of drug treatment

| <b>Drug treatment</b> | <b>ATC code</b>           |
|-----------------------|---------------------------|
| ASA                   | B01AC06, N02BA01, B01AC30 |
| Ticlopidine           | B01AC05                   |
| Clopidogrel           | B01AC04                   |
| Prasugrel             | B01AC22                   |
| Ticagrelor            | B01AC24                   |
| Dabigatran etexilate  | B01AE07                   |
| Rivaroxaban           | B01AF01                   |
| Apixaban              | B01AF02                   |
| Beta-blocker          | C07                       |
| ACE inhibitor         | C09                       |
| Statins               | C10AA                     |

Supplemental figure. DAPT duration recommended in each hospital by year of episode

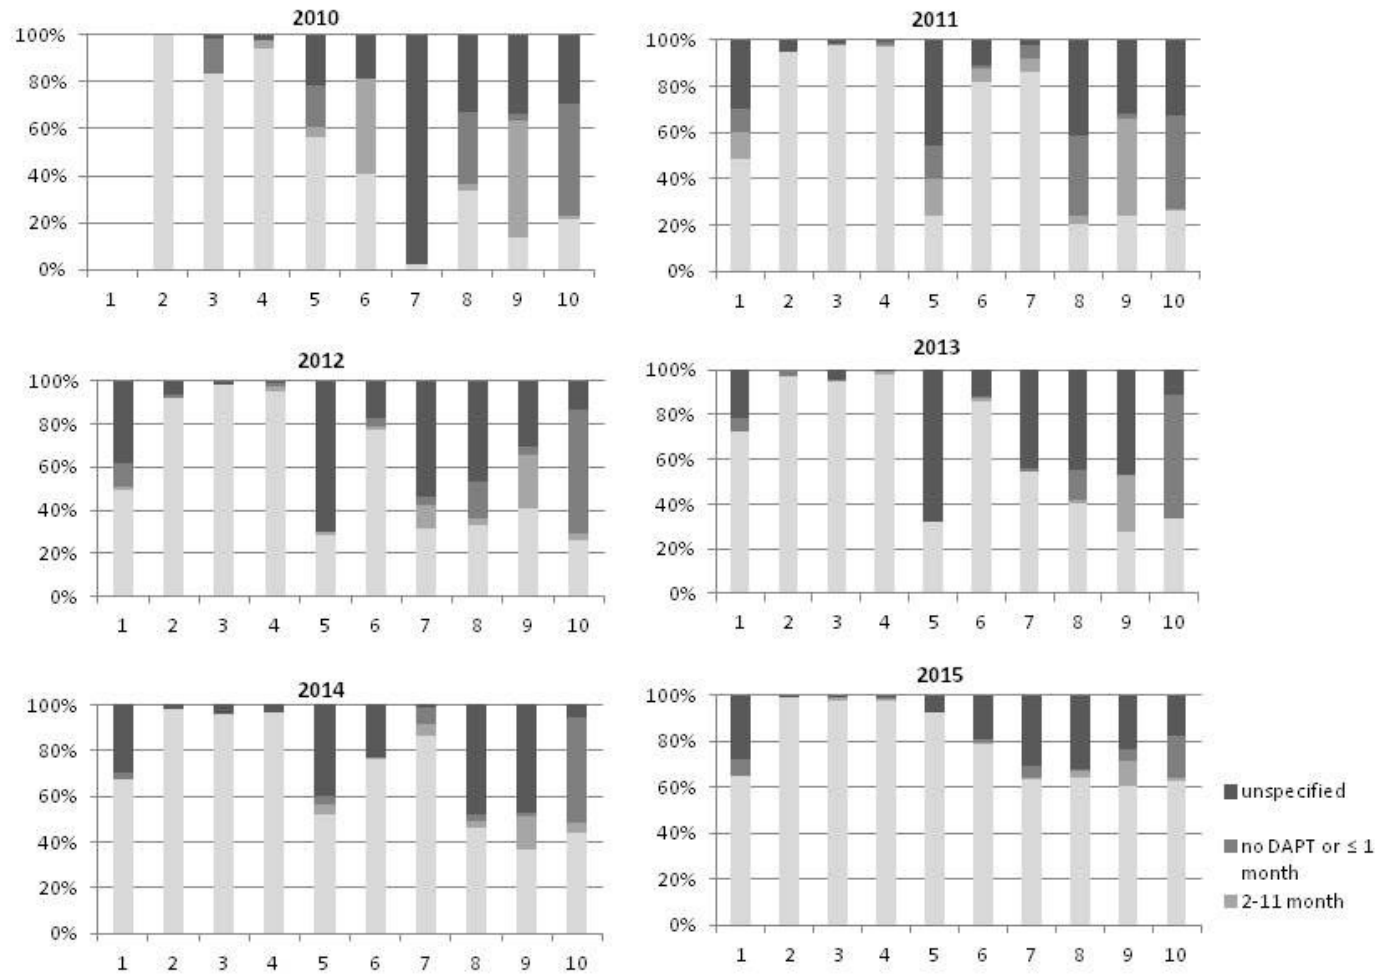



STROBE Statement—Checklist of items that should be included in reports of *cohort studies*

|                              | Item No | Recommendation                                                                                                                                                                                                                                                                                                         | Page num                                                            |
|------------------------------|---------|------------------------------------------------------------------------------------------------------------------------------------------------------------------------------------------------------------------------------------------------------------------------------------------------------------------------|---------------------------------------------------------------------|
| <b>Title and abstract</b>    | 1       | (a) Indicate the study's design with a commonly used term in the title or the abstract                                                                                                                                                                                                                                 | Title and abstract page 3 (Design subheading)                       |
|                              |         | (b) Provide in the abstract an informative and balanced summary of what was done and what was found                                                                                                                                                                                                                    | Page 3. Abstract                                                    |
| <b>Introduction</b>          |         |                                                                                                                                                                                                                                                                                                                        |                                                                     |
| Background/rationale         | 2       | Explain the scientific background and rationale for the investigation being reported                                                                                                                                                                                                                                   | Page 6                                                              |
| Objectives                   | 3       | State specific objectives, including any prespecified hypotheses                                                                                                                                                                                                                                                       | Page 6 (last paragraph)                                             |
| <b>Methods</b>               |         |                                                                                                                                                                                                                                                                                                                        |                                                                     |
| Study design                 | 4       | Present key elements of study design early in the paper                                                                                                                                                                                                                                                                | Pages 8-9                                                           |
| Setting                      | 5       | Describe the setting, locations, and relevant dates, including periods of recruitment, exposure, follow-up, and data collection                                                                                                                                                                                        | Pages 8-9                                                           |
| Participants                 | 6       | (a) Give the eligibility criteria, and the sources and methods of selection of participants. Describe methods of follow-up<br>(b) For matched studies, give matching criteria and number of exposed and unexposed                                                                                                      | Pages 8-9                                                           |
| Variables                    | 7       | Clearly define all outcomes, exposures, predictors, potential confounders, and effect modifiers. Give diagnostic criteria, if applicable                                                                                                                                                                               | Pages 8-9                                                           |
| Data sources/<br>measurement | 8*      | For each variable of interest, give sources of data and details of methods of assessment (measurement). Describe comparability of assessment methods if there is more than one group                                                                                                                                   | Pages 8-9                                                           |
| Bias                         | 9       | Describe any efforts to address potential sources of bias                                                                                                                                                                                                                                                              | Page 11 (sensitivity analyses)                                      |
| Study size                   | 10      | Explain how the study size was arrived at                                                                                                                                                                                                                                                                              | Page 9 (study population)                                           |
| Quantitative variables       | 11      | Explain how quantitative variables were handled in the analyses. If applicable, describe which groupings were chosen and why                                                                                                                                                                                           | Page 9-11                                                           |
| Statistical methods          | 12      | (a) Describe all statistical methods, including those used to control for confounding<br>(b) Describe any methods used to examine subgroups and interactions<br>(c) Explain how missing data were addressed<br>(d) If applicable, explain how loss to follow-up was addressed<br>(e) Describe any sensitivity analyses | Pages 10-11<br>Pages 10-11<br>Pages 10-11<br>Pages 10-11<br>Page 11 |
| <b>Results</b>               |         |                                                                                                                                                                                                                                                                                                                        |                                                                     |
| Participants                 | 13*     | (a) Report numbers of individuals at each stage of study—eg numbers potentially eligible, examined for eligibility, confirmed eligible, included in the study, completing follow-                                                                                                                                      | Page 12                                                             |

|                          |     |                                                                                                                                                                                                              |                |
|--------------------------|-----|--------------------------------------------------------------------------------------------------------------------------------------------------------------------------------------------------------------|----------------|
|                          |     | up, and analysed                                                                                                                                                                                             |                |
|                          |     | (b) Give reasons for non-participation at each stage                                                                                                                                                         | Page 12        |
|                          |     | (c) Consider use of a flow diagram                                                                                                                                                                           | Fig 1          |
| Descriptive data         | 14* | (a) Give characteristics of study participants (eg demographic, clinical, social) and information on exposures and potential confounders                                                                     | Tables 1, 3    |
|                          |     | (b) Indicate number of participants with missing data for each variable of interest                                                                                                                          | Tables 1, 3    |
|                          |     | (c) Summarise follow-up time (eg, average and total amount)                                                                                                                                                  | Page 9         |
| Outcome data             | 15* | Report numbers of outcome events or summary measures over time                                                                                                                                               | Fig 2          |
| Main results             | 16  | (a) Give unadjusted estimates and, if applicable, confounder-adjusted estimates and their precision (eg, 95% confidence interval). Make clear which confounders were adjusted for and why they were included | Tables 2, 4    |
|                          |     | (b) Report category boundaries when continuous variables were categorized                                                                                                                                    | Tables 2, 4    |
|                          |     | (c) If relevant, consider translating estimates of relative risk into absolute risk for a meaningful time period                                                                                             |                |
| Other analyses           | 17  | Report other analyses done—eg analyses of subgroups and interactions, and sensitivity analyses                                                                                                               | Tables 2, 4    |
| <b>Discussion</b>        |     |                                                                                                                                                                                                              |                |
| Key results              | 18  | Summarise key results with reference to study objectives                                                                                                                                                     | Page 14        |
| Limitations              | 19  | Discuss limitations of the study, taking into account sources of potential bias or imprecision. Discuss both direction and magnitude of any potential bias                                                   | Pages 5 and 17 |
| Interpretation           | 20  | Give a cautious overall interpretation of results considering objectives, limitations, multiplicity of analyses, results from similar studies, and other relevant evidence                                   | Pages 14-18    |
| Generalisability         | 21  | Discuss the generalisability (external validity) of the study results                                                                                                                                        | Pages 14-18    |
| <b>Other information</b> |     |                                                                                                                                                                                                              |                |
| Funding                  | 22  | Give the source of funding and the role of the funders for the present study and, if applicable, for the original study on which the present article is based                                                | Page 5         |

\*Give information separately for exposed and unexposed groups.

**Note:** An Explanation and Elaboration article discusses each checklist item and gives methodological background and published examples of transparent reporting. The STROBE checklist is best used in conjunction with this article (freely available on the Web sites of PLoS Medicine at <http://www.plosmedicine.org/>, Annals of Internal Medicine at <http://www.annals.org/>, and Epidemiology at <http://www.epidem.com/>). Information on the STROBE Initiative is available at <http://www.strobe-statement.org>.

# BMJ Open

## Persistence with dual antiplatelet therapy after percutaneous coronary intervention for ST-Segment-Elevation Acute Coronary Syndrome. A population-based cohort study in Catalonia (Spain)

|                                 |                                                                                                                                                                                                                                                                                                                                                                                                                                                                                                                                                                                                                                                                                                                                                                                                                                                                                                                                                                                                                                                                                                                                                                                                                                                                                                                                                                                                                                                                                                                                    |
|---------------------------------|------------------------------------------------------------------------------------------------------------------------------------------------------------------------------------------------------------------------------------------------------------------------------------------------------------------------------------------------------------------------------------------------------------------------------------------------------------------------------------------------------------------------------------------------------------------------------------------------------------------------------------------------------------------------------------------------------------------------------------------------------------------------------------------------------------------------------------------------------------------------------------------------------------------------------------------------------------------------------------------------------------------------------------------------------------------------------------------------------------------------------------------------------------------------------------------------------------------------------------------------------------------------------------------------------------------------------------------------------------------------------------------------------------------------------------------------------------------------------------------------------------------------------------|
| Journal:                        | <i>BMJ Open</i>                                                                                                                                                                                                                                                                                                                                                                                                                                                                                                                                                                                                                                                                                                                                                                                                                                                                                                                                                                                                                                                                                                                                                                                                                                                                                                                                                                                                                                                                                                                    |
| Manuscript ID                   | bmjopen-2018-028114.R1                                                                                                                                                                                                                                                                                                                                                                                                                                                                                                                                                                                                                                                                                                                                                                                                                                                                                                                                                                                                                                                                                                                                                                                                                                                                                                                                                                                                                                                                                                             |
| Article Type:                   | Research                                                                                                                                                                                                                                                                                                                                                                                                                                                                                                                                                                                                                                                                                                                                                                                                                                                                                                                                                                                                                                                                                                                                                                                                                                                                                                                                                                                                                                                                                                                           |
| Date Submitted by the Author:   | 28-Mar-2019                                                                                                                                                                                                                                                                                                                                                                                                                                                                                                                                                                                                                                                                                                                                                                                                                                                                                                                                                                                                                                                                                                                                                                                                                                                                                                                                                                                                                                                                                                                        |
| Complete List of Authors:       | Ribera, Aida; University Hospital Vall d'Hebron, Cardiology<br>Ferreira-Gonzalez, Ignacio; University Hospital Vall d'Hebron, Cardiology<br>Marsal, Josep Ramon; University Hospital Vall d'Hebron, Cardiology<br>Oristrell, Gerard; University Hospital Vall d'Hebron, Cardiology<br>Faixedas, Maria Teresa; Servei Català de la Salut, Catalonia, Spain<br>Rosas, Alba; 4. Departament de Salut, Generalitat de Catalunya<br>Tizón-Marcos, Helena; 5. Cardiology Department, Hospital del Mar, and<br>Heart Diseases Biomedical Research Group and IMIM (Hospital del Mar<br>Medical Research Institute), and Faculty of Medicine, Universitat<br>Autonoma de Barcelona<br>Rojas, Sergio; 6. Cardiology Department, Hospital Universitari de<br>Tarragona Joan XXIII, IISPV, and Universidad Rovira Virgili<br>Labata, Carlos; Cardiology Department, Hospital German Tries i Pujol<br>Cardenas, Merida; Cardiology Department, Hospital Josep Trueta<br>Homs, Silvia; Cardiology Department, Hospital Mútua de Terrassa<br>Tomas-Querol, Carlos; Cardiology Department, Hospital Arnau de<br>Villanova<br>Garcia-Picart, Joan; 11. Cardiology Department, Hospital de la Santa<br>Creu i Sant Pau<br>Gomez-Hospital, Joan; Cardiology Department, Hospital de Bellvitge<br>Pijoan, Jose; BioCruces Health Research Institute<br>Masotti, Monica; Cardiology Department, Hospital Clínic<br>Mauri, Josepa; Departament de Salut, Generalitat de Catalunya<br>Garcia Dorado, David; University Hospital Vall d'Hebron, Cardiology |
| <b>Primary Subject Heading</b>: | Cardiovascular medicine                                                                                                                                                                                                                                                                                                                                                                                                                                                                                                                                                                                                                                                                                                                                                                                                                                                                                                                                                                                                                                                                                                                                                                                                                                                                                                                                                                                                                                                                                                            |
| Secondary Subject Heading:      | Health services research                                                                                                                                                                                                                                                                                                                                                                                                                                                                                                                                                                                                                                                                                                                                                                                                                                                                                                                                                                                                                                                                                                                                                                                                                                                                                                                                                                                                                                                                                                           |
| Keywords:                       | dual antiplatelet therapy, ST-elevation myocardial infarction, persistence with treatment, percutaneous coronary intervention                                                                                                                                                                                                                                                                                                                                                                                                                                                                                                                                                                                                                                                                                                                                                                                                                                                                                                                                                                                                                                                                                                                                                                                                                                                                                                                                                                                                      |
|                                 |                                                                                                                                                                                                                                                                                                                                                                                                                                                                                                                                                                                                                                                                                                                                                                                                                                                                                                                                                                                                                                                                                                                                                                                                                                                                                                                                                                                                                                                                                                                                    |

1  
2  
3  
4  
5  
6  
7  
8  
9  
10  
11  
12  
13  
14  
15  
16  
17  
18  
19  
20  
21  
22  
23  
24  
25  
26  
27  
28  
29  
30  
31  
32  
33  
34  
35  
36  
37  
38  
39  
40  
41  
42  
43  
44  
45  
46  
47  
48  
49  
50  
51  
52  
53  
54  
55  
56  
57  
58  
59  
60

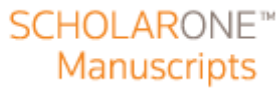

1  
2  
3 **Persistence with dual antiplatelet therapy after percutaneous coronary intervention**  
4  
5 **for ST-Segment-Elevation Acute Coronary Syndrome. A population-based cohort**  
6  
7 **study in Catalonia (Spain)**  
8  
9

10  
11 Aida Ribera<sup>1,2</sup>, PhD; Ignacio Ferreira-González<sup>1,2</sup>, MD PhD; Josep Ramón Marsal<sup>1,2</sup>, PhD;  
12  
13 Gerard Oristrell<sup>1,2</sup>, MD Maria Teresa Faixedas<sup>3</sup>, MD; Alba Rosas<sup>4</sup>, PhD; Helena Tizón-  
14  
15 Marcos<sup>5</sup>, MD; Sergio Rojas<sup>6</sup>, MD; Carlos Labata<sup>7</sup>, MD; Mérida Cárdenas<sup>8</sup>, MD; Silvia  
16  
17 Homs<sup>9</sup>, MD; Carlos Tomás-Querol <sup>10</sup>, MD; Joan Garcia-Picart<sup>11</sup>, MD; Joan A. Gomez-  
18  
19 Hospital<sup>12</sup>, MD, PhD; Jose Ignacio Pijoan<sup>2,13</sup>, MD PhD; Monica Masotti<sup>14</sup>, MD; Josepa  
20  
21 Mauri <sup>4,7</sup>, MD PhD; David García-Dorado<sup>1</sup>, MD PhD  
22  
23

24  
25  
26 On behalf of the VESA Study and Codi IAM Investigators  
27

- 28 1. Cardiology Department, Vall d'Hebrón Hospital, Vall d'Hebron Research  
29 Institute (VHIR) and Universitat Autònoma de Barcelona. Barcelona, Spain  
30
- 31 2. CIBER de Epidemiología y Salud Pública (CIBERESP). Spain  
32
- 33 3. Servei Català de la Salut, Catalonia, Spain  
34
- 35 4. Departament de Salut, Generalitat de Catalunya, Catalonia, Spain.  
36
- 37 5. Cardiology Department, Hospital del Mar, and Heart Diseases Biomedical  
38 Research Group and IMIM (Hospital del Mar Medical Research Institute), and  
39 Faculty of Medicine, Universitat Autònoma de Barcelona. Spain  
40
- 41 6. Cardiology Department, Hospital Universitari de Tarragona Joan XXIII, IISPV,  
42 and Universidad Rovira Virgili. Tarragona. Spain.  
43
- 44 7. Cardiology Department, Hospital German Trias i Pujol. Barcelona. Spain.  
45
- 46 8. Cardiology Department, Hospital Josep Trueta. Girona. Spain.  
47
- 48 9. Cardiology Department, Hospital Mútua de Terrassa. Barcelona. Spain.  
49
- 50 10. Cardiology Department, Hospital Arnau de Villanova. Lleida. Spain.  
51  
52  
53  
54  
55  
56  
57  
58  
59  
60

1  
2  
3 11. Cardiology Department, Hospital de la Santa Creu i Sant Pau. Barcelona. Spain.  
4

5 12. Cardiology Department, Hospital de Bellvitge. Barcelona. Spain  
6

7  
8 13. Clinical Epidemiology Unit, Hospital Universitario Cruces/BioCruces Health  
9  
10 Research Insitute, Bilbao. Spain  
11

12  
13 14. Cardiology Department, Hospital Clínic, Barcelona. Spain.  
14  
15  
16  
17

18  
19 **Corresponding author**

20  
21  
22 Ignacio Ferreira-González. Cardiovascular Epidemiology Unit. Cardiology Department.  
23

24 University Hospital Vall d'Hebron. Psg. Vall d'Hebron, 119-129 08035 Barcelona. Spain  
25

26  
27 [nachoferreira@secardiologia.es](mailto:nachoferreira@secardiologia.es)  
28

29 tel. 932746177  
30  
31  
32  
33

34 **Word count:** 4037  
35

36 **Keywords:** dual antiplatelet therapy, persistence with treatment, ST-elevation  
37  
38 myocardial infarction, percutaneous coronary intervention  
39  
40  
41  
42  
43  
44  
45  
46  
47  
48  
49  
50  
51  
52  
53  
54  
55  
56  
57  
58  
59  
60

## ABSTRACT

**Objectives:** Guidelines recommending 12 months dual antiplatelet therapy (DAPT) in patients with ST-elevation acute coronary syndrome (STEACS) undergoing percutaneous coronary intervention (PCI) were published in year 2012. We aimed to describe the influence of guidelines implementation on the trend in 12-month persistence with DAPT between 2010 and 2015 and to evaluate its relationship with DAPT duration regimens recommended at discharge from PCI hospitals.

**Design:** Observational study based on region-wide registry data linked to pharmacy billing data for DAPT follow up.

**Setting.** All PCI hospitals (10) belonging to the AMI-Code network in Catalonia (Spain)

**Participants:** 10,711 STEACS patients undergoing PCI between 2010 and 2015 were followed up.

**Primary and secondary outcome measures:** Primary outcome was 12 month persistence with DAPT. Calendar year quarter, publication of guidelines; DAPT duration regimen recommended in the hospital discharge report, baseline patient characteristics and significant interactions were included in mixed effects logistic regression based interrupted time-series models. **Results:** The proportion of patients on-DAPT at 12 months increased from 58% (56-60) in 2010 to 73% (71-75) in 2015. The rate of 12-months persistence with DAPT significantly increased after the publication of clinical guidelines with a time lag of one year (OR=1.20; 95% CI: 1.11-1.30). A higher risk profile, more extensive and complex coronary disease, use of drug-eluting stents (OR=2.02; 95% CI: 1.61-2.53) and a 12-months DAPT regimen recommendation at discharge from the PCI hospital (OR=5.92; 95% CI: 3.34-10.52) were associated with 12-months persistence. **Conclusion:** Persistence with 12-month DAPT has increased

1  
2  
3 since publication of clinical guidelines. Even though most patients were discharged on  
4  
5 DAPT, only 73% with potential indication were on-DAPT 12 months after PCI. A  
6  
7  
8 guideline-based recommendation at PCI hospital discharge was highly associated with  
9  
10 full persistence with DAPT. Establishing evidence-based, common prescribing criteria  
11  
12  
13 across hospitals in the AMI-network would favour adherence and reduce variability.  
14  
15  
16  
17

### 18 **Strengths and limitations of this study**

- 19  
20  
21 • The study describes the trends in persistence with DAPT during 2010-2015 in a  
22  
23 region-wide unselected comprehensive cohort of patients using administrative  
24  
25 data linked to a clinical registry
- 26  
27  
28 • It also evaluates the impact of the DAPT duration recommended at the PCI  
29  
30 hospital discharge on 12-months persistence
- 31  
32  
33 • Limitations of using observational registry data include the possibility of coding  
34  
35 errors and the inability to accurately identify specific contraindications for  
36  
37 treatment or other patient characteristics that might be relevant for the study  
38  
39 aims
- 40  
41  
42  
43 • The use of pharmacy refill data as a proxy of patients adherence and  
44  
45 persistence has also limitations which have been extensively described  
46  
47  
48  
49  
50

### 51 **Study funding**

52  
53  
54 The study was supported by Instituto de Salud Carlos III grand number PI13/00399 and  
55  
56 the Fundació la Marató de TV3 grand number 430/U/2015. The funders did not have  
57  
58 any role in the study design and development.  
59  
60



### Competing interest statement

All authors have completed the ICMJE uniform disclosure form at [http://www.icmje.org/coi\\_disclosure.pdf](http://www.icmje.org/coi_disclosure.pdf) and declare: no support from any organisation for the submitted work; no financial relationships with any organisations that might have an interest in the submitted work in the previous three years, no other relationships or activities that could appear to have influenced the submitted work

For peer review only

## Introduction

The need of dual antiplatelet therapy (DAPT) combining aspirin and an ADP-receptor blocker for at least 12 months in patients with ST-elevation acute coronary syndrome (STEACS) undergoing percutaneous coronary intervention (PCI) is well established and was incorporated into clinical guidelines in 2012[1,2].

Adherence of patients to this strategy is crucial to ensure its efficacy. Adherence to medication is usually defined[3] as the extent to which patients take medications as prescribed by their health care providers and persistence is defined as time from initiation to discontinuation of a therapy. Patients' persistence with DAPT may be influenced by several factors but will depend strongly on whether they ultimately receive a correct prescription from their physicians in the primary care setting. Patients may receive recommendations from various health providers at different stages of their process of care, from the interventionist cardiologist to their primary physician. It could be hypothesized that the last would tend to relay on the recommendation of the more specialized health professional. Thus, one potential determinant of patient's persistence with DAPT for at least 12 months is the instructions provided in the discharge report of the hospital where the patient was attended during the acute phase.

In Catalonia, an autonomous region of Spain, the acute care of STEACS is organized through a region-wide network, the Acute Myocardial Infarction (AMI) Code, to derive patients with suspected STEACS to one of the 10 reference hospitals with PCI capability. Performance of the AMI Code is prospectively and exhaustively registered[4,5], providing an appropriate tool for quality evaluation. The Catalan

1  
2  
3 Health Information System systematically registers, among other, data on pharmacy  
4 refills. Pharmacy billing data, although indirect, is an accepted method for evaluating  
5 persistence with treatment in large patient cohorts[3,6].  
6  
7  
8  
9

10 The aims of the present study were: first, to describe persistence with DAPT for at least  
11 12 months in patients with STEACS undergoing PCI from 2010 to 2015; second, to  
12 evaluate the influence of publication of guidelines incorporatins this specific  
13 recommendation on increasing the rate of 12-monhts persistence along time; and  
14 third, to evaluate the association of the DApT duration recommended at the PCI  
15 hospital discharge with patients' persistence with treatment for at least 12 months.  
16  
17  
18  
19  
20  
21  
22  
23  
24  
25  
26

## 27 **Methods**

### 28 *Data sources*

29  
30  
31 Data were obtained through the Public Data Analysis for Health Research and  
32 Innovation Program (PADRIS). The PADRIS allows access to information from different  
33 sources on public healthcare resources usage for the population of Catalonia linked at  
34 the patient level with warranted accomplishment of ethical principles. Specifically, for  
35 the present study we linked data of the pharmacy billing registry with the AMI Code  
36 Registry. The AMI Code registry was launched in 2010 to evaluate performance of the  
37 AMI Code [4,5]. Exhaustiveness and quality of data is assessed periodically (see  
38 supplemental methods for details). The database belongs to the Catalan Department  
39 of Health and includes demographic, clinical, and therapeutic data for each episode of  
40 hospitalization for STEACS. It conforms to the ethical and legal requirements for  
41  
42  
43  
44  
45  
46  
47  
48  
49  
50  
51  
52  
53  
54  
55  
56  
57  
58  
59  
60

1  
2  
3 research purposes. The study obtained ethics approval from the Vall d'Hebron Clinical  
4  
5 Research Ethics Committee.  
6

7  
8 The registry was completed for the purpose of the present analysis with retrospective  
9  
10 collection of additional specific data: diseased vessels, responsible vessel, stent type,  
11  
12 number of stents. The recommendation of antithrombotic drugs was also collected *ad*  
13  
14 *hoc* for the study from the discharge report. The recommendation of DAPT was  
15  
16 defined as the recommendation of Acetylsalicylic acid (ASA) and clopidogrel, prasugrel  
17  
18 or ticagrelor for specified periods. If the recommended duration of DAPT was not  
19  
20 specified, the discharge recommendation pattern was classified as "unspecified". A  
21  
22 local investigator at each center performed the specific retrospective data collection.  
23  
24  
25

26  
27 History of major haemorrhage, neoplasia, renal disease, heart failure, peripheral  
28  
29 arterial disease and atrial fibrillation, were obtained from minimum basic data set  
30  
31 (MBDS) diagnoses coded in hospitalization episodes occurring in the previous three  
32  
33 months before index hospitalization. Major haemorrhage was defined as: a diagnosis  
34  
35 of digestive bleeding in any diagnostic position (primary or secondary) together with a  
36  
37 procedure code for endoscopic treatment or for transfusion of blood products, or a  
38  
39 diagnosis of haemorrhagic stroke, or a diagnosis of intraocular haemorrhage, or a  
40  
41 diagnosis of other types of haemorrhage together with a procedure code for  
42  
43 transfusion of blood products. Major ischemic events (AMI or stroke) and major  
44  
45 haemorrhage during the 12 months following the index episode were obtained in the  
46  
47 same way. Mortality during the 12 months following the index episode was obtained  
48  
49 from the insured registry status.  
50  
51  
52  
53  
54  
55  
56  
57  
58  
59  
60

1  
2  
3 Drug treatment during the 12-month post-discharge follow up was obtained from the  
4  
5 pharmacy billing registry. ICD9 and ATC codes used for the identification of study  
6  
7 variables are listed in the supplemental tables 1 and 2.  
8  
9

### 10 11 12 13 14 ***Study population***

15  
16 We included all consecutive patients who survived a STEACS between January 2010  
17  
18 and December 2015, received primary or post fibrinolysis PCI in one of the 10  
19  
20 reference hospitals of the AMI Code network, were discharged home or transferred to  
21  
22 another hospital and survived at least one month after AMI. New episodes of STACS  
23  
24 occurring to the same patients during the study period were only accounted as follow  
25  
26 up events. Patients with likely contraindication for DAPT (history of major bleeding or  
27  
28 neoplasm in the three months prior to the index episode and patients requiring  
29  
30 anticoagulation) were excluded.  
31  
32  
33  
34  
35  
36  
37  
38

### 39 ***Persistence with treatment***

40  
41 DAPT was defined as the concomitant use of ASA and a P2Y<sub>12</sub> antagonist. Persistence  
42  
43 with DAPT was estimated by identification of consecutive months with pharmacy refills  
44  
45 with one container of each agent in the 12-month period after hospital discharge.  
46  
47 Because pharmacy billing is registered in a monthly basis and the exact day of  
48  
49 dispensation is unknown, we considered that a monthly dispensation until at least  
50  
51 month 11 after the index episode would approximate a 12-months treatment period. If  
52  
53 more than one container were dispensed in one month, the excess containers were  
54  
55 pulled along the following months. Non-persistence was defined as either  
56  
57  
58  
59  
60

1  
2  
3 discontinuation or a break in therapy of at least two months after pulling along the  
4  
5 excess containers. To describe persistence over the whole study period we estimated  
6  
7 the proportion of patients alive and within the 12 months after discharge window who  
8  
9 were on treatment on each month[7].  
10  
11  
12

13  
14 The primary outcome was a patients' persistence with DAPT for 12 months following  
15  
16 discharge (or in other words, patients withdrawing both agents from the pharmacy  
17  
18 until at least month 11).  
19  
20  
21

### 22 23 **Statistical analysis**

24  
25 We compared baseline characteristics between patients persisting with DAPT for at  
26  
27 least 12 months and patients withdrawing DAPT before 12 months with chi square test  
28  
29 or t test when appropriate. We tested for trends in patient's characteristics along  
30  
31 calendar year of discharge for the index procedure with Jonckheere-Terpstra test for  
32  
33 differences between ordered categories.  
34  
35  
36

37  
38 To evaluate the influence of time, guidelines publication and the DAPT duration  
39  
40 recommended in the PCI hospital discharge report we modelled logistic regression  
41  
42 based interrupted time-series analysis[8], adjusting for baseline characteristics. As a  
43  
44 first step, because it is expected that guidelines publication influences practice with a  
45  
46 time delay, we plotted the proportion of patients persisting on-DAPT for 12 months by  
47  
48 year quarter of discharge from the PCI hospital and we tested models with a slope  
49  
50 change (indicating the start of guidelines implementation) at different lag periods after  
51  
52 publication of the European clinical guidelines (last quarter of 2012). Once the lag  
53  
54 period between guidelines publication and implementation of recommendations was  
55  
56 estimated we included patient characteristics and second or third level interactions of  
57  
58  
59  
60

1  
2  
3 each characteristic with year quarter and moment of implementation. We coded time  
4  
5 ( $T$ ) as the time elapsed since the publication of guidelines plus the lag period (in  
6  
7 quarters) and a dummy variable ( $X_t$ ) indicating the pre-implementation period (coded  
8  
9 0) or the post-implementation period (coded 1)[9].  
10  
11  
12  
13  
14

15 The standard model specification was the following:  
16

$$17 \quad \text{logit}(Y_t) = \beta_0 + \beta_1 T + \beta_2 X_t + \beta_3 TX_t$$

18  
19 Where  $\beta_0$  represents the baseline level at  $T = 0$ ,  $\beta_1$  is interpreted as the change in  
20  
21 outcome associated with a time unit (quarter) increase (representing the underlying  
22  
23 pre-implementation trend),  $\beta_2$  is the level change following the implementation and  
24  
25  $\beta_3$  indicates the slope change following the implementation (using the interaction  
26  
27 between time and implementation:  $TX_t$ ). Additional terms can be added to model the  
28  
29 effect of other covariables and their interactions with  $T$  and  $X_t$  and to include random  
30  
31 effects. Note that we set  $T = 0$  at the quarter where we observed a significant change  
32  
33 in the slope at a lag time after guidelines publication.  
34  
35  
36  
37  
38  
39  
40  
41  
42

43 We took into account the clustered structure of data with patients being treated and,  
44  
45 most importantly, with recommendations on DAPT duration being provided in  
46  
47 different hospitals, by introducing random effects in the logistic regression models.  
48

49 . We tested whether models including random intercept for hospital and random  
50  
51 slopes for each independent variable were significant using a deviance –based test of  
52  
53 hypothesis.  
54  
55

56 Variable selection for multilevel modelling was based on the bivariate associations  
57  
58 with the rate of each dependent variable. Candidate individual variables were those  
59  
60

1  
2  
3 described in tables 1 and 2. Type of antiplatelet drug was not included in the  
4  
5 multivariable analysis because it was highly correlated with the year of episode, as new  
6  
7 antiplatelet agents (ticagrelor and prasugrel) were introduced later during the study  
8  
9 period. We retained in the final model all variables with a p value<0.2.  
10  
11

12  
13 Plots of predicted probability values were used to show marginal effects of variables of  
14  
15 interest and variability between centres.  
16  
17

### 18 19 20 ***Sensitivity analyses***

21  
22 Because a substantial proportion of patients were returned to their reference hospital  
23  
24 and because it was unknown whether the DAPT duration recommendation was  
25  
26 changed at discharge from the second hospital, we performed sensitivity analyses  
27  
28 excluding these patients. Additionally, because ischemic and haemorrhagic events  
29  
30 occurring during follow up would change the treatment length, sensitivity analyses  
31  
32 were also performed by excluding patients suffering any vascular event during follow  
33  
34 up.  
35  
36  
37  
38  
39  
40  
41

### 42 ***Patient and Public Involvement***

43  
44 The present study did not involve individual patients or public agencies.  
45  
46  
47  
48

### 49 **Results**

50  
51 After excluding patients with likely contraindication for DAPT (figure 1), we identified  
52  
53 10,711 STEACS patients undergoing PCI who were potential candidates to receive  
54  
55 DAPT for at least 12 months and survived for at least one month after discharge. 631  
56  
57 (5.9%) patients experienced an ischemic major event (AMI or stroke) within 12 months  
58  
59  
60



1  
2  
3 after the index episode, 100 (0.9%) had a major haemorrhage and 280 (2.6%) died  
4  
5 between one and 12 months after the index episode. After excluding patients who  
6  
7 died or were lost to follow up and patients with errors in quarter allocations, 10,262  
8  
9 patients remained for analysis.  
10  
11

12  
13 Table 1 shows characteristics of study patients depending on persistence with DAPT.  
14  
15 Patients persisting for at least 12 months had higher prevalence of cardiovascular risk  
16  
17 factors (hypertension, diabetes and hypercholesterolemia), higher rate of a previous  
18  
19 history of cardiovascular disease, more extended coronary disease, higher rate of drug  
20  
21 eluting stents implantation and slightly higher ischemic risk (as measured with the  
22  
23 DAPT score[10]). Persisting patients were more often transferred to their reference  
24  
25 hospital and had had a prescription for a longer DAPT period at discharge from the PCI  
26  
27 hospital and had had a prescription for a longer DAPT period at discharge from the PCI  
28  
29 hospital.  
30  
31  
32  
33  
34  
35  
36  
37  
38  
39  
40  
41  
42  
43  
44  
45  
46  
47  
48  
49  
50  
51  
52  
53  
54  
55  
56  
57  
58  
59  
60

Table 1. Characteristics of study patients according to DAPT persistence during follow up.

|                                                   | DAPT <12 months<br>(n=3684) |               | DAPT ≥ 12 months<br>(n=6578) |               | Total<br>(n=10262) |               | P value |
|---------------------------------------------------|-----------------------------|---------------|------------------------------|---------------|--------------------|---------------|---------|
|                                                   | N                           | n (%)         | N                            | n (%)         | N                  | n (%)         |         |
| Age                                               | 3684                        | 61.19 ± 13.21 | 6578                         | 61.18 ± 12.38 | 10262              | 61.19 ± 12.69 | 0.578   |
| Gender (Female)                                   | 3684                        | 765 (20.8%)   | 6578                         | 1319 (20.1%)  | 10262              | 2084 (20.3%)  | 0.399   |
| Smoke (Y)                                         | 3684                        | 1774 (48.2%)  | 6578                         | 3042 (46.2%)  | 10262              | 4816 (46.9%)  | 0.064   |
| Hypertension (Y)                                  | 3684                        | 1622 (44%)    | 6578                         | 3142 (47.8%)  | 10262              | 4764 (46.4%)  | <0.001  |
| Diabetes (Y)                                      | 3684                        | 647 (17.6%)   | 6578                         | 1298 (19.7%)  | 10262              | 1945 (19%)    | 0.008   |
| Hypercholesterolaemia (Y)                         | 3684                        | 1291 (35%)    | 6578                         | 2678 (40.7%)  | 10262              | 3969 (38.7%)  | <0.001  |
| Polyvascular disease (Y)*                         | 3684                        | 530 (14.4%)   | 6578                         | 1048 (15.9%)  | 10262              | 1578 (15.4%)  | 0.038   |
| Previous stroke or transient ischaemic attack (Y) | 3684                        | 101 (2.7%)    | 6578                         | 172 (2.6%)    | 10262              | 273 (2.7%)    | 0.704   |
| Previous acute myocardial infarction (Y)          | 3684                        | 265 (7.2%)    | 6578                         | 570 (8.7%)    | 10262              | 835 (8.1%)    | 0.010   |
| Previous percutaneous coronary intervention (Y)   | 3684                        | 194 (5.3%)    | 6578                         | 482 (7.3%)    | 10262              | 676 (6.6%)    | <0.001  |
| Previous by-pass surgery (Y)                      | 3684                        | 20 (0.5%)     | 6578                         | 85 (1.3%)     | 10262              | 105 (1%)      | <0.001  |
| History of peripheral arteriopathy (Y)            | 3684                        | 153 (4.2%)    | 6578                         | 276 (4.2%)    | 10262              | 429 (4.2%)    | 0.957   |
| Comorbidity (Y)†                                  | 3684                        | 462 (12.5%)   | 6578                         | 885 (13.5%)   | 10262              | 1347 (13.1%)  | 0.191   |
| Hepatopathy (Y)                                   | 3684                        | 48 (1.3%)     | 6578                         | 56 (0.9%)     | 10262              | 104 (1%)      | 0.030   |
| History of Renal Impairment (Y)                   | 3684                        | 185 (5%)      | 6578                         | 320 (4.9%)    | 10262              | 505 (4.9%)    | 0.741   |
| History of Heart Failure (Y)                      | 3684                        | 272 (7.4%)    | 6578                         | 583 (8.9%)    | 10262              | 855 (8.3%)    | 0.009   |
| Affected number of vessels ≥2 (Y)                 | 3684                        | 1275 (34.6%)  | 6578                         | 2731 (41.5%)  | 10262              | 4006 (39%)    | <0.001  |
| Number of treated vessels                         | 3613                        | 1.03 ± 0.21   | 6516                         | 1.06 ± 0.26   | 10129              | 1.05 ± 0.25   | <0.001  |
| Drug eluting stent (Y)                            | 3684                        | 572 (15.5%)   | 6578                         | 2704 (41.1%)  | 10262              | 3276 (31.9%)  | <0.001  |
| DAPT Score Points                                 | 3684                        | 1.20 ± 1.20   | 6578                         | 1.28 ± 1.17   | 10262              | 1.25 ± 1.18   | <0.001  |
| Discharged home (Y)                               | 3684                        | 2233 (60.6%)  | 6578                         | 3672 (55.8%)  | 10262              | 5905 (57.5%)  | <0.001  |
| DAPT recommendation at discharge                  | 3684                        |               | 6578                         |               | 10262              |               | <0.001  |
| 1 month                                           |                             | 875 (23.8%)   |                              | 295 (4.5%)    |                    | 1170 (11.4%)  |         |
| <12 months                                        |                             | 385 (10.5%)   |                              | 173 (2.6%)    |                    | 558 (5.4%)    |         |
| ≥12months                                         |                             | 1522 (41.3%)  |                              | 4732 (71.9%)  |                    | 6254 (60.9%)  |         |
| unknown                                           |                             | 902 (24.5%)   |                              | 1378 (20.9%)  |                    | 2280 (22.2%)  |         |

\*Polyvascular disease was defined as presence of at least two of the following conditions: previous myocardial infarction or percutaneous coronary or surgical revascularization; history of peripheral arteriopathy; history of stroke or transient ischaemic attack. †Comorbidity was defined as presence of one of the following conditions: hepatopathy, history of renal impairment, history of heart failure

1  
2  
3 The rate of patients on-DAPT after discharge from the PCI hospital was 91% (95% CI:  
4 90-91) without relevant differences between years (supplemental figure 1). The  
5  
6 proportion of patients on-DAPT at 12 months significantly increased from 58% (56-61)  
7  
8 in 2010 to 73% (71-75) in 2015. The larger increase in 12-month persistence was  
9  
10 observed between 2014 (64% [62-66]) and 2015, two years after the publication of  
11  
12 clinical guidelines.  
13  
14  
15  
16

17 Some baseline characteristics showed a temporal trend over the study period 2010-  
18  
19 2015 (table 2). The prevalence of cardiovascular risk factors (smoking, hypertension  
20  
21 and hypercholesterolemia) and comorbidities increased slightly. Likewise, the number  
22  
23 of treated vessels, the rate of drug eluting stents implantation also increased with  
24  
25 time.  
26  
27  
28  
29  
30  
31  
32  
33  
34  
35  
36  
37  
38  
39  
40  
41  
42  
43  
44  
45  
46  
47  
48  
49  
50  
51  
52  
53  
54  
55  
56  
57  
58  
59  
60

Table 2. Characteristics of study patients by year of discharge for the index admission.

|                                               | 2010 (n=1537) | 2011 (n=1628) | 2012 (n=1760) | 2013 (n=1779) | 2014 (n=1779) | 2015 (n=1779) | P value |
|-----------------------------------------------|---------------|---------------|---------------|---------------|---------------|---------------|---------|
| Age                                           | 61 ± 12.92    | 61.01 ± 13.09 | 60.97 ± 12.52 | 61.27 ± 12.4  | 61.24 ± 12.72 | 61.58 ± 12.53 | 0.325   |
| Gender                                        | 310 (20.2%)   | 311 (19.1%)   | 372 (21.1%)   | 359 (20.2%)   | 352 (19.8%)   | 380 (21.4%)   | 0.389   |
| Smoke                                         | 686 (44.6%)   | 754 (46.3%)   | 811 (46.1%)   | 839 (47.2%)   | 840 (47.2%)   | 886 (49.8%)   | 0.004   |
| Hypertension                                  | 674 (43.9%)   | 729 (44.8%)   | 808 (45.9%)   | 838 (47.1%)   | 844 (47.4%)   | 871 (49%)     | 0.001   |
| Diabetes                                      | 296 (19.3%)   | 319 (19.6%)   | 340 (19.3%)   | 327 (18.4%)   | 325 (18.3%)   | 338 (19%)     | 0.438   |
| Hypercholesterolaemia                         | 541 (35.2%)   | 621 (38.1%)   | 648 (36.8%)   | 710 (39.9%)   | 742 (41.7%)   | 707 (39.7%)   | <0.001  |
| Polyvascular disease*                         | 232 (15.1%)   | 253 (15.5%)   | 301 (17.1%)   | 259 (14.6%)   | 278 (15.6%)   | 255 (14.3%)   | 0.370   |
| Previous stroke or transient ischaemic attack | 42 (2.7%)     | 32 (2%)       | 45 (2.6%)     | 40 (2.2%)     | 65 (3.7%)     | 49 (2.8%)     | 0.126   |
| Previous acute myocardial infarction          | 127 (8.3%)    | 142 (8.7%)    | 163 (9.3%)    | 151 (8.5%)    | 127 (7.1%)    | 125 (7%)      | 0.029   |
| Previous percutaneous coronary intervention   | 94 (6.1%)     | 104 (6.4%)    | 123 (7%)      | 116 (6.5%)    | 118 (6.6%)    | 121 (6.8%)    | 0.485   |
| Previous by-pass surgery                      | 10 (0.7%)     | 16 (1%)       | 17 (1%)       | 19 (1.1%)     | 18 (1%)       | 25 (1.4%)     | 0.056   |
| History of peripheral arteriopathy            | 51 (3.3%)     | 70 (4.3%)     | 93 (5.3%)     | 66 (3.7%)     | 86 (4.8%)     | 63 (3.5%)     | 0.876   |
| Comorbidity†                                  | 155 (10.1%)   | 190 (11.7%)   | 233 (13.2%)   | 243 (13.7%)   | 266 (15%)     | 260 (14.6%)   | <0.001  |
| Hepatopathy                                   | 16 (1%)       | 12 (0.7%)     | 24 (1.4%)     | 24 (1.3%)     | 13 (0.7%)     | 15 (0.8%)     | 0.578   |
| History of Renal Impairment                   | 70 (4.6%)     | 75 (4.6%)     | 71 (4%)       | 86 (4.8%)     | 89 (5%)       | 114 (6.4%)    | 0.009   |
| History of Heart Failure                      | 80 (5.2%)     | 118 (7.2%)    | 154 (8.8%)    | 159 (8.9%)    | 187 (10.5%)   | 157 (8.8%)    | <0.001  |
| Affected number of vessels ≥2                 | 594 (38.6%)   | 617 (37.9%)   | 679 (38.6%)   | 707 (39.7%)   | 688 (38.7%)   | 721 (40.5%)   | 0.188   |
| Number of treated vessels                     | 1.04 ± 0.25   | 1.03 ± 0.23   | 1.05 ± 0.26   | 1.05 ± 0.24   | 1.05 ± 0.26   | 1.06 ± 0.24   | 0.003   |
| Drug eluting stent                            | 462 (30.1%)   | 388 (23.8%)   | 472 (26.8%)   | 493 (27.7%)   | 652 (36.6%)   | 809 (45.5%)   | <0.001  |
| DAPT Score Points                             | 1.24 ± 1.2    | 1.24 ± 1.19   | 1.26 ± 1.17   | 1.26 ± 1.17   | 1.22 ± 1.16   | 1.28 ± 1.19   | 0.435   |
| Discharged home                               | 961 (62.5%)   | 951 (58.4%)   | 933 (53%)     | 1042 (58.6%)  | 959 (53.9%)   | 1059 (59.5%)  | 0.041   |
| DAPT recommendation at discharge              |               |               |               |               |               |               | <0.001  |
| 1 month                                       | 281 (18.3%)   | 259 (15.9%)   | 243 (13.8%)   | 181 (10.2%)   | 135 (7.6%)    | 71 (4%)       |         |
| <12 months                                    | 150 (9.8%)    | 137 (8.4%)    | 100 (5.7%)    | 69 (3.9%)     | 65 (3.7%)     | 37 (2.1%)     |         |
| ≥12 months                                    | 792 (51.5%)   | 871 (53.5%)   | 975 (55.4%)   | 1086 (61%)    | 1154 (64.9%)  | 1376 (77.3%)  |         |

|         | <b>2010 (n=1537)</b> | <b>2011 (n=1628)</b> | <b>2012 (n=1760)</b> | <b>2013 (n=1779)</b> | <b>2014 (n=1779)</b> | <b>2015 (n=1779)</b> | <b>P value</b> |
|---------|----------------------|----------------------|----------------------|----------------------|----------------------|----------------------|----------------|
| unknown | 314 (20.4%)          | 361 (22.2%)          | 442 (25.1%)          | 443 (24.9%)          | 425 (23.9%)          | 295 (16.6%)          |                |

\*Polyvascular disease was defined as presence of at least two of the following conditions: previous myocardial infarction or percutaneous coronary or surgical revascularization; history of peripheral arteriopathy; history of stroke or transient ischaemic attack. †Comorbidity was defined as presence of one of the following conditions: hepatopathy, history of renal impairment, history of heart failure

For peer review only

1  
2  
3 The overall rate of explicit DAPT recommendation for at least 12 months in the  
4 hospital discharge reports was 51% (49-53) in 2010 and increased to 77% (75-79) in  
5  
6  
7  
8 2015 but it was highly variable between hospitals (supplemental figure 2).

9  
10 Figure 2 shows the observed proportion of patients persisting with DAPT for at least 12  
11  
12  
13 month at each time point and the interrupted time series model fitted after setting a  
14  
15 one year lag period from publication to implementation of guidelines.

16  
17 In interrupted time series logistic regression (Table 3), variables showing association  
18  
19  
20 with 12 months persistence on DAPT were two or more diseased vessels, higher  
21  
22  
23 number of stents implanted, receiving drug eluting stents, hypercholesterolemia, a  
24  
25  
26 previous surgical procedure and a recommendation of DAPT for a longer period at  
27  
28  
29 discharge from the PCI hospital. Guidelines implementation had a positive effect on  
30  
31  
32 persistence: a 20% increase in the odds of 12 months persistence each quarter after a  
33  
34  
35 lag of one year since publication. The effect of drug eluting stents was attenuated with  
36  
37  
38 time (OR for interaction: 0.97; 95%CI: 0.95-0.98) while the effect of prescription was  
39  
40  
41 attenuated with time after guidelines implementation (OR for the interaction 0.87,  
42  
43  
44 95%CI: 0.80-0.94 for a recommendation of  $\geq 12$  months and 0.89, 95%CI: 0.82-0.98 for  
45  
46  
47 an unknown recommendation). The effect of implantation of drug eluting stents and  
48  
49  
50 type of recommendation also varied between hospitals (significant random slopes).

Table 3. Factors associated with a persistence of at least 12 months as assessed with interrupted time series logistic regression model

| <b>Fixed effects</b>                                                                                  | <b>OR</b>       | <b>95% CI</b> | <b>P value</b> |
|-------------------------------------------------------------------------------------------------------|-----------------|---------------|----------------|
| Drug eluting stent                                                                                    | 2.02            | 1.61 - 2.53   | <0.001         |
| Number of stents                                                                                      | 1.21            | 1.12 - 1.31   | <0.001         |
| Recommendation at PCI hospital discharge (Ref. 1 month)                                               | 1.00            |               |                |
| <12 months                                                                                            | 1.67            | 0.88 - 3.17   | 0.120          |
| ≥12 months                                                                                            | 5.92            | 3.34 - 10.52  | <0.001         |
| unknown                                                                                               | 2.23            | 0.82 - 6.02   | 0.115          |
| Hypercholesterolemia                                                                                  | 1.19            | 1.08 - 1.31   | <0.001         |
| Previous by-pass surgery                                                                              | 1.81            | 1.06 - 3.07   | 0.029          |
| Two or more treated vessels                                                                           | 1.20            | 1.09 - 1.32   | <0.001         |
| Drug eluting stent * Time (quarter)                                                                   | 0.97            | 0.95 - 0.98   | <0.001         |
| Guidelines implementation                                                                             | 1.20            | 1.11 - 1.3    | <0.001         |
| Recommendation at PCI hospital discharge (Ref. 1 month) *<br>Time (quarter)*Guidelines implementation |                 |               |                |
| <12 months                                                                                            | 0.91            | 0.8 - 1.05    | 0.191          |
| ≥ 10 months                                                                                           | 0.87            | 0.8 - 0.94    | 0.001          |
| unknown                                                                                               | 0.89            | 0.82 - 0.98   | 0.013          |
| <b>Random effects</b>                                                                                 | <b>Variance</b> | <b>95% CI</b> |                |
| Random - Intercept                                                                                    | 0.46            | 0.11 – 5.16   |                |
| Random - Slopes                                                                                       |                 |               |                |
| Recommendation at PCI hospital discharge (Ref. 1 month)                                               |                 |               |                |
| <12 months                                                                                            | 0.38            | 0.15 – 4.21   |                |
| ≥12 months                                                                                            | 0.39            | 0.15 – 4.29   |                |
| unknown                                                                                               | 2.00            | 0.45 – 22.19  |                |
| Drug eluting stent                                                                                    | 0.09            | 0.02 – 1.00   |                |
| Adjusted ICC                                                                                          | 0.087           |               |                |

Results of sensitivity analyses, excluding patients with ischemic or haemorrhagic events during follow up, or excluding patients that were transferred to another centre after PCI were similar to the main analysis (Supplemental table 3).

The interaction between drug eluting stents and time can be seen in figure 3A. Because 12-months persistence increased with time in patients without drug eluting stents, the effect of type of stent is attenuated with time. The interaction of the recommendation pattern with time and guidelines implementation can be seen in figure 3B: 12-months persistence increased with time mainly in the subgroups with

1  
2  
3 shorter time specification in the discharge report and also in patients without a specific  
4  
5 recommendation, but this increase started after guidelines implementation (one year  
6  
7 after publication). Figure 3C shows a substantial reduction in the variability between  
8  
9 centres mainly due to an increase in the proportion of 12-months persistence in  
10  
11 patients attended in centres where the initial proportion was lower (significant  
12  
13 random intercept and slopes).  
14  
15  
16  
17  
18  
19

## 20 Discussion

21  
22 According to published guidelines, all STEACS patients undergoing PCI without  
23  
24 contraindication should be kept on DAPT for at least 12 months unless an event occurs  
25  
26 that precludes continuing with this treatment. In this observational region-wide study  
27  
28 we have found an increase in the proportion of patients on-DAPT at 12 months from  
29  
30 58 to 73% in the period from 2010 to 2015, with an accelerated rate starting in the  
31  
32 fourth quarter of 2013, one year after the publication of European guidelines.  
33  
34  
35

36  
37 We also found a high variability between hospitals in the adherence to guidelines  
38  
39 when recommending DAPT for at least 12 months which leads to substantial  
40  
41 differences between hospitals in the rate of patients persisting with the recommended  
42  
43 DAPT. The progressive increase in the overall rate of 12-months persistence was  
44  
45 accompanied by a substantial reduction of interhospital variability.  
46  
47  
48

49  
50 Likelihood of patients persisting with DAPT for one year is strongly related to the  
51  
52 instructions given at the PCI hospital discharge, as we observed a lower rate of 12-  
53  
54 month persistence in patients receiving a discharge DAPT recommendation for less  
55  
56 than 12 months. Although a causal direct relationship between the established  
57  
58 recommendation in the more specialised setting and the final prescription at the  
59  
60



1  
2  
3 primary care setting cannot be stated on the basis of observational data, this finding  
4  
5 suggests that prescribing physicians strongly rely on the first recommendation  
6  
7 specified at the discharge report in the PCI hospital. Therefore, hospital cardiologists  
8  
9 should be kept aware of their impact and encouraged to be clear and specific enough  
10  
11 when providing DAPT time recommendations in the discharge report form.  
12  
13

14  
15 The recommendation in clinical guidelines of DAPT for at least 12 months following  
16  
17 STEACS[1,2] was based on the duration of follow up of randomised clinical trials  
18  
19 designed for other purposes and[11–13], although a 12-month treatment seemed  
20  
21 reasonable [14], no randomized studies had been performed within the study period  
22  
23 aimed specifically at comparing 12 months DAPT with shorter periods in STEACS  
24  
25 patients receiving PCI and thus this recommendation might well be seen as somehow  
26  
27 arbitrary by some prescribers.  
28  
29  
30

31  
32 In 2015 the need for long term DAPT was reinforced by the recommendation of  
33  
34 extended DAPT beyond 12 months in patients with ACS receiving drug eluting  
35  
36 stents[15–17], but still safety concerns might induce some prescribers to be reluctant  
37  
38 to prolong DAPT, especially in patients with higher complexity[18]. Safety concerns  
39  
40 might also explain the high proportion of discharge reports with non-specified DAPT  
41  
42 period, which deserved special attention in our analyses. Cardiologists might be  
43  
44 reluctant to prescribe a specific duration of DAPT maybe fearing about the emergency  
45  
46 of events that increase the haemorrhagic risk at some point after discharge, thus  
47  
48 relaying on the follow up that will be made at the ambulatory setting. Our results  
49  
50 showing a high degree of persistence for patients without a specification of DAPT time  
51  
52 point out to the fact that this decision is not necessarily “incorrect”, and that health  
53  
54 providers coming later in the process of care are probably doing their job.  
55  
56  
57  
58  
59  
60

1  
2  
3 We might wonder whether the observed high variability between hospitals in the  
4 instructions provided about DAPT duration actually reflects suboptimal quality of care  
5 or confusion in the interpretation of international guidelines. In fact, although 2012  
6 ESC guidelines state that DAPT must be continued for 12 months after STEACS with a  
7 class of recommendation I, the level of evidence was established as C[1]. Thus, there  
8 was general agreement that a minimum of 12 months of DAPT is likely to be beneficial  
9 but based only on a consensus of experts or observational studies. Moreover, it is  
10 literally stated that the given recommendation on DAPT duration should be “with a  
11 strict minimum of 1 month for patients receiving BMS and 6 months for patients  
12 receiving DES”, with Class IC and IIb respectively. These messages, which ultimately  
13 reflected the lack of clinical trials aimed to answer the specific question about DAPT  
14 duration, could have induced a perception of arbitrariness leading to variability in  
15 clinical practice.  
16  
17  
18  
19  
20  
21  
22  
23  
24  
25  
26  
27  
28  
29  
30  
31  
32  
33

34 In fact, the optimal duration of DAPT has not yet been totally established in more  
35 contemporary clinical trials. The most recent randomized clinical trial conducted in  
36 patients with STEACS aimed to assess the question of 12-month vs a 6-month DAPT  
37 duration, showed that 6-month DAPT duration after primary PCI was non-inferior to  
38 12-month duration to prevent major cardiovascular events[19]. In another trial in the  
39 context of ACS, 12 months or longer DAPT duration versus 6 months was not  
40 associated with lower major cardiovascular events and total mortality[20].  
41  
42  
43  
44  
45  
46  
47  
48  
49  
50

51 Regardless the level of the evidence, one would expect that a Class I recommendation  
52 should be uniformly followed by clinicians. Moreover, as patient characteristics did not  
53 substantially differed across hospitals, we should expect a lower variability between  
54 hospitals. A large variation in individual country practices concerning the pattern of  
55  
56  
57  
58  
59  
60

1  
2  
3 DAPT duration after ACS has been described, suggesting that local systems are strong  
4  
5 drivers of DAPT duration[21]. These findings may imply that there is still room for  
6  
7 improvement in the quality of care of STEACS patients and that quality improvement  
8  
9 programs, whose efficacy and cost-effectiveness are still under evaluation, could be  
10  
11 useful to reduce variability in clinical practice[22]. This is of prime importance in the  
12  
13 context of the prescription of DAPT duration after ACS in which the clinician-driven  
14  
15 variability in prescription patterns adds to the different levels patients' adherence[21].  
16  
17 Higher atherosclerotic burden and increased ischemic risk was associated to better  
18  
19 persistence with DAPT. The need for 12-month DAPT schedules in patients treated  
20  
21 with drug eluting stents is clearly perceived by physicians but the magnitude of this  
22  
23 association varies largely between hospitals. This means that, even in clear indications,  
24  
25 there are different levels of adoption of emerging clinical recommendations in  
26  
27 hospitals belonging to the same AMI network.

28  
29 It is also apparent from our data that the speed of adoption of clinical guidelines is  
30  
31 different among hospitals and that an acceptable and generalised level of adherence is  
32  
33 only reached after two years of implementation. Similar trends have been found in  
34  
35 other contexts and earlier periods[23–28] reporting DAPT use between 60-80% at  
36  
37 discharge and between 25-75 % at one year. In this sense, together with other quality  
38  
39 improvement initiatives, the use of population-based registries to provide audit and  
40  
41 feedback could be useful to promote quicker and smoother adoption of clinical  
42  
43 practice guidelines[29].  
44  
45  
46  
47  
48  
49  
50  
51  
52  
53  
54

55  
56 There are a number of assumptions that might be questionable: A number of factors  
57  
58 have been described to contribute to underprescription[30]. The complete process of  
59  
60

1  
2  
3 care and the definite prescription at the ambulatory setting is poorly known for  
4  
5 individual patients and has not been considered in this study. Changes in treatment  
6  
7 prescription might be justified by the patients' varying conditions during follow up. We  
8  
9 assume that hospital recommendation influences final prescription, and consequently,  
10  
11 final adherence to guidelines, but it can also be that both "prescribers" facing the same  
12  
13 patient share the same criteria for prescription. I.e. the hospital cardiologist might  
14  
15 have decided to recommend DAPT for a shorter period to an elderly patient with other  
16  
17 comorbidities and suboptimal quality of life due to mild digestive symptoms, even if  
18  
19 her objective bleeding risk is not high; similarly, the primary physician or the  
20  
21 cardiologist at the primary care setting might have also decided to be less aggressive  
22  
23 for the same reasons, even without being influenced by the recommendation of the  
24  
25 first prescriber. This would probably explain a large amount of the strong relationship  
26  
27 between hospital recommendation and pharmacy dispensation. Moreover, although  
28  
29 effects were adjusted for patient characteristics and vascular events during follow up,  
30  
31 there might be other unmeasured reasons for deciding upon a shorter DAPT period  
32  
33 facing an individual patient.  
34  
35  
36  
37  
38  
39  
40

41  
42 In addition, the recommendation at PCI hospital discharge may not coincide with the  
43  
44 final hospital prescription in patients derived to another reference hospital after PCI.  
45  
46 However, results of sensitivity analyses excluding these patients did not differ  
47  
48 substantially from the results of the main analyses.  
49  
50

51  
52 The study was aimed to ascertain influence of guidelines on hospital recommendation  
53  
54 and its impact on patients' persistence with DAPT. The impact of persistence on  
55  
56 clinically relevant results is beyond the objective of the present study and will be  
57  
58 assessed in another article. Similarly, the study was not specifically aimed at a deep  
59  
60

1  
2  
3 assessment of determinants of adherence. This requires a detailed examination of the  
4  
5 social context and a detailed assessment of individual psychological factors[31].  
6  
7  
8  
9

## 10 **Conclusion**

11  
12 The study shows that 12-month DAPT persistence in revascularized patients with  
13 STEACS in Catalonia (Spain) has substantially increased between years 2010 to 2015  
14 especially since one year after the publication of European guidelines in 2012.  
15 Guidelines implementation was also followed by a substantial decrease in variability  
16 between centres. We have shown that instructions given at the PCI hospital discharge  
17 are strongly associated with persistence. Thus establishing common and rational  
18 prescribing criteria between hospitals in the STEACS-network may favour patients  
19 persistence with scheduled prescriptions and also reduce variability in clinicians'  
20 practices.  
21  
22  
23  
24  
25  
26  
27  
28  
29  
30  
31  
32  
33  
34  
35  
36  
37  
38  
39  
40  
41  
42  
43  
44  
45  
46  
47  
48  
49  
50  
51  
52  
53  
54  
55  
56  
57  
58  
59  
60

## 38 **Author contributions**

41 IFG, ARi, JRM conceived and designed the study; ARi, JRM and MTF participated in the  
42 acquisition and analysis of data; HTM, SR, CL, MC, SH, CTQ, JGP, JAGH and MM were  
43 responsible for data acquisition in their respective hospitals; ARi, IFG, JRM, GO, ARo,  
44 JIP, JM and DGD were involved in the interpretation of results; ARi and IFG wrote the  
45 manuscript and all other authors revised it critically and approved its final version  
46  
47  
48  
49  
50  
51  
52  
53  
54  
55  
56  
57  
58  
59  
60

The AMI-Code Registry Investigators (listed below) contribute to the functioning of the  
AMI code and to data acquisition for the AMI-Code Registry:

1  
2  
3 C. Carvajal, P. Martínez, RM. Lidón, J. Bañeras (Hospital Universitari de la Vall  
4  
5 d'Hebrón, Barcelona), J. Garcia-Picart (Hospital de la Santa Creu i Sant Pau, Barcelona),  
6  
7  
8 M. Massotti, G. Jiménez, M. Hernández, A. Regueiro (Hospital Clinic, Barcelona), J.  
9  
10 Basaganyas, P. Loma, M. Cardenas, E. Badosa, A. Fageda (Hospital Josep Trueta,  
11  
12 Girona) A. Ariza, C. García-Amigó, A. Cequier, A. Gómez-Hospital, G. Marín, J.  
13  
14 Maristany, V. Montoya (Hospital Universitari de Bellvitge, Hospitalet) , C. Labata, J.  
15  
16 Mauri, E. Fernández-Nofrerias, X. Carrillo, C. Garcia-Garcia, C. Oliete, (Hospital  
17  
18 Universitari Germans Trias i Pujol, Badalona) A. Bardaji, G. Bonet-Pineda, S. Rojas  
19  
20 (Hospital Joan XXIII, Tarragona). Juan F. Muñoz, F. Padilla, S. Homs (Hospital Mútua de  
21  
22 Terrassa, Terrassa), B. Baquerizo, L. Recasens, H. Tizon-Marcos (Hospital de Mar IMAS,  
23  
24 Barcelona), A. Bosch Gaya, F. Worner, L. Barta, M. Agustí, A. Gené (Hospital Arnau de  
25  
26 Vilanova, Lleida), X. Jimenez, A. Mora (Sistema d'Emergencies Mèdiques SEM SA,  
27  
28 Barcelona), MT. Faixedas, J. Jiménez, A. Rosas (Health Department. Generalitat de  
29  
30 Catalunya).

## References

- 1 Steg PG, James SK, Atar D, *et al.* ESC Guidelines for the management of acute myocardial infarction in patients presenting with ST-segment elevation: The Task Force on the management of ST-segment elevation acute myocardial infarction of the European Society of Cardiology (ESC). *Eur Heart J* 2012;**33**:2569–619. doi:10.1093/eurheartj/ehs215
- 2 O’Gara PT, Kushner FG, Ascheim DD, *et al.* 2013 ACCF/AHA Guideline for the Management of ST-Elevation Myocardial Infarction: A Report of the American College of Cardiology Foundation/American Heart Association Task Force on Practice Guidelines. *Circulation* 2013;**127**:e362–425. doi:10.1161/CIR.0b013e3182742cf6
- 3 Osterberg L, Blaschke T. Adherence to medication. *N Engl J Med* 2005;**353**:487–97. doi:10.1056/NEJMra050100
- 4 Carrillo X, Fernandez-Nofrerias E, Rodriguez-Leor O, *et al.* Early ST elevation myocardial infarction in non-capable percutaneous coronary intervention centres: *in situ* fibrinolysis vs. percutaneous coronary intervention transfer. *Eur Heart J* 2016;**37**:1034–40. doi:10.1093/eurheartj/ehv619
- 5 Regueiro A, Bosch J, Martín-Yuste V, *et al.* Cost-effectiveness of a European ST-segment elevation myocardial infarction network: results from the Catalan Codi Infart network. *BMJ Open* 2015;**5**:e009148. doi:10.1136/bmjopen-2015-009148
- 6 Swieczkowski D, Mogielnicki M, Cwalina N, *et al.* Medication adherence in patients after percutaneous coronary intervention due to acute myocardial infarction: From research to clinical implications. *Cardiol J* 2016;**23**:483–90.

- 1  
2  
3 doi:10.5603/CJ.a2016.0048  
4  
5  
6 7 Gislason GH, Rasmussen JN, Abildstrøm SZ, *et al.* Long-term compliance with  
7  
8 beta-blockers, angiotensin-converting enzyme inhibitors, and statins after acute  
9  
10 myocardial infarction. *Eur Heart J* 2006;**27**:1153–8.  
11  
12 doi:10.1093/eurheartj/ehi705  
13  
14  
15 8 Kontopantelis E, Doran T, Springate DA, *et al.* Regression based quasi-  
16  
17 experimental approach when randomisation is not an option: Interrupted time  
18  
19 series analysis. *BMJ* Published Online First: 2015. doi:10.1136/bmj.h2750  
20  
21  
22 9 Bernal JL, Cummins S, Gasparrini A. Interrupted time series regression for the  
23  
24 evaluation of public health interventions: A tutorial. *Int J Epidemiol* Published  
25  
26 Online First: 2017. doi:10.1093/ije/dyw098  
27  
28  
29  
30 10 Yeh RW, Secemsky EA, Kereiakes DJ, *et al.* Development and Validation of a  
31  
32 Prediction Rule for Benefit and Harm of Dual Antiplatelet Therapy Beyond 1 Year  
33  
34 After Percutaneous Coronary Intervention. *JAMA* 2016;**315**:1735.  
35  
36 doi:10.1001/jama.2016.3775  
37  
38  
39  
40 11 Yusuf S, Zhao F, Mehta SR, *et al.* Effects of Clopidogrel in Addition to Aspirin in  
41  
42 Patients with Acute Coronary Syndromes without ST-Segment Elevation. *N Engl J*  
43  
44 *Med* 2001;**345**:494–502. doi:10.1056/NEJMoa010746  
45  
46  
47 12 Wiviott SD, Braunwald E, McCabe CH, *et al.* Prasugrel versus Clopidogrel in  
48  
49 Patients with Acute Coronary Syndromes. *N Engl J Med* 2007;**357**:2001–15.  
50  
51 doi:10.1056/NEJMoa0706482  
52  
53  
54 13 Wallentin L, Becker RC, Budaj A, *et al.* Ticagrelor versus Clopidogrel in Patients  
55  
56 with Acute Coronary Syndromes. *N Engl J Med* 2009;**361**:1045–57.  
57  
58 doi:10.1056/NEJMoa0904327  
59  
60



- 1  
2  
3 14 Eisenstein EL, Anstrom KJ, Kong DF, *et al*. Clopidogrel Use and Long-term Clinical  
4  
5 Outcomes After Drug-Eluting Stent Implantation. *JAMA* 2007;**297**:159.  
6  
7 doi:10.1001/jama.297.2.joc60179  
8  
9
- 10 15 Bonaca MP, Bhatt DL, Cohen M, *et al*. Long-Term Use of Ticagrelor in Patients  
11  
12 with Prior Myocardial Infarction. *N Engl J Med* 2015;**372**:1791–800.  
13  
14 doi:10.1056/NEJMoa1500857  
15  
16
- 17 16 Mauri L, Kereiakes DJ, Yeh RW, *et al*. Twelve or 30 Months of Dual Antiplatelet  
18  
19 Therapy after Drug-Eluting Stents. *N Engl J Med* 2014;**371**:2155–66.  
20  
21 doi:10.1056/NEJMoa1409312  
22  
23
- 24 17 Levine GN, Bates ER, Bittl JA, *et al*. 2016 ACC/AHA Guideline Focused Update on  
25  
26 Duration of Dual Antiplatelet Therapy in Patients With Coronary Artery Disease:  
27  
28 A Report of the American College of Cardiology/American Heart Association  
29  
30 Task Force on Clinical Practice Guidelines. *J Am Coll Cardiol* 2016;**68**:1082–115.  
31  
32 doi:10.1016/j.jacc.2016.03.513  
33  
34
- 35 18 Tinetti ME, Bogardus ST, Agostini J V. Potential Pitfalls of Disease-Specific  
36  
37 Guidelines for Patients with Multiple Conditions. *N Engl J Med* 2004;**351**:2870–  
38  
39 4. doi:10.1056/NEJMsb042458  
40  
41  
42  
43
- 44 19 Kedhi E, Fabris E, van der Ent M, *et al*. Six months versus 12 months dual  
45  
46 antiplatelet therapy after drug-eluting stent implantation in ST-elevation  
47  
48 myocardial infarction (DAPT-STEMI): randomised, multicentre, non-inferiority  
49  
50 trial. *BMJ* 2018;**363**:k3793. doi:10.1136/bmj.k3793  
51  
52  
53
- 54 20 Hahn J-Y, Song Y Bin, Oh J-H, *et al*. 6-month versus 12-month or longer dual  
55  
56 antiplatelet therapy after percutaneous coronary intervention in patients with  
57  
58 acute coronary syndrome (SMART-DATE): a randomised, open-label, non-  
59  
60

- 1  
2  
3 inferiority trial. *Lancet* 2018;**391**:1274–84. doi:10.1016/S0140-6736(18)30493-8  
4  
5  
6 21 Bueno H, Pocock S, Danchin N, *et al.* International patterns of dual antiplatelet  
7  
8 therapy duration after acute coronary syndromes. *Heart* 2017;**103**:132–8.  
9  
10 doi:10.1136/heartjnl-2016-309509  
11  
12  
13 22 Flather MD, Babalis D, Booth J, *et al.* Cluster-randomized trial to evaluate the  
14  
15 effects of a quality improvement program on management of non–ST-elevation  
16  
17 acute coronary syndromes: The European Quality Improvement Programme for  
18  
19 Acute Coronary Syndromes (EQUIP-ACS). *Am Heart J* 2011;**162**:700–707.e1.  
20  
21  
22 doi:10.1016/j.ahj.2011.07.027  
23  
24  
25 23 Czarny MJ, Nathan AS, Yeh RW, *et al.* Adherence to Dual Antiplatelet Therapy  
26  
27 After Coronary Stenting: A Systematic Review. *Clin Cardiol* 2014;**37**:505–13.  
28  
29  
30 doi:10.1002/clc.22289  
31  
32  
33 24 Green A, Pottegård A, Broe A, *et al.* Initiation and persistence with dual  
34  
35 antiplatelet therapy after acute myocardial infarction: A Danish nationwide  
36  
37 population-based cohort study. *BMJ Open* 2016;**6**. doi:10.1136/bmjopen-2015-  
38  
39 010880  
40  
41  
42 25 Anastasius M, Lau JK, Hyun K, *et al.* The underutilisation of dual antiplatelet  
43  
44 therapy in acute coronary syndrome. *Int J Cardiol* 2017;**240**:30–6.  
45  
46  
47 doi:10.1016/j.ijcard.2017.04.077  
48  
49  
50 26 Prami T, Khanfir H, Deleskog A, *et al.* Clinical factors associated with initiation of  
51  
52 and persistence with ADP receptor-inhibiting oral antiplatelet treatment after  
53  
54 acute coronary syndrome: a nationwide cohort study from Finland. *BMJ Open*  
55  
56 2016;**6**:e012604. doi:10.1136/bmjopen-2016-012604  
57  
58  
59 27 Varenhorst C, Jensevik K, Jernberg T, *et al.* Duration of dual antiplatelet  
60

- 1  
2  
3 treatment with clopidogrel and aspirin in patients with acute coronary  
4  
5 syndrome. *Eur Heart J* 2014;**35**:969–78. doi:10.1093/eurheartj/eh438  
6  
7
- 8 28 Chung S-C, Sundström J, Gale CP, *et al*. Comparison of hospital variation in acute  
9  
10 myocardial infarction care and outcome between Sweden and United Kingdom:  
11  
12 population based cohort study using nationwide clinical registries. *Br Med J*  
13  
14 2015;**351**:h3913. doi:10.1136/BMJ.H3913  
15  
16
- 17 29 Eisenstein EL, Wojdyla D, Anstrom KJ, *et al*. Evaluating the impact of public  
18  
19 health notification: Duke clopidogrel experience. *Circ Cardiovasc Qual Outcomes*  
20  
21 2012;**5**:767–74. doi:10.1161/CIRCOUTCOMES.111.963330  
22  
23  
24
- 25 30 Cabana MD, Rand CS, Powe NR, *et al*. Why don't physicians follow clinical  
26  
27 practice guidelines? A framework for improvement. *JAMA* 1999;**282**:1458–  
28  
29 65.<http://www.ncbi.nlm.nih.gov/pubmed/10535437> (accessed 28 Nov 2017).  
30  
31
- 32 31 Ferreira-Gonzalez I, Marsal JR, Ribera A, *et al*. Background, Incidence, and  
33  
34 Predictors of Antiplatelet Therapy Discontinuation During the First Year After  
35  
36 Drug-Eluting Stent Implantation. *Circulation* 2010;**122**:1017–25.  
37  
38  
39  
40  
41  
42  
43  
44  
45  
46  
47  
48  
49  
50  
51  
52  
53  
54  
55  
56  
57  
58  
59  
60

1  
2  
3 **Figure legends**  
4  
5

6 Figure 1. Patients' flow chart  
7  
8

9  
10 Figure 2. Observed 12-months persistence rate by quarter and interrupted time series  
11  
12 model specification after setting a one year lag period for guidelines implementation  
13  
14

15 Figure 3. Predicted probabilities of 12-months persistence by (A) drug eluting stent, (B)  
16  
17 recommendation pattern and (C) center, over time.  
18  
19  
20  
21  
22  
23  
24  
25  
26  
27  
28  
29  
30  
31  
32  
33  
34  
35  
36  
37  
38  
39  
40  
41  
42  
43  
44  
45  
46  
47  
48  
49  
50  
51  
52  
53  
54  
55  
56  
57  
58  
59  
60

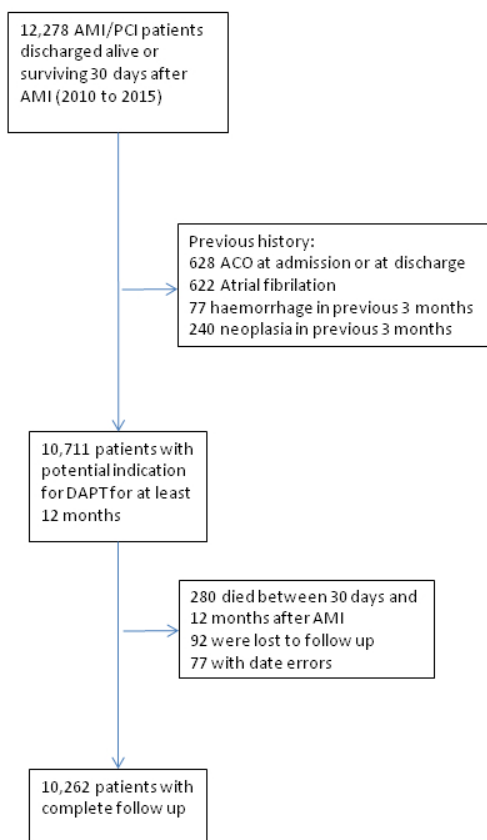

Figure 1. Patients flow

190x254mm (96 x 96 DPI)

1  
2  
3  
4  
5  
6  
7  
8  
9  
10  
11  
12  
13  
14  
15  
16  
17  
18  
19  
20  
21  
22  
23  
24  
25  
26  
27  
28  
29  
30  
31  
32  
33  
34  
35  
36  
37  
38  
39  
40  
41  
42  
43  
44  
45  
46  
47  
48  
49  
50  
51  
52  
53  
54  
55  
56  
57  
58  
59  
60

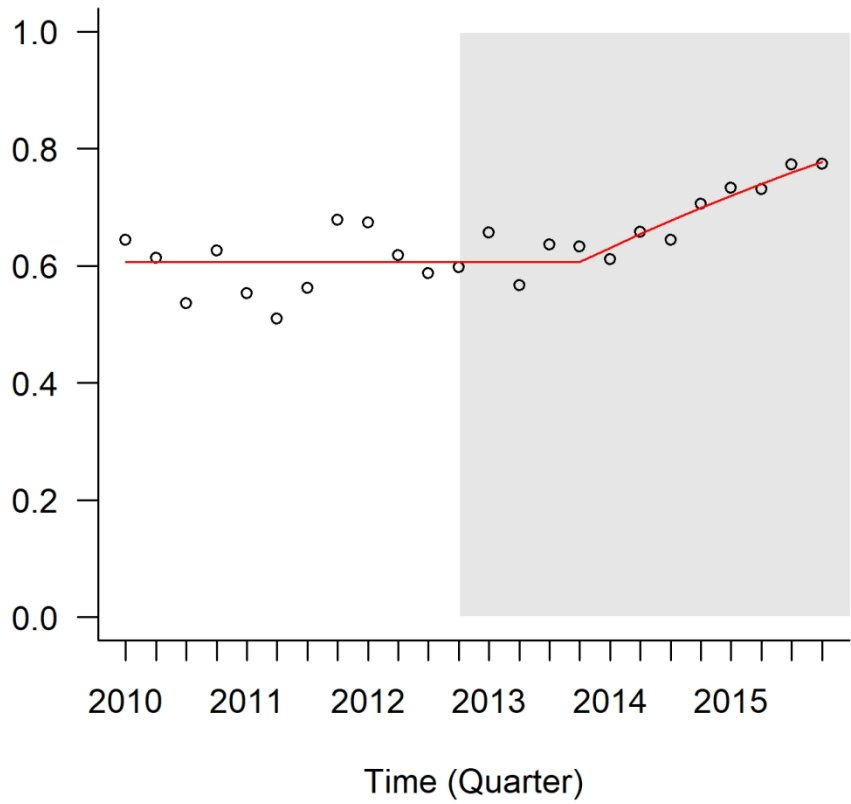

Figure 2. Observed 12-months persistence rate by quarter and interrupted time series model specification after setting a one year lag period for guidelines implementation

127x127mm (300 x 300 DPI)

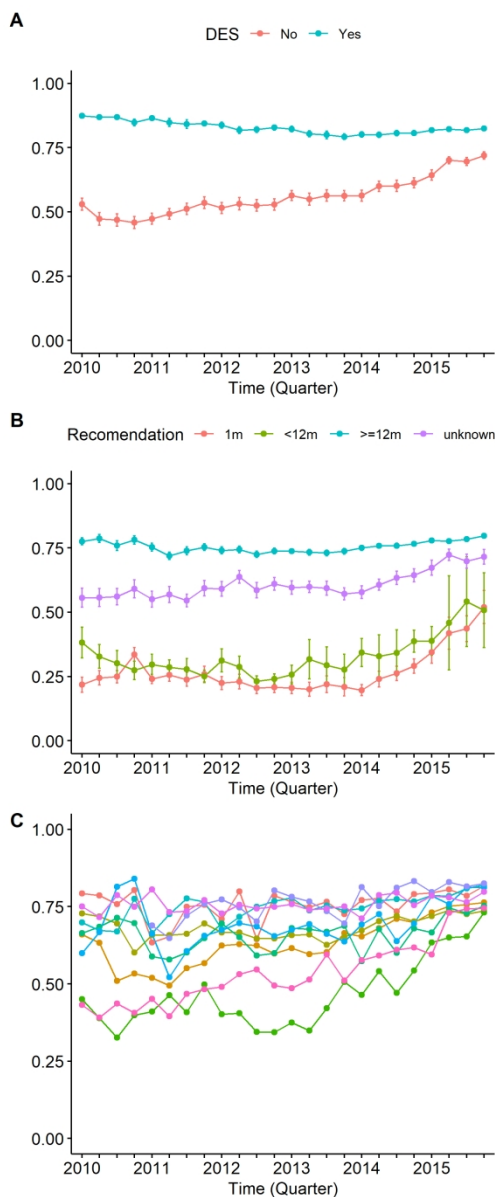

Figure 3. Predicted probabilities of 12-months persistence by (A) drug eluting stent, (B) recommendation pattern and (C) center, over time

127x304mm (300 x 300 DPI)

## Supplemental methods

### Data validation processes in the AMI Code registry

1. Automatic data validation processes to identify and feed-back missing data and incongruities.

2. Periodic data validation process every 3-6 months:

Since year 2011 this process was automated. The system automatically detects missing information in key variables and the identification of AMI codes that were activated by the emergency services (before admission) and were not included in the registry. Feed back for data validation is sent every 3-6 months for amendment or justification to the person responsible for data entry at each AMI Code Hospital.

Since year 2015 the automated process can be managed directly at any time by the person responsible for data entry in each hospital.

3. Specific studies:

In 2012 data were evaluated for **exhaustiveness**: all AMI cases consecutively admitted in 43 hospitals in Catalonia (10 AMI Code hospitals and 32 no AMI Code hospitals) during a 3 months period were registered and compared with the episodes registered in the AMI Code registry.

Between 88-92% of STEACS episodes were included in the AMI Code registry.

In 2013 concordance of the information between the AMI Code registry and the information from clinical records was assessed. 330 cases were analyzed and concordance was good for all key variables and there were no differences between hospitals.



1 **Supplemental tables**

2  
3  
4 Supplemental table 1. ICD9 codes used for the identification of conditions and diseases present at index  
5  
6 admission and for the identification of events during follow up.  
7  
8

9

| Disease or condition                  | ICD9 diagnostic or procedure code                                                                                                                                                                                                                     |
|---------------------------------------|-------------------------------------------------------------------------------------------------------------------------------------------------------------------------------------------------------------------------------------------------------|
| Heart failure                         | 428.0, 428.1, 428.22, 428.23, 428.3, 428.32, 428.33, 428.41, 428.43                                                                                                                                                                                   |
| Renal disease                         | 585*                                                                                                                                                                                                                                                  |
| Neoplasia                             | 140-239                                                                                                                                                                                                                                               |
| Anemia                                | 280-285                                                                                                                                                                                                                                               |
| Chronic obstructive pulmonary disease | 491-492, 494*, 496*                                                                                                                                                                                                                                   |
| Peripheral arterial disease           | 440.2, 440.3, 440.4                                                                                                                                                                                                                                   |
| Atrial fibrillation                   | 427.3*                                                                                                                                                                                                                                                |
| <b>Events during follow up</b>        |                                                                                                                                                                                                                                                       |
| Acute myocardial infarction           | 410*, except: 410.*2                                                                                                                                                                                                                                  |
| Ischemic stroke                       | 433*, 434*, except: 433.*0, 434.*0                                                                                                                                                                                                                    |
| Haemorrhagic stroke                   | 430*, 431*, 432*                                                                                                                                                                                                                                      |
| Intraocular bleeding                  | 362.81, 363.6, 363.61, 363.62, 376.32, 377.42, 379.23                                                                                                                                                                                                 |
| Digestive bleeding                    | 530.21, 530.7, 530.82, 531.0, 531.2, 531.4, 531.6, 532.0, 532.2, 532.4, 532.6, 533.0, 533.2, 533.4, 534.4, 534.6, 535.01, 535.11, 535.21, 535.31, 535.41, 535.51, 535.61, 535.71, 537.83, 562.02, 562.03, 562.12, 562.13, 569.3, 569.85, 578.1, 578.9 |
| Other bleeding                        | 246.3, 459.0, 602.1, 784.8, 596.7, 599.7, 852*, 997.02, 998.1,                                                                                                                                                                                        |
| Endoscopic treatment                  | 444.3, 454.2, 454.3                                                                                                                                                                                                                                   |
| Transfusion                           | 990.4                                                                                                                                                                                                                                                 |

10  
11  
12  
13  
14  
15  
16  
17  
18  
19  
20  
21  
22  
23  
24  
25  
26  
27  
28  
29  
30  
31  
32  
33  
34  
35  
36  
37  
38  
39  
40  
41  
42  
43  
44  
45  
46  
47  
48  
49  
50  
51  
52  
53  
54  
55  
56  
57  
58  
59  
60

Supplemental table 2. ATC codes used for the identification of drug treatment

| <b>Drug treatment</b> | <b>ATC code</b>           |
|-----------------------|---------------------------|
| ASA                   | B01AC06, N02BA01, B01AC30 |
| Ticlopidine           | B01AC05                   |
| Clopidogrel           | B01AC04                   |
| Prasugrel             | B01AC22                   |
| Ticagrelor            | B01AC24                   |
| Dabigatran etexilate  | B01AE07                   |
| Rivaroxaban           | B01AF01                   |
| Apixaban              | B01AF02                   |
| Beta-blocker          | C07                       |
| ACE inhibitor         | C09                       |
| Statins               | C10AA                     |

Supplemental table 3. Factors associated with a persistence of at least 12 months as assessed with interrupted time series logistic regression model. Results of sensitivity analyses.

| Fixed Effects                                                                                      | Original Model |              |         | Discharged home |              |         | Non-ischemic or haemorrhagic events |              |         |
|----------------------------------------------------------------------------------------------------|----------------|--------------|---------|-----------------|--------------|---------|-------------------------------------|--------------|---------|
|                                                                                                    | OR             | CI95%        | P value | OR              | CI95%        | P value | OR                                  | CI95%        | P value |
| Drugeluting stent                                                                                  | 2.02           | 1.61 - 2.53  | <0.001  | 1.93            | 1.46 - 2.54  | <0.001  | 2.045                               | 1.66 - 2.53  | <0.001  |
| Number of Stents                                                                                   | 1.21           | 1.12 - 1.31  | <0.001  | 1.31            | 1.18 - 1.44  | <0.001  | 1.231                               | 1.14 - 1.33  | <0.001  |
| Recommendation at PCI hospital discharge (Ref. 1 month)                                            |                |              |         |                 |              |         |                                     |              |         |
| <12 months                                                                                         | 1.67           | 0.88 - 3.17  | 0.120   | 3.26            | 1.71 - 6.2   | <0.001  | 2.016                               | 0.96 - 4.26  | 0.066   |
| ≥12 months                                                                                         | 5.92           | 3.34 - 10.52 | <0.001  | 6.97            | 3.97 - 12.26 | <0.001  | 7.443                               | 4.19 - 13.23 | <0.001  |
| unknown                                                                                            | 2.23           | 0.82 - 6.02  | 0.115   | 2.50            | 0.88 - 7.08  | 0.086   | 2.594                               | 0.93 - 7.25  | 0.069   |
| Hyperlipidemia                                                                                     | 1.19           | 1.08 - 1.31  | <0.001  | 1.14            | 1 - 1.3      | 0.045   | 1.222                               | 1.11 - 1.35  | <0.001  |
| Previous by-pass surgery                                                                           | 1.81           | 1.06 - 3.07  | 0.029   | 2.69            | 1.3 - 5.58   | 0.008   | 1.838                               | 1.01 - 3.34  | 0.045   |
| Two or more treated vessels                                                                        | 1.20           | 1.09 - 1.32  | <0.001  | 1.18            | 1.04 - 1.34  | 0.012   | 1.116                               | 1.01 - 1.24  | 0.033   |
| Drugeluting stents * Time (quarter)                                                                | 0.97           | 0.95 - 0.98  | <0.001  | 0.96            | 0.94 - 0.98  | <0.001  | 0.963                               | 0.95 - 0.98  | <0.001  |
| Guidelines implementation                                                                          | 1.20           | 1.11 - 1.3   | <0.001  | 1.24            | 1.12 - 1.36  | <0.001  | 1.238                               | 1.14 - 1.35  | <0.001  |
| Recommendation at PCI hospital discharge (Ref. 1 month) * Time (quarter)*Guidelines implementation |                |              |         |                 |              |         |                                     |              |         |
| <12 months                                                                                         | 0.91           | 0.8 - 1.05   | 0.191   | 0.87            | 0.73 - 1.03  | 0.097   | 0.904                               | 0.79 - 1.04  | 0.160   |
| ≥12 months                                                                                         | 0.87           | 0.8 - 0.94   | 0.001   | 0.85            | 0.76 - 0.94  | 0.002   | 0.845                               | 0.77 - 0.92  | <0.001  |
| unknown                                                                                            | 0.89           | 0.82 - 0.98  | 0.013   | 0.86            | 0.77 - 0.97  | 0.012   | 0.865                               | 0.79 - 0.95  | 0.003   |
| <b>Random Effects</b>                                                                              | <b>Var.</b>    | <b>SD</b>    |         | <b>Var.</b>     | <b>SD</b>    |         | <b>Var.</b>                         | <b>SD</b>    |         |
| Random - Intercept                                                                                 | 0.46           | 0.68         |         | 0.62            | 0.78         |         | 0.40                                | 0.63         |         |
| Random - Slopes                                                                                    |                |              |         |                 |              |         |                                     |              |         |
| Recommendation at PCI hospital discharge (Ref. 1 month)                                            | 0.38           | 0.62         |         | 0.11            | 0.33         |         | 0.66                                | 0.81         |         |
| <12 months                                                                                         | 0.39           | 0.62         |         | 0.39            | 0.63         |         | 0.40                                | 0.63         |         |
| ≥12 months                                                                                         | 2.00           | 1.41         |         | 2.16            | 1.47         |         | 2.12                                | 1.46         |         |
| Drugeluting stent                                                                                  | 0.09           | 0.30         |         | 0.13            | 0.35         |         | 0.07                                | 0.27         |         |
| <b>ICC</b>                                                                                         | <b>0.087</b>   |              |         | <b>0.099</b>    |              |         | <b>0.100</b>                        |              |         |

Supplemental figure 1. Persistence with DAPT from discharge to 12 months by year of episode.

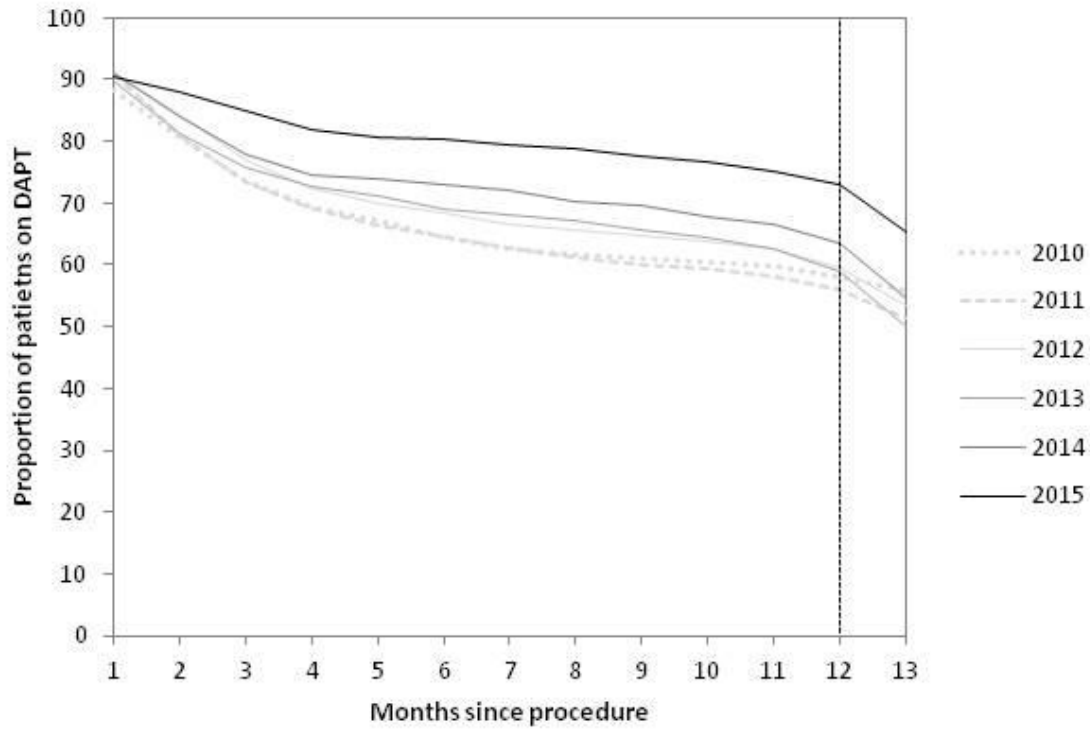

Supplemental figure 2. DAPT duration recommended in each hospital by year of episode

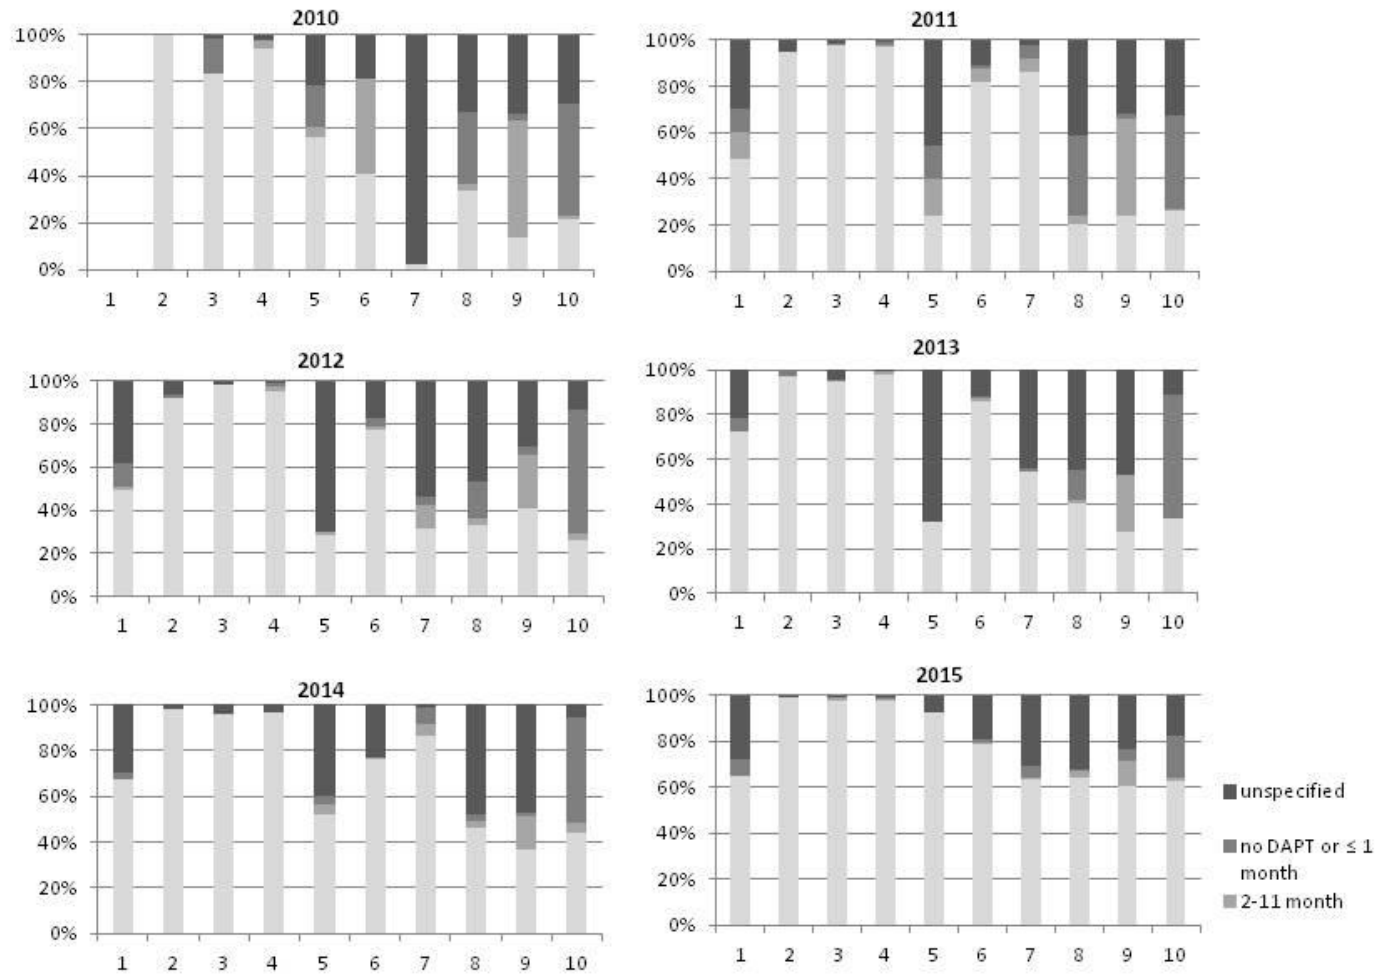

STROBE Statement—Checklist of items that should be included in reports of *cohort studies*

|                              | Item No | Recommendation                                                                                                                                                                                                                                                                                                         | Page num                              |
|------------------------------|---------|------------------------------------------------------------------------------------------------------------------------------------------------------------------------------------------------------------------------------------------------------------------------------------------------------------------------|---------------------------------------|
| <b>Title and abstract</b>    | 1       | (a) Indicate the study's design with a commonly used term in the title or the abstract                                                                                                                                                                                                                                 | 3<br>(Design)                         |
|                              |         | (b) Provide in the abstract an informative and balanced summary of what was done and what was found                                                                                                                                                                                                                    | 3                                     |
| <b>Introduction</b>          |         |                                                                                                                                                                                                                                                                                                                        |                                       |
| Background/rationale         | 2       | Explain the scientific background and rationale for the investigation being reported                                                                                                                                                                                                                                   | 6                                     |
| Objectives                   | 3       | State specific objectives, including any prespecified hypotheses                                                                                                                                                                                                                                                       | 7                                     |
| <b>Methods</b>               |         |                                                                                                                                                                                                                                                                                                                        |                                       |
| Study design                 | 4       | Present key elements of study design early in the paper                                                                                                                                                                                                                                                                | 7-8                                   |
| Setting                      | 5       | Describe the setting, locations, and relevant dates, including periods of recruitment, exposure, follow-up, and data collection                                                                                                                                                                                        | 7-8                                   |
| Participants                 | 6       | (a) Give the eligibility criteria, and the sources and methods of selection of participants. Describe methods of follow-up<br>(b) For matched studies, give matching criteria and number of exposed and unexposed                                                                                                      | 7-8                                   |
| Variables                    | 7       | Clearly define all outcomes, exposures, predictors, potential confounders, and effect modifiers. Give diagnostic criteria, if applicable                                                                                                                                                                               | 7-8                                   |
| Data sources/<br>measurement | 8*      | For each variable of interest, give sources of data and details of methods of assessment (measurement). Describe comparability of assessment methods if there is more than one group                                                                                                                                   | 7-8                                   |
| Bias                         | 9       | Describe any efforts to address potential sources of bias                                                                                                                                                                                                                                                              | 10-11                                 |
| Study size                   | 10      | Explain how the study size was arrived at                                                                                                                                                                                                                                                                              | 9                                     |
| Quantitative variables       | 11      | Explain how quantitative variables were handled in the analyses. If applicable, describe which groupings were chosen and why                                                                                                                                                                                           | 9                                     |
| Statistical methods          | 12      | (a) Describe all statistical methods, including those used to control for confounding<br>(b) Describe any methods used to examine subgroups and interactions<br>(c) Explain how missing data were addressed<br>(d) If applicable, explain how loss to follow-up was addressed<br>(e) Describe any sensitivity analyses | 10-11<br>10-11<br>13<br>13<br>12      |
| <b>Results</b>               |         |                                                                                                                                                                                                                                                                                                                        |                                       |
| Participants                 | 13*     | (a) Report numbers of individuals at each stage of study—eg numbers potentially eligible, examined for eligibility, confirmed eligible, included in the study, completing follow-up, and analysed<br>(b) Give reasons for non-participation at each stage<br>(c) Consider use of a flow diagram                        | 12<br>12<br>Fig 1                     |
| Descriptive data             | 14*     | (a) Give characteristics of study participants (eg demographic, clinical, social) and information on exposures and potential confounders<br>(b) Indicate number of participants with missing data for each variable of interest<br>(c) Summarise follow-up time (eg, average and total amount)                         | Tables 1,<br>2<br>Tables 1,<br>2<br>8 |
| Outcome data                 | 15*     | Report numbers of outcome events or summary measures over time                                                                                                                                                                                                                                                         | Fig 1                                 |

|                          |    |                                                                                                                                                                                                              |                  |
|--------------------------|----|--------------------------------------------------------------------------------------------------------------------------------------------------------------------------------------------------------------|------------------|
|                          |    |                                                                                                                                                                                                              | suppl            |
| Main results             | 16 | (a) Give unadjusted estimates and, if applicable, confounder-adjusted estimates and their precision (eg, 95% confidence interval). Make clear which confounders were adjusted for and why they were included | Table 3          |
|                          |    | (b) Report category boundaries when continuous variables were categorized                                                                                                                                    | Table 3          |
|                          |    | (c) If relevant, consider translating estimates of relative risk into absolute risk for a meaningful time period                                                                                             |                  |
| Other analyses           | 17 | Report other analyses done—eg analyses of subgroups and interactions, and sensitivity analyses                                                                                                               | Table 3<br>suppl |
| <b>Discussion</b>        |    |                                                                                                                                                                                                              |                  |
| Key results              | 18 | Summarise key results with reference to study objectives                                                                                                                                                     | 15               |
| Limitations              | 19 | Discuss limitations of the study, taking into account sources of potential bias or imprecision. Discuss both direction and magnitude of any potential bias                                                   | 19-20            |
| Interpretation           | 20 | Give a cautious overall interpretation of results considering objectives, limitations, multiplicity of analyses, results from similar studies, and other relevant evidence                                   | 19-20            |
| Generalisability         | 21 | Discuss the generalisability (external validity) of the study results                                                                                                                                        | 20               |
| <b>Other information</b> |    |                                                                                                                                                                                                              |                  |
| Funding                  | 22 | Give the source of funding and the role of the funders for the present study and, if applicable, for the original study on which the present article is based                                                | 5                |

\*Give information separately for exposed and unexposed groups.

**Note:** An Explanation and Elaboration article discusses each checklist item and gives methodological background and published examples of transparent reporting. The STROBE checklist is best used in conjunction with this article (freely available on the Web sites of PLoS Medicine at <http://www.plosmedicine.org/>, Annals of Internal Medicine at <http://www.annals.org/>, and Epidemiology at <http://www.epidem.com/>). Information on the STROBE Initiative is available at <http://www.strobe-statement.org>.

# BMJ Open

## Persistence with dual antiplatelet therapy after percutaneous coronary intervention for ST-Segment-Elevation Acute Coronary Syndrome. A population-based cohort study in Catalonia (Spain)

|                                 |                                                                                                                                                                                                                                                                                                                                                                                                                                                                                                                                                                                                                                                                                                                                                                                                                                                                                                                                                                                                                                                                                                                                                                                                                                                                                                                                                                                                                                                                                                                                    |
|---------------------------------|------------------------------------------------------------------------------------------------------------------------------------------------------------------------------------------------------------------------------------------------------------------------------------------------------------------------------------------------------------------------------------------------------------------------------------------------------------------------------------------------------------------------------------------------------------------------------------------------------------------------------------------------------------------------------------------------------------------------------------------------------------------------------------------------------------------------------------------------------------------------------------------------------------------------------------------------------------------------------------------------------------------------------------------------------------------------------------------------------------------------------------------------------------------------------------------------------------------------------------------------------------------------------------------------------------------------------------------------------------------------------------------------------------------------------------------------------------------------------------------------------------------------------------|
| Journal:                        | <i>BMJ Open</i>                                                                                                                                                                                                                                                                                                                                                                                                                                                                                                                                                                                                                                                                                                                                                                                                                                                                                                                                                                                                                                                                                                                                                                                                                                                                                                                                                                                                                                                                                                                    |
| Manuscript ID                   | bmjopen-2018-028114.R2                                                                                                                                                                                                                                                                                                                                                                                                                                                                                                                                                                                                                                                                                                                                                                                                                                                                                                                                                                                                                                                                                                                                                                                                                                                                                                                                                                                                                                                                                                             |
| Article Type:                   | Research                                                                                                                                                                                                                                                                                                                                                                                                                                                                                                                                                                                                                                                                                                                                                                                                                                                                                                                                                                                                                                                                                                                                                                                                                                                                                                                                                                                                                                                                                                                           |
| Date Submitted by the Author:   | 19-Jun-2019                                                                                                                                                                                                                                                                                                                                                                                                                                                                                                                                                                                                                                                                                                                                                                                                                                                                                                                                                                                                                                                                                                                                                                                                                                                                                                                                                                                                                                                                                                                        |
| Complete List of Authors:       | Ribera, Aida; University Hospital Vall d'Hebron, Cardiology<br>Ferreira-Gonzalez, Ignacio; University Hospital Vall d'Hebron, Cardiology<br>Marsal, Josep Ramon; University Hospital Vall d'Hebron, Cardiology<br>Oristrell, Gerard; University Hospital Vall d'Hebron, Cardiology<br>Faixedas, Maria Teresa; Servei Català de la Salut, Catalonia, Spain<br>Rosas, Alba; 4. Departament de Salut, Generalitat de Catalunya<br>Tizón-Marcos, Helena; 5. Cardiology Department, Hospital del Mar, and<br>Heart Diseases Biomedical Research Group and IMIM (Hospital del Mar<br>Medical Research Institute), and Faculty of Medicine, Universitat<br>Autonoma de Barcelona<br>Rojas, Sergio; 6. Cardiology Department, Hospital Universitari de<br>Tarragona Joan XXIII, IISPV, and Universidad Rovira Virgili<br>Labata, Carlos; Cardiology Department, Hospital German Tries i Pujol<br>Cardenas, Merida; Cardiology Department, Hospital Josep Trueta<br>Homs, Silvia; Cardiology Department, Hospital Mútua de Terrassa<br>Tomas-Querol, Carlos; Cardiology Department, Hospital Arnau de<br>Villanova<br>Garcia-Picart, Joan; 11. Cardiology Department, Hospital de la Santa<br>Creu i Sant Pau<br>Gomez-Hospital, Joan; Cardiology Department, Hospital de Bellvitge<br>Pijoan, Jose; BioCruces Health Research Institute<br>Masotti, Monica; Cardiology Department, Hospital Clínic<br>Mauri, Josepa; Departament de Salut, Generalitat de Catalunya<br>Garcia Dorado, David; University Hospital Vall d'Hebron, Cardiology |
| <b>Primary Subject Heading</b>: | Cardiovascular medicine                                                                                                                                                                                                                                                                                                                                                                                                                                                                                                                                                                                                                                                                                                                                                                                                                                                                                                                                                                                                                                                                                                                                                                                                                                                                                                                                                                                                                                                                                                            |
| Secondary Subject Heading:      | Health services research                                                                                                                                                                                                                                                                                                                                                                                                                                                                                                                                                                                                                                                                                                                                                                                                                                                                                                                                                                                                                                                                                                                                                                                                                                                                                                                                                                                                                                                                                                           |
| Keywords:                       | dual antiplatelet therapy, ST-elevation myocardial infarction, persistence with treatment, percutaneous coronary intervention                                                                                                                                                                                                                                                                                                                                                                                                                                                                                                                                                                                                                                                                                                                                                                                                                                                                                                                                                                                                                                                                                                                                                                                                                                                                                                                                                                                                      |
|                                 |                                                                                                                                                                                                                                                                                                                                                                                                                                                                                                                                                                                                                                                                                                                                                                                                                                                                                                                                                                                                                                                                                                                                                                                                                                                                                                                                                                                                                                                                                                                                    |



1  
2  
3  
4  
5  
6  
7  
8  
9  
10  
11  
12  
13  
14  
15  
16  
17  
18  
19  
20  
21  
22  
23  
24  
25  
26  
27  
28  
29  
30  
31  
32  
33  
34  
35  
36  
37  
38  
39  
40  
41  
42  
43  
44  
45  
46  
47  
48  
49  
50  
51  
52  
53  
54  
55  
56  
57  
58  
59  
60



1  
2  
3 **Persistence with dual antiplatelet therapy after percutaneous coronary intervention**  
4 **for ST-Segment-Elevation Acute Coronary Syndrome. A population-based cohort**  
5 **study in Catalonia (Spain)**  
6  
7  
8  
9

10  
11 Aida Ribera<sup>1,2</sup>, PhD; Ignacio Ferreira-González<sup>1,2</sup>, MD PhD; Josep Ramon Marsal<sup>1,2</sup>, PhD;  
12  
13 Gerard Oristrell<sup>1,2</sup>, MD Maria Teresa Faixedas<sup>3</sup>, MD; Alba Rosas<sup>4</sup>, PhD; Helena Tizón-  
14  
15 Marcos<sup>5</sup>, MD; Sergio Rojas<sup>6</sup>, MD; Carlos Labata<sup>7</sup>, MD; Mérida Cárdenas<sup>8</sup>, MD; Silvia  
16  
17 Homs<sup>9</sup>, MD; Carlos Tomás-Querol<sup>10</sup>, MD; Joan Garcia-Picart<sup>11</sup>, MD; Joan A. Gomez-  
18  
19 Hospital<sup>12</sup>, MD, PhD; Jose Ignacio Pijoan<sup>2,13</sup>, MD PhD; Monica Masotti<sup>14</sup>, MD; Josepa  
20  
21 Mauri<sup>4,7</sup>, MD PhD; David García-Dorado<sup>1</sup>, MD PhD  
22  
23  
24  
25

26 On behalf of the VESA Study and Codi IAM Investigators

- 27  
28 1. Cardiology Department, Vall d'Hebrón Hospital, Vall d'Hebron Research  
29  
30 Institute (VHIR) and Universitat Autònoma de Barcelona. Barcelona, Spain  
31  
32 2. CIBER de Epidemiología y Salud Pública (CIBERESP). Spain  
33  
34 3. Servei Català de la Salut, Catalonia, Spain  
35  
36 4. Departament de Salut, Generalitat de Catalunya, Catalonia, Spain.  
37  
38 5. Cardiology Department, Hospital del Mar, and Heart Diseases Biomedical  
39  
40 Research Group and IMIM (Hospital del Mar Medical Research Institute), and  
41  
42 Faculty of Medicine, Universitat Autònoma de Barcelona. Spain  
43  
44 6. Cardiology Department, Hospital Universitari de Tarragona Joan XXIII, IISPV,  
45  
46 and Universidad Rovira Virgili. Tarragona. Spain.  
47  
48 7. Cardiology Department, Hospital German Tries i Pujol. Barcelona. Spain.  
49  
50 8. Cardiology Department, Hospital Josep Trueta. Girona. Spain.  
51  
52 9. Cardiology Department, Hospital Mútua de Terrassa. Bcelona. Spain.  
53  
54 10. Cardiology Department, Hospital Arnau de Villanova. Lleida. Spain.  
55  
56  
57  
58  
59  
60

1  
2  
3 11. Cardiology Department, Hospital de la Santa Creu i Sant Pau. Barcelona. Spain.  
4

5 12. Cardiology Department, Hospital de Bellvitge. Barcelona. Spain  
6

7  
8 13. Clinical Epidemiology Unit, Hospital Universitario Cruces/BioCruces Health  
9  
10 Research Insitute, Bilbao. Spain  
11

12  
13 14. Cardiology Department, Hospital Clínic, Barcelona. Spain.  
14  
15  
16  
17

18  
19 **Corresponding author**

20  
21  
22 Ignacio Ferreira-González. Cardiovascular Epidemiology Unit. Cardiology Department.  
23

24 University Hospital Vall d'Hebron. Psg. Vall d'Hebron, 119-129 08035 Barcelona. Spain  
25

26  
27 [nachoferreira@secardiologia.es](mailto:nachoferreira@secardiologia.es)  
28

29 tel. 932746177  
30  
31  
32  
33

34 **Word count:** 4013  
35

36 **Keywords:** dual antiplatelet therapy, persistence with treatment, ST-elevation  
37  
38 myocardial infarction, percutaneous coronary intervention  
39  
40  
41  
42  
43  
44  
45  
46  
47  
48  
49  
50  
51  
52  
53  
54  
55  
56  
57  
58  
59  
60

## ABSTRACT

**Objectives:** Guidelines recommending 12 months dual antiplatelet therapy (DAPT) in patients with ST-elevation acute coronary syndrome (STEACS) undergoing percutaneous coronary intervention (PCI) were published in year 2012. We aimed to describe the influence of guideline implementation on the trend in 12-month persistence with DAPT between 2010 and 2015 and to evaluate its relationship with DAPT duration regimens recommended at discharge from PCI hospitals.

**Design:** Observational study based on region-wide registry data linked to pharmacy billing data for DAPT follow up.

**Setting.** All PCI hospitals (10) belonging to the AMI-Code network in Catalonia (Spain)

**Participants:** 10,711 STEACS patients undergoing PCI between 2010 and 2015 were followed up.

**Primary and secondary outcome measures:** Primary outcome was 12 month persistence with DAPT. Calendar year quarter, publication of guidelines; DAPT duration regimen recommended in the hospital discharge report, baseline patient characteristics and significant interactions were included in mixed effects logistic regression based interrupted time-series models. **Results:** The proportion of patients on-DAPT at 12 months increased from 58% (56-60) in 2010 to 73% (71-75) in 2015. The rate of 12-months persistence with DAPT significantly increased after the publication of clinical guidelines with a time lag of one year (OR=1.20; 95% CI: 1.11-1.30). A higher risk profile, more extensive and complex coronary disease, use of drug-eluting stents (OR=1.90; 95% CI: 1.50-2.40) and a 12-months DAPT regimen recommendation at discharge from the PCI hospital (OR=5.76; 95% CI: 3.26-10.2) were associated with 12-months persistence.

1  
2  
3 **Conclusion:** Persistence with 12-month DAPT has increased since publication of clinical  
4  
5 guidelines. Even though most patients were discharged on DAPT, only 73% with  
6  
7 potential indication were on-DAPT 12 months after PCI. A guideline-based  
8  
9 recommendation at PCI hospital discharge was highly associated with full persistence  
10  
11 with DAPT. Establishing evidence-based, common prescribing criteria across hospitals  
12  
13 in the AMI-network would favour adherence and reduce variability.  
14  
15  
16  
17  
18  
19  
20

### 21 **Strengths and limitations of this study**

- 22
- 23 • The study describes the trends in persistence with DAPT during 2010-2015 in a
- 24 region-wide comprehensive cohort of patients using administrative data linked
- 25 to a clinical registry
- 26
- 27
- 28
- 29
- 30
- 31 • It also evaluates the impact of the DAPT duration recommended at the PCI
- 32 hospital discharge on 12-months persistence
- 33
- 34
- 35
- 36 • Limitations of using observational registry data include the possibility of coding
- 37 errors and the inability to accurately identify specific contraindications for
- 38 treatment or other patient characteristics that might be relevant for the study
- 39 aims
- 40
- 41
- 42
- 43
- 44
- 45
- 46 • The use of pharmacy refill data as a proxy of patients' adherence and
- 47 persistence has also limitations which have been extensively described
- 48
- 49
- 50
- 51
- 52
- 53

### 54 **Study funding**

55  
56  
57  
58  
59  
60

1  
2  
3 The study was supported by Instituto de Salud Carlos III grand number PI13/00399 and  
4  
5 the Fundació la Marató de TV3 grand number 430/U/2015. The funders did not have  
6  
7 any role in the study design and development.  
8  
9

### 10 11 **Competing interest statement** 12

13  
14 All authors have completed the ICMJE uniform disclosure form at  
15  
16 [http://www.icmje.org/coi\\_disclosure.pdf](http://www.icmje.org/coi_disclosure.pdf) and declare: no support from any  
17  
18 organisation for the submitted work; no financial relationships with any organisations  
19  
20 that might have an interest in the submitted work in the previous three years, no other  
21  
22 relationships or activities that could appear to have influenced the submitted work  
23  
24  
25  
26  
27  
28  
29  
30  
31  
32  
33  
34  
35  
36  
37  
38  
39  
40  
41  
42  
43  
44  
45  
46  
47  
48  
49  
50  
51  
52  
53  
54  
55  
56  
57  
58  
59  
60

## Introduction

The need of dual antiplatelet therapy (DAPT) combining aspirin and an ADP-receptor blocker for at least 12 months in patients with ST-elevation acute coronary syndrome (STEACS) undergoing percutaneous coronary intervention (PCI) is well established and was incorporated into clinical guidelines in 2012[1,2].

Adherence of patients to this strategy is crucial to ensure its efficacy. Adherence to medication is usually defined[3] as the extent to which patients take medications as prescribed by their health care providers and persistence is defined as time from initiation to discontinuation of a therapy. Patients' persistence with DAPT may be influenced by several factors but will depend strongly on whether they ultimately receive a correct prescription from their physicians in the primary care setting. Patients may receive recommendations from various health providers at different stages of their process of care, from the interventionist cardiologist to their primary physician. It could be hypothesized that the last would tend to rely on the recommendation of the more specialized health professional. Thus, one potential determinant of patients' persistence with DAPT for at least 12 months is the instructions provided in the discharge report of the hospital where the patient was attended during the acute phase.

In Catalonia, an autonomous region of Spain, the acute care of STEACS is organized through a region-wide network, the Acute Myocardial Infarction (AMI) Code, to derive patients with suspected STEACS to one of the 10 reference hospitals with PCI

1  
2  
3 capability. Performance of the AMI Code is prospectively and exhaustively  
4 registered[4,5], providing an appropriate tool for quality evaluation. The Catalan  
5 Health Information System systematically registers, among other, data on pharmacy  
6 refills. Pharmacy billing data, although indirect, is an accepted method for evaluating  
7 persistence with treatment in large patient cohorts[3,6].  
8  
9  
10  
11  
12  
13  
14  
15  
16  
17

18 The aims of the present study were: first, to describe persistence with DAPT for at least  
19 12 months in patients with STEACS undergoing PCI from 2010 to 2015; second, to  
20 evaluate the influence guidelines recommendation for a 12-months DAPT schedule on  
21 the rate of 12-months persistence along time; and third, to evaluate the association of  
22 the DAPT duration recommended at the PCI hospital discharge with patients'  
23 persistence with treatment for at least 12 months.  
24  
25  
26  
27  
28  
29  
30  
31  
32  
33  
34

## 35 **Methods**

### 36 ***Data sources***

37  
38  
39  
40  
41 Data were obtained through the Public Data Analysis for Health Research and  
42 Innovation Program (PADRIS). The PADRIS allows access to information from different  
43 sources on public healthcare resources usage for the population of Catalonia linked at  
44 the patient level with warranted accomplishment of ethical principles. Specifically, for  
45 the present study we linked data of the pharmacy billing registry with the AMI Code  
46 Registry. The AMI Code registry was launched in 2010 to evaluate performance of the  
47 AMI Code [4,5]. Exhaustiveness and quality of data is assessed periodically (see  
48 supplemental methods for details). The database belongs to the Catalan Department  
49  
50  
51  
52  
53  
54  
55  
56  
57  
58  
59  
60



1  
2  
3 of Health and includes demographic, clinical, and therapeutic data for each episode of  
4  
5 hospitalization for STEACS. It conforms to the ethical and legal requirements for  
6  
7 research purposes. The study obtained ethics approval from the Vall d'Hebron Clinical  
8  
9 Research Ethics Committee (EPA(AG)7/2014(3989)).  
10  
11  
12  
13  
14

15 The registry was completed for the purpose of the present analysis with retrospective  
16  
17 collection of additional specific data: diseased vessels, responsible vessel, stent type,  
18  
19 number of stents. The recommendation of antithrombotic drugs was also collected *ad*  
20  
21 *hoc* for the study from the discharge report. The recommendation of DAPT was  
22  
23 defined as the recommendation of Acetylsalicylic acid (ASA) and clopidogrel, prasugrel  
24  
25 or ticagrelor for specified periods. If the recommended duration of DAPT was not  
26  
27 specified, the discharge recommendation pattern was classified as "unspecified". A  
28  
29 local investigator at each center performed the specific retrospective data collection.  
30  
31  
32  
33

34 History of major haemorrhage, neoplasia, renal disease, heart failure, peripheral  
35  
36 arterial disease and atrial fibrillation, were obtained from minimum basic data set  
37  
38 (MBDS) diagnoses coded in hospitalization episodes occurring in the previous three  
39  
40 months before index hospitalization. Major haemorrhage was defined as: a diagnosis  
41  
42 of digestive bleeding in any diagnostic position (primary or secondary) together with a  
43  
44 procedure code for endoscopic treatment or for transfusion of blood products, or a  
45  
46 diagnosis of haemorrhagic stroke, or a diagnosis of intraocular haemorrhage, or a  
47  
48 diagnosis of other types of haemorrhage together with a procedure code for  
49  
50 transfusion of blood products. Major ischemic events (AMI or stroke) and major  
51  
52 haemorrhage during the 12 months following the index episode were obtained in the  
53  
54  
55  
56  
57  
58  
59  
60

1  
2  
3 same way. Mortality during the 12 months following the index episode was obtained  
4  
5 from the insured registry status.  
6  
7

8  
9 Drug treatment during the 12-month post-discharge follow up was obtained from the  
10  
11 pharmacy billing registry. ICD9 and ATC codes used for the identification of study  
12  
13 variables are listed in the supplemental tables 1 and 2.  
14  
15  
16

### 17 18 19 20 ***Data Availability Statement*** 21

22  
23 Additional data is not available due to ethical requirements of the PADRIS Program  
24  
25  
26  
27  
28

### 29 30 ***Study population*** 31

32 We included all consecutive patients who survived a STEACS between January 2010  
33  
34 and December 2015, received primary or post fibrinolysis PCI in one of the 10  
35  
36 reference hospitals of the AMI Code network, were discharged home or transferred to  
37  
38 another hospital and survived at least one month after AMI. New episodes of STACS  
39  
40 occurring to the same patients during the study period were only accounted as follow  
41  
42 up events. Patients with likely contraindication for DAPT (history of major bleeding or  
43  
44 neoplasm in the three months prior to the index episode and patients requiring  
45  
46 anticoagulation) were excluded.  
47  
48  
49  
50  
51  
52

### 53 54 ***Persistence with treatment*** 55

56 DAPT was defined as the concomitant use of ASA and a P2Y<sub>12</sub> antagonist. Persistence  
57  
58 with DAPT was estimated by identification of consecutive months with pharmacy refills  
59  
60

1  
2  
3 with one container of each agent in the 12-month period after hospital discharge.  
4  
5 Because pharmacy billing is registered in a monthly basis and the exact day of  
6 dispensation is unknown, we considered that a monthly dispensation until at least  
7  
8 month 11 after the index episode would approximate a 12-months treatment period. If  
9  
10 more than one container were dispensed in one month, the excess containers were  
11  
12 pulled along the following months. Non-persistence was defined as either  
13  
14 discontinuation or a break in therapy of at least two months after pulling along the  
15  
16 excess containers. To describe persistence over the whole study period we estimated  
17  
18 the proportion of patients alive and within the 12 months after discharge window who  
19  
20 were on treatment on each month[7].  
21  
22  
23  
24  
25  
26  
27  
28  
29  
30  
31  
32  
33  
34  
35  
36  
37

The primary outcome was a patient's persistence with DAPT for 12 months following discharge (or in other words, patients withdrawing both agents from the pharmacy until at least month 11).

### ***Statistical analysis***

38  
39  
40 We compared baseline characteristics between patients persisting with DAPT for at  
41  
42 least 12 months and patients withdrawing DAPT before 12 months with chi square test  
43  
44 or t test when appropriate. We tested for trends in patients' characteristics along  
45  
46 calendar year of discharge for the index procedure with Jonckheere-Terpstra test for  
47  
48 differences between ordered categories.  
49  
50  
51  
52  
53  
54

55 To evaluate the influence of time, guidelines publication and the DAPT duration  
56  
57 recommended in the PCI hospital discharge report we modelled logistic regression  
58  
59 based interrupted time-series analysis[8], adjusting for baseline characteristics. As a  
60

1  
2  
3 first step, because it is expected that guidelines publication influences practice with a  
4 time delay, we plotted the proportion of patients persisting on-DAPT for 12 months by  
5 year quarter of discharge from the PCI hospital and we tested models with a slope  
6 change (indicating the start of guideline implementation) at different lag periods after  
7 publication of the European clinical guidelines (last quarter of 2012). Once the lag  
8 period between guidelines publication and implementation of recommendations was  
9 estimated we included patient characteristics and second or third level interactions of  
10 each characteristic with year quarter and moment of implementation. We also  
11 included an autocorrelation term. We coded time ( $T$ ) as the time elapsed since the  
12 publication of guidelines plus the lag period (in quarters) and a dummy variable ( $X_t$ )  
13 indicating the pre-implementation period (coded 0) or the post-implementation period  
14 (coded 1)[9].

15  
16  
17  
18  
19  
20  
21  
22  
23  
24  
25  
26  
27  
28  
29  
30  
31  
32  
33  
34  
35 The standard model specification was the following:

$$\text{logit}(Y_t) = \beta_0 + \beta_1 T + \beta_2 X_t + \beta_3 T X_t$$

36  
37  
38  
39  
40  
41  
42 Where  $\beta_0$  represents the baseline level at  $T = 0$ ,  $\beta_1$  is interpreted as the change in  
43 outcome associated with a time unit (quarter) increase (representing the underlying  
44 pre-implementation trend),  $\beta_2$  is the level change following the implementation and  
45  $\beta_3$  indicates the slope change following the implementation (using the interaction  
46 between time and implementation:  $T X_t$ ). Additional terms can be added to model the  
47 effect of other covariables and their interactions with  $T$  and  $X_t$  and to include random  
48 effects. Note that we set  $T = 0$  at the quarter where we observed a significant change  
49 in the slope at a lag time after guidelines publication.  
50  
51  
52  
53  
54  
55  
56  
57  
58  
59  
60

1  
2  
3  
4  
5 We took into account the clustered structure of data with patients being treated and,  
6  
7  
8 most importantly, with recommendations on DAPT duration being provided in  
9  
10 different hospitals, by introducing random effects in the logistic regression models.

11  
12 We tested whether models including random intercepts for hospital and random  
13  
14 slopes for each independent variable were significant using a deviance-based test of  
15  
16 hypothesis.  
17  
18

19  
20  
21  
22 Variable selection for multilevel modelling was based on the bivariate associations  
23  
24 with the rate of each dependent variable. Candidate individual variables were those  
25  
26 described in tables 1 and 2. We retained in the final model all variables with a p  
27  
28 value < 0.2.  
29  
30

31  
32 Plots of predicted probability values were used to show marginal effects of variables of  
33  
34 interest and variability between centres.  
35  
36

### 37 38 39 ***Sensitivity analyses***

40  
41 Because a substantial proportion of patients were returned to their reference hospital  
42  
43 and because it was unknown whether the DAPT duration recommendation was  
44  
45 changed at discharge from the second hospital, we performed sensitivity analyses  
46  
47 excluding these patients. Additionally, because ischemic and haemorrhagic events  
48  
49 occurring during follow up would change the treatment length, sensitivity analyses  
50  
51 were also performed by excluding patients suffering any vascular event during follow  
52  
53 up.  
54  
55  
56  
57

### 58 59 ***Patient and Public Involvement***

60

Neither patients nor public were directly involved in the study.

## Results

After excluding patients with likely contraindication for DAPT (figure 1), we identified 10,711 STEACS patients undergoing PCI who were potential candidates to receive DAPT for at least 12 months and survived for at least one month after discharge. 631 (5.9%) patients experienced an ischemic major event (AMI or stroke) within 12 months after the index episode, 100 (0.9%) had a major haemorrhage and 280 (2.6%) died between one and 12 months after the index episode. After excluding patients who died or were lost to follow up and patients with errors in quarter allocations, 10,262 patients remained for analysis.

Table 1 shows characteristics of study patients depending on persistence with DAPT. Patients persisting for at least 12 months had higher prevalence of cardiovascular risk factors (hypertension, diabetes and hypercholesterolemia), higher rate of a previous history of cardiovascular disease, more extended coronary disease, higher rate of drug eluting stents implantation and slightly higher ischemic risk (as measured with the DAPT score[10]). Persisting patients were more often transferred to their reference hospital and had had a prescription for a longer DAPT period at discharge from the PCI hospital.

Table 1. Characteristics of study patients according to DAPT persistence during follow up.

|     | DAPT <12 months<br>(n=3684) |               | DAPT ≥ 12 months<br>(n=6578) |               | Total<br>(n=10262) |               | P value |
|-----|-----------------------------|---------------|------------------------------|---------------|--------------------|---------------|---------|
|     | N                           | n (%)         | N                            | n (%)         | N                  | n (%)         |         |
| Age | 3684                        | 61.19 ± 13.21 | 6578                         | 61.18 ± 12.38 | 10262              | 61.19 ± 12.69 | 0.578   |

1  
2  
3  
4  
5  
6  
7  
8  
9  
10  
11  
12  
13  
14  
15  
16  
17  
18  
19  
20  
21  
22  
23  
24  
25  
26  
27  
28  
29  
30  
31  
32  
33  
34  
35  
36  
37  
38  
39  
40  
41  
42  
43  
44  
45  
46  
47  
48  
49  
50  
51  
52  
53  
54  
55  
56  
57  
58  
59  
60

|                                                   |      |              |      |              |       |              |        |
|---------------------------------------------------|------|--------------|------|--------------|-------|--------------|--------|
| Gender (Female)                                   | 3684 | 765 (20.8%)  | 6578 | 1319 (20.1%) | 10262 | 2084 (20.3%) | 0.399  |
| Smoke (Y)                                         | 3684 | 1774 (48.2%) | 6578 | 3042 (46.2%) | 10262 | 4816 (46.9%) | 0.064  |
| Hypertension (Y)                                  | 3684 | 1622 (44%)   | 6578 | 3142 (47.8%) | 10262 | 4764 (46.4%) | <0.001 |
| Diabetes (Y)                                      | 3684 | 647 (17.6%)  | 6578 | 1298 (19.7%) | 10262 | 1945 (19%)   | 0.008  |
| Hypercholesterolaemia (Y)                         | 3684 | 1291 (35%)   | 6578 | 2678 (40.7%) | 10262 | 3969 (38.7%) | <0.001 |
| Polyvascular disease (Y)*                         | 3684 | 530 (14.4%)  | 6578 | 1048 (15.9%) | 10262 | 1578 (15.4%) | 0.038  |
| Previous stroke or transient ischaemic attack (Y) | 3684 | 101 (2.7%)   | 6578 | 172 (2.6%)   | 10262 | 273 (2.7%)   | 0.704  |
| Previous acute myocardial infarction (Y)          | 3684 | 265 (7.2%)   | 6578 | 570 (8.7%)   | 10262 | 835 (8.1%)   | 0.010  |
| Previous percutaneous coronary intervention (Y)   | 3684 | 194 (5.3%)   | 6578 | 482 (7.3%)   | 10262 | 676 (6.6%)   | <0.001 |
| Previous by-pass surgery (Y)                      | 3684 | 20 (0.5%)    | 6578 | 85 (1.3%)    | 10262 | 105 (1%)     | <0.001 |
| History of peripheral arteriopathy (Y)            | 3684 | 153 (4.2%)   | 6578 | 276 (4.2%)   | 10262 | 429 (4.2%)   | 0.957  |
| Comorbidity (Y)†                                  | 3684 | 462 (12.5%)  | 6578 | 885 (13.5%)  | 10262 | 1347 (13.1%) | 0.191  |
| Hepatopathy (Y)                                   | 3684 | 48 (1.3%)    | 6578 | 56 (0.9%)    | 10262 | 104 (1%)     | 0.030  |
| History of Renal Impairment (Y)                   | 3684 | 185 (5%)     | 6578 | 320 (4.9%)   | 10262 | 505 (4.9%)   | 0.741  |
| History of Heart Failure (Y)                      | 3684 | 272 (7.4%)   | 6578 | 583 (8.9%)   | 10262 | 855 (8.3%)   | 0.009  |
| Affected number of vessels ≥2 (Y)                 | 3684 | 1275 (34.6%) | 6578 | 2731 (41.5%) | 10262 | 4006 (39%)   | <0.001 |
| Number of treated vessels                         | 3613 | 1.03 ± 0.21  | 6516 | 1.06 ± 0.26  | 10129 | 1.05 ± 0.25  | <0.001 |
| Number of stents                                  | 3681 | 1.09±0.6     | 6563 | 1.21±0.68    | 10244 | 1.16±0.65    | <0.001 |
| Drug eluting stent (Y)                            | 3684 | 572 (15.5%)  | 6578 | 2704 (41.1%) | 10262 | 3276 (31.9%) | <0.001 |
| DAPT Score Points                                 | 3684 | 1.20 ± 1.20  | 6578 | 1.28 ± 1.17  | 10262 | 1.25 ± 1.18  | <0.001 |
| Discharged home (Y)                               | 3684 | 2233 (60.6%) | 6578 | 3672 (55.8%) | 10262 | 5905 (57.5%) | <0.001 |
| Antiplatelet agent at discharge                   | 3684 |              | 6578 |              | 10262 |              | <0.001 |
| Clopidogrel                                       |      | 3184 (86.4%) |      | 4872 (74.1%) |       | 8056 (78.5%) |        |
| Prasugrel                                         |      | 278 (7.5%)   |      | 1102 (16.8%) |       | 1380 (13.4%) |        |
| Ticagrelor                                        |      | 222 (6%)     |      | 604 (9.2%)   |       | 826 (8%)     |        |
| DAPT recommendation at discharge                  | 3684 |              | 6578 |              | 10262 |              | <0.001 |
| 1 month                                           |      | 875 (23.8%)  |      | 295 (4.5%)   |       | 1170 (11.4%) |        |
| <12 months                                        |      | 385 (10.5%)  |      | 173 (2.6%)   |       | 558 (5.4%)   |        |
| ≥12months                                         |      | 1522 (41.3%) |      | 4732 (71.9%) |       | 6254 (60.9%) |        |
| unknown                                           |      | 902 (24.5%)  |      | 1378 (20.9%) |       | 2280 (22.2%) |        |

\*Polyvascular disease was defined as presence of at least two of the following conditions: previous myocardial infarction or percutaneous coronary or surgical revascularization; history of peripheral arteriopathy; history of stroke or transient ischaemic attack. †Comorbidity was defined as presence of one of the following conditions: hepatopathy, history of renal impairment, history of heart failure

1  
2  
3 The rate of patients on-DAPT after discharge from the PCI hospital was 91% (95% CI:  
4 90-91) without relevant differences between years (supplemental figure 1). The  
5  
6 proportion of patients on-DAPT at 12 months significantly increased from 58% (56-61)  
7  
8 in 2010 to 73% (71-75) in 2015. The larger increase in 12-month persistence was  
9  
10 observed between 2014 (64% [62-66]) and 2015, two years after the publication of  
11  
12 clinical guidelines. The proportion of patients with prasugrel or ticagrelor instead of  
13  
14 clopidogrel started increasing after 2012 (supplemental figure 2).  
15  
16  
17  
18  
19  
20  
21  
22

23 Some baseline characteristics showed a temporal trend over the study period 2010-  
24  
25 2015 (table 2). The prevalence of cardiovascular risk factors (smoking, hypertension  
26  
27 and hypercholesterolemia) and comorbidities increased slightly. Likewise, the number  
28  
29 of treated vessels the rate of drug eluting stents implantation and the rate of prasugrel  
30  
31 or ticagrelor also increased with time.  
32  
33  
34  
35  
36  
37  
38  
39  
40  
41  
42  
43  
44  
45  
46  
47  
48  
49  
50  
51  
52  
53  
54  
55  
56  
57  
58  
59  
60



Table 2. Characteristics of study patients by year of discharge for the index admission.

|                                               | 2010 (n=1537) | 2011 (n=1628) | 2012 (n=1760) | 2013 (n=1779) | 2014 (n=1779) | 2015 (n=1779) | P value |
|-----------------------------------------------|---------------|---------------|---------------|---------------|---------------|---------------|---------|
| Age                                           | 61 ± 12.92    | 61.01 ± 13.09 | 60.97 ± 12.52 | 61.27 ± 12.4  | 61.24 ± 12.72 | 61.58 ± 12.53 | 0.325   |
| Gender                                        | 310 (20.2%)   | 311 (19.1%)   | 372 (21.1%)   | 359 (20.2%)   | 352 (19.8%)   | 380 (21.4%)   | 0.389   |
| Smoke                                         | 686 (44.6%)   | 754 (46.3%)   | 811 (46.1%)   | 839 (47.2%)   | 840 (47.2%)   | 886 (49.8%)   | 0.004   |
| Hypertension                                  | 674 (43.9%)   | 729 (44.8%)   | 808 (45.9%)   | 838 (47.1%)   | 844 (47.4%)   | 871 (49%)     | 0.001   |
| Diabetes                                      | 296 (19.3%)   | 319 (19.6%)   | 340 (19.3%)   | 327 (18.4%)   | 325 (18.3%)   | 338 (19%)     | 0.438   |
| Hypercholesterolaemia                         | 541 (35.2%)   | 621 (38.1%)   | 648 (36.8%)   | 710 (39.9%)   | 742 (41.7%)   | 707 (39.7%)   | <0.001  |
| Polyvascular disease*                         | 232 (15.1%)   | 253 (15.5%)   | 301 (17.1%)   | 259 (14.6%)   | 278 (15.6%)   | 255 (14.3%)   | 0.370   |
| Previous stroke or transient ischaemic attack | 42 (2.7%)     | 32 (2%)       | 45 (2.6%)     | 40 (2.2%)     | 65 (3.7%)     | 49 (2.8%)     | 0.126   |
| Previous acute myocardial infarction          | 127 (8.3%)    | 142 (8.7%)    | 163 (9.3%)    | 151 (8.5%)    | 127 (7.1%)    | 125 (7%)      | 0.029   |
| Previous percutaneous coronary intervention   | 94 (6.1%)     | 104 (6.4%)    | 123 (7%)      | 116 (6.5%)    | 118 (6.6%)    | 121 (6.8%)    | 0.485   |
| Previous by-pass surgery                      | 10 (0.7%)     | 16 (1%)       | 17 (1%)       | 19 (1.1%)     | 18 (1%)       | 25 (1.4%)     | 0.056   |
| History of peripheral arteriopathy            | 51 (3.3%)     | 70 (4.3%)     | 93 (5.3%)     | 66 (3.7%)     | 86 (4.8%)     | 63 (3.5%)     | 0.876   |
| Comorbidity†                                  | 155 (10.1%)   | 190 (11.7%)   | 233 (13.2%)   | 243 (13.7%)   | 266 (15%)     | 260 (14.6%)   | <0.001  |
| Hepatopathy                                   | 16 (1%)       | 12 (0.7%)     | 24 (1.4%)     | 24 (1.3%)     | 13 (0.7%)     | 15 (0.8%)     | 0.578   |
| History of Renal Impairment                   | 70 (4.6%)     | 75 (4.6%)     | 71 (4%)       | 86 (4.8%)     | 89 (5%)       | 114 (6.4%)    | 0.009   |
| History of Heart Failure                      | 80 (5.2%)     | 118 (7.2%)    | 154 (8.8%)    | 159 (8.9%)    | 187 (10.5%)   | 157 (8.8%)    | <0.001  |
| Affected number of vessels ≥2                 | 594 (38.6%)   | 617 (37.9%)   | 679 (38.6%)   | 707 (39.7%)   | 688 (38.7%)   | 721 (40.5%)   | 0.188   |
| Number of treated vessels                     | 1.04 ± 0.25   | 1.03 ± 0.23   | 1.05 ± 0.26   | 1.05 ± 0.24   | 1.05 ± 0.26   | 1.06 ± 0.24   | 0.003   |
| Number of stents                              | 1.23 ± 0.69   | 1.17 ± 0.60   | 1.18 ± 0.63   | 1.14 ± 0.66   | 1.12 ± 0.67   | 1.16 ± 0.66   | <0.001  |
| Drug eluting stent                            | 462 (30.1%)   | 388 (23.8%)   | 472 (26.8%)   | 493 (27.7%)   | 652 (36.6%)   | 809 (45.5%)   | <0.001  |
| DAPT Score Points                             | 1.24 ± 1.2    | 1.24 ± 1.19   | 1.26 ± 1.17   | 1.26 ± 1.17   | 1.22 ± 1.16   | 1.28 ± 1.19   | 0.435   |
| Discharged home                               | 961 (62.5%)   | 951 (58.4%)   | 933 (53%)     | 1042 (58.6%)  | 959 (53.9%)   | 1059 (59.5%)  | 0.041   |
| Antiplatelet agent at discharge               |               |               |               |               |               |               | <0.001  |
| Clopidogrel                                   | 1528 (99.4%)  | 1587 (97.5%)  | 1582 (89.9%)  | 1384 (77.8%)  | 1114 (62.6%)  | 861 (48.4%)   |         |
| Prasugrel                                     | 9 (0.6%)      | 38 (2.3%)     | 135 (7.7%)    | 244 (13.7%)   | 416 (23.4%)   | 538 (30.2%)   |         |

|                                  | 2010 (n=1537) | 2011 (n=1628) | 2012 (n=1760) | 2013 (n=1779) | 2014 (n=1779) | 2015 (n=1779) | P value |
|----------------------------------|---------------|---------------|---------------|---------------|---------------|---------------|---------|
| Ticagrelor                       | 0 (0%)        | 3 (0.2%)      | 43 (2.4%)     | 151 (8.5%)    | 249 (14%)     | 380 (21.4%)   |         |
| DAPT recommendation at discharge |               |               |               |               |               |               | <0.001  |
| 1 month                          | 281 (18.3%)   | 259 (15.9%)   | 243 (13.8%)   | 181 (10.2%)   | 135 (7.6%)    | 71 (4%)       |         |
| <12 months                       | 150 (9.8%)    | 137 (8.4%)    | 100 (5.7%)    | 69 (3.9%)     | 65 (3.7%)     | 37 (2.1%)     |         |
| ≥12 months                       | 792 (51.5%)   | 871 (53.5%)   | 975 (55.4%)   | 1086 (61%)    | 1154 (64.9%)  | 1376 (77.3%)  |         |
| unknown                          | 314 (20.4%)   | 361 (22.2%)   | 442 (25.1%)   | 443 (24.9%)   | 425 (23.9%)   | 295 (16.6%)   |         |

\*Polyvascular disease was defined as presence of at least two of the following conditions: previous myocardial infarction or percutaneous coronary or surgical revascularization; history of peripheral arteriopathy; history of stroke or transient ischaemic attack. †Comorbidity was defined as presence of one of the following conditions: hepatopathy, history of renal impairment, history of heart failure

1  
2  
3  
4  
5 The overall rate of explicit DAPT recommendation for at least 12 months in the  
6 hospital discharge reports was 51% (49-53) in 2010 and increased to 77% (75-79) in  
7  
8  
9  
10 2015 but it was highly variable between hospitals (supplemental figure 3).

11  
12  
13  
14  
15 Figure 2 shows the observed proportion of patients persisting with DAPT for at least 12  
16 months at each time point and the interrupted time series model fitted after setting a  
17  
18  
19  
20 one year lag period from publication to implementation of guidelines.  
21  
22

23  
24  
25 Table 3 shows results of the complete cases analysis (n=10,244) using interrupted time  
26 series logistic regression. Variables showing association with 12 month persistence on  
27  
28  
29  
30 DAPT were two or more diseased vessels, higher number of stents implanted, receiving  
31  
32  
33 drug eluting stents, hypercholesterolemia, a previous surgical procedure, taking  
34  
35 prasugrel instead of clopidogrel and a recommendation of DAPT for a longer period at  
36  
37 discharge from the PCI hospital. Autocorrelation was not significant. Guideline  
38  
39 implementation had a positive effect on persistence: a 20% increase in the odds of 12  
40  
41  
42 month persistence each quarter after a lag of one year since publication. The effect of  
43  
44  
45 drug eluting stents was attenuated with time (OR for interaction: 0.96; 95%CI: 0.94-  
46  
47 0.97) while the effect of prescription was attenuated with time after guideline  
48  
49 implementation (OR for the interaction 0.86, 95%CI: 0.79-0.94 for a recommendation  
50  
51 of  $\geq 12$  months and 0.88, 95%CI: 0.81-0.97 for an unknown recommendation). The  
52  
53  
54 effect of implantation of drug eluting stents and type of recommendation also varied  
55  
56  
57 between hospitals (significant random slopes).  
58  
59  
60

Table 3. Factors associated with a persistence of at least 12 months as assessed with interrupted time series logistic regression model

| <b>Fixed effects</b>                                                                                 | <b>OR</b>       | <b>95% CI</b> | <b>P value</b> |
|------------------------------------------------------------------------------------------------------|-----------------|---------------|----------------|
| Drug eluting stent                                                                                   | 1.90            | 1.50 - 2.40   | <0.001         |
| Number of stents                                                                                     | 1.22            | 1.13 - 1.32   | <0.001         |
| Antiplatelet agent at discharge (Ref. Clopidogrel)                                                   |                 |               |                |
| Prasugrel                                                                                            | 1.59            | 0.88 – 1.26   | <0.001         |
| Ticagrelor                                                                                           | 1.05            | 1.36 – 1.86   | 0.575          |
| Recommendation at PCI hospital discharge (Ref. 1 month)                                              |                 |               |                |
| <12 months                                                                                           | 1.67            | 0.89 - 3.14   | 0.110          |
| ≥12 months                                                                                           | 5.76            | 3.26 - 10.2   | <0.001         |
| unknown                                                                                              | 2.25            | 0.84 - 6.01   | 0.107          |
| Hypercholesterolemia                                                                                 | 1.19            | 1.08 - 1.31   | <0.001         |
| Previous by-pass surgery                                                                             | 1.85            | 1.09 - 3.14   | 0.023          |
| Two or more treated vessels                                                                          | 1.21            | 1.10 - 1.33   | <0.001         |
| Drug eluting stent * Time (quarter)                                                                  | 0.96            | 0.94 - 0.97   | <0.001         |
| Guideline implementation                                                                             | 1.20            | 1.11 - 1.30   | <0.001         |
| Recommendation at PCI hospital discharge (Ref. 1 month) *<br>Time (quarter)*Guideline implementation |                 |               |                |
| <12 months                                                                                           | 0.90            | 0.79 - 1.04   | 0.144          |
| ≥ 12 months                                                                                          | 0.86            | 0.79 - 0.94   | <0.001         |
| unknown                                                                                              | 0.88            | 0.81 - 0.97   | 0.007          |
| <b>Random effects</b>                                                                                | <b>Variance</b> | <b>95% CI</b> |                |
| Random - Intercept                                                                                   | 0.46            | 0.22 – 1.53   |                |
| Random - Slopes                                                                                      |                 |               |                |
| Recommendation at PCI hospital discharge (Ref. 1 month)                                              |                 |               |                |
| <12 months                                                                                           | 0.37            | 0.17 – 1.23   |                |
| ≥12 months                                                                                           | 0.39            | 0.19 – 1.31   |                |
| unknown                                                                                              | 1.97            | 0.93 – 6.58   |                |
| Drug eluting stent                                                                                   | 0.10            | 0.05 – 0.33   |                |
| Adjusted ICC                                                                                         | 0.085           |               |                |

Results of sensitivity analyses, excluding patients with ischemic or haemorrhagic events during follow up, or excluding patients that were transferred to another centre after PCI were similar to the main analysis (Supplemental table 3S).

The interaction between drug eluting stents and time can be seen in figure 3A. Because 12-months persistence increased with time in patients without drug eluting

1  
2  
3 stents, the effect of type of stent is attenuated with time. The interaction of the  
4  
5 recommendation pattern with time and guideline implementation can be seen in  
6  
7 figure 3B: 12-months persistence increased with time mainly in the subgroups with  
8  
9 shorter time specification in the discharge report and also in patients without a specific  
10  
11 recommendation, but this increase started after guideline implementation (one year  
12  
13 after publication). Figure 3C shows a substantial reduction in the variability between  
14  
15 centres mainly due to an increase in the proportion of 12-months persistence in  
16  
17 patients attended in centres where the initial proportion was lower (significant  
18  
19 random intercept and slopes).  
20  
21  
22  
23  
24  
25  
26  
27

## 28 Discussion

29  
30 According to published guidelines, all STEACS patients undergoing PCI without  
31  
32 contraindication should be kept on DAPT for at least 12 months unless an event occurs  
33  
34 that precludes continuing with this treatment. In this observational region-wide study  
35  
36 we have found an increase in the proportion of patients on-DAPT at 12 months from  
37  
38 58 to 73% in the period from 2010 to 2015, with an accelerated rate starting in the  
39  
40 fourth quarter of 2013, one year after the publication of European guidelines.  
41  
42  
43  
44  
45  
46

47 We also found a high variability between hospitals in the adherence to guidelines  
48  
49 when recommending DAPT for at least 12 months which leads to substantial  
50  
51 differences between hospitals in the rate of patients persisting with the recommended  
52  
53 DAPT. The progressive increase in the overall rate of 12-months persistence was  
54  
55 accompanied by a substantial reduction of interhospital variability.  
56  
57  
58  
59  
60

1  
2  
3 Likelihood of patients persisting with DAPT for one year is strongly related to the  
4  
5 instructions given at the PCI hospital discharge, as we observed a lower rate of 12-  
6  
7 month persistence in patients receiving a discharge DAPT recommendation for less  
8  
9 than 12 months. Although a causal direct relationship between the established  
10  
11 recommendation in the more specialised setting and the final prescription at the  
12  
13 primary care setting cannot be stated on the basis of observational data, this finding  
14  
15 suggests that prescribing physicians strongly rely on the first recommendation  
16  
17 specified at the discharge report in the PCI hospital. Therefore, hospital cardiologists  
18  
19 should be kept aware of their impact and encouraged to be clear and specific enough  
20  
21 when providing DAPT time recommendations in the discharge report form.  
22  
23  
24  
25  
26  
27  
28  
29

30 The recommendation in clinical guidelines of DAPT for at least 12 months following  
31  
32 STEACS[1,2] was based on the duration of follow up of randomised clinical trials  
33  
34 designed for other purposes[11–13] and, although a 12-month treatment seemed  
35  
36 reasonable [14], no randomized studies had been performed within the study period  
37  
38 aimed specifically at comparing 12 months DAPT with shorter periods in STEACS  
39  
40 patients receiving PCI and thus this recommendation might well be seen as somehow  
41  
42 arbitrary by some prescribers.  
43  
44  
45  
46  
47  
48  
49

50 In 2015 the need for long term DAPT was reinforced by the recommendation of  
51  
52 extended DAPT beyond 12 months in patients with ACS receiving drug eluting  
53  
54 stents[15–17], but still safety concerns might induce some prescribers to be reluctant  
55  
56 to prolong DAPT, especially in patients with higher complexity[18]. Safety concerns  
57  
58 might also explain the high proportion of discharge reports with non-specified DAPT  
59  
60

1  
2  
3 period, which deserved special attention in our analyses. Cardiologists might be  
4  
5 reluctant to prescribe a specific duration of DAPT maybe fearing about the emergency  
6  
7 of events that increase the haemorrhagic risk at some point after discharge, thus  
8  
9 relying on the follow up that will be made at the ambulatory setting. Our results  
10  
11 showing a high degree of persistence for patients without a specification of DAPT time  
12  
13 point out to the fact that this decision is not necessarily “incorrect”, and that health  
14  
15 providers coming later in the process of care are probably doing their job.  
16  
17  
18  
19  
20  
21  
22

23 We might wonder whether the observed high variability between hospitals in the  
24  
25 instructions provided about DAPT duration actually reflects suboptimal quality of care  
26  
27 or confusion in the interpretation of international guidelines. In fact, although 2012  
28  
29 ESC guidelines state that DAPT must be continued for 12 months after STEACS with a  
30  
31 class of recommendation I, the level of evidence was established as C[1]. Thus, there  
32  
33 was general agreement that a minimum of 12 months of DAPT is likely to be beneficial  
34  
35 but based only on a consensus of experts or observational studies. Moreover, it is  
36  
37 literally stated that the given recommendation on DAPT duration should be “with a  
38  
39 strict minimum of 1 month for patients receiving BMS and 6 months for patients  
40  
41 receiving DES”, with Class IC and IIb respectively. These messages, which ultimately  
42  
43 reflected the lack of clinical trials aimed to answer the specific question about DAPT  
44  
45 duration, could have induced a perception of arbitrariness leading to variability in  
46  
47 clinical practice.  
48  
49  
50  
51  
52  
53  
54  
55  
56

57 In fact, the optimal duration of DAPT has not yet been totally established in more  
58  
59 contemporary clinical trials. The most recent randomized clinical trial conducted in  
60

1  
2  
3 patients with STEACS aimed to assess the question of 12-month vs a 6-month DAPT  
4  
5 duration, showed that 6-month DAPT duration after primary PCI was non-inferior to  
6  
7 12-month duration to prevent major cardiovascular events[19]. In another trial in the  
8  
9 context of ACS, 12 months or longer DAPT duration versus 6 months was not  
10  
11 associated with lower major cardiovascular events and total mortality[20].  
12  
13  
14  
15  
16

17  
18 Regardless the level of the evidence, one would expect that a Class I recommendation  
19  
20 should be uniformly followed by clinicians. Moreover, as patient characteristics did not  
21  
22 substantially differed across hospitals, we should expect a lower variability between  
23  
24 hospitals. A large variation in individual country practices concerning the pattern of  
25  
26 DAPT duration after ACS has been described, suggesting that local systems are strong  
27  
28 drivers of DAPT duration[21]. These findings may imply that there is still room for  
29  
30 improvement in the quality of care of STEACS patients and that quality improvement  
31  
32 programs, whose efficacy and cost-effectiveness are still under evaluation, could be  
33  
34 useful to reduce variability in clinical practice[22]. This is of prime importance in the  
35  
36 context of the prescription of DAPT duration after ACS in which the clinician-driven  
37  
38 variability in prescription patterns adds to the different levels patients' adherence[21].  
39  
40 Higher atherosclerotic burden and increased ischemic risk was associated to better  
41  
42 persistence with DAPT. The need for 12-month DAPT schedules in patients treated  
43  
44 with drug eluting stents is clearly perceived by physicians but the magnitude of this  
45  
46 association varies largely between hospitals. This means that, even in clear indications,  
47  
48 there are different levels of adoption of emerging clinical recommendations in  
49  
50 hospitals belonging to the same AMI network.  
51  
52  
53  
54  
55  
56  
57  
58  
59  
60



1  
2  
3 It is also apparent from our data that the speed of adoption of clinical guidelines is  
4  
5 different among hospitals and that an acceptable and generalised level of adherence is  
6  
7 only reached after two years of implementation. Similar trends have been found in  
8  
9 other contexts and earlier periods[23–28] reporting DAPT use between 60-80% at  
10  
11 discharge and between 25-75 % at one year. In this sense, together with other quality  
12  
13 improvement initiatives, the use of population-based registries to provide audit and  
14  
15 feedback could be useful to promote quicker and smoother adoption of clinical  
16  
17 practice guidelines[29].  
18  
19  
20  
21  
22  
23  
24

25 There are a number of assumptions that might be questionable: A number of factors  
26  
27 have been described to contribute to underprescription[30]. The complete process of  
28  
29 care and the definite prescription at the ambulatory setting is poorly known for  
30  
31 individual patients and has not been considered in this study. Changes in treatment  
32  
33 prescription might be justified by the patients' varying conditions during follow up. We  
34  
35 assume that hospital recommendation influences final prescription, and consequently,  
36  
37 final adherence to guidelines, but it can also be that both "prescribers" facing the same  
38  
39 patient share the same criteria for prescription. I.e. the hospital cardiologist might  
40  
41 have decided to recommend DAPT for a shorter period to an elderly patient with other  
42  
43 comorbidities and suboptimal quality of life due to mild digestive symptoms, even if  
44  
45 her objective bleeding risk is not high; similarly, the primary physician or the  
46  
47 cardiologist at the primary care setting might have also decided to be less aggressive  
48  
49 for the same reasons, even without being influenced by the recommendation of the  
50  
51 first prescriber. This would probably explain a large amount of the strong relationship  
52  
53 between hospital recommendation and pharmacy dispensation. Moreover, although  
54  
55  
56  
57  
58  
59  
60

1  
2  
3 effects were adjusted for patient characteristics and vascular events during follow up,  
4  
5 there might be other unmeasured reasons for deciding upon a shorter DAPT period  
6  
7  
8 facing an individual patient.  
9

10  
11  
12 In addition, the recommendation at PCI hospital discharge may not coincide with the  
13  
14 final hospital prescription in patients derived to another reference hospital after PCI.  
15  
16 However, results of sensitivity analyses excluding these patients did not differ  
17  
18 substantially from the results of the main analyses.  
19  
20  
21

22  
23  
24 The study was aimed to ascertain influence of guidelines on hospital recommendation  
25  
26 and its impact on patients' persistence with DAPT. The impact of persistence on  
27  
28 clinically relevant results will be assessed in another article. Similarly, the study was  
29  
30 not specifically aimed at a deep assessment of determinants of adherence. This  
31  
32 requires a detailed examination of the social context and a detailed assessment of  
33  
34 individual psychological factors[31].  
35  
36  
37  
38  
39  
40  
41

## 42 **Conclusion**

43  
44 The study shows that 12-month DAPT persistence in revascularized patients with  
45  
46 STEACS in Catalonia (Spain) has substantially increased between years 2010 to 2015  
47  
48 especially since one year after the publication of European guidelines in 2012.  
49  
50 Guideline implementation was also followed by a substantial decrease in variability  
51  
52 between centres. We have shown that instructions given at the PCI hospital discharge  
53  
54 are strongly associated with persistence. Thus establishing common and rational  
55  
56 prescribing criteria between hospitals in the STEACS-network may favour patients  
57  
58  
59  
60

1  
2  
3 persistence with scheduled prescriptions and also reduce variability in clinicians'  
4  
5 practices.  
6  
7  
8  
9

### 10 11 **Author contributions**

12  
13  
14  
15 IFG, AR, JRM conceived and designed the study; AR, JRM and MTF participated in the  
16  
17 acquisition and analysis of data; HTM, SR, CL, MC, SH, CTQ, JGP, JAGH and MM were  
18  
19 responsible for data acquisition in their respective hospitals; AR, IFG, JRM, GO, AR, JIP,  
20  
21 JM and DGD were involved in the interpretation of results; AR and IFG wrote the  
22  
23 manuscript and all other authors revised it critically and approved its final version  
24  
25  
26  
27

28  
29 The AMI-Code Registry Investigators (listed below) contribute to the functioning of the  
30  
31 AMI code and to data acquisition for the AMI-Code Registry:  
32  
33

34  
35 C. Carvajal, P. Martínez, RM. Lidón, J. Bañeras (Hospital Universitari de la Vall  
36  
37 d'Hebrón, Barcelona), J. Garcia-Picart (Hospital de la Santa Creu i Sant Pau, Barcelona),  
38  
39 M. Massotti, G. Jiménez, M. Hernández, A. Regueiro (Hospital Clinic, Barcelona), J.  
40  
41 Basaganyas, P. Loma, M. Cardenas, E. Badosa, A. Fageda (Hospital Josep Trueta,  
42  
43 Girona) A. Ariza, C. García-Amigó, A. Cequier, A. Gómez-Hospital, G. Marín, J.  
44  
45 Maristany, V. Montoya (Hospital Universitari de Bellvitge, Hospitalet) , C. Labata, J.  
46  
47 Mauri, E. Fernández-Nofrerias, X. Carrillo, C. Garcia-Garcia, C. Oliete, (Hospital  
48  
49 Universitari Germans Trias i Pujol, Badalona) A. Bardaji, G. Bonet-Pineda, S. Rojas  
50  
51 (Hospital Joan XXIII, Tarragona). Juan F. Muñoz, F. Padilla, S. Homs (Hospital Mútua de  
52  
53 Terrassa, Terrassa), B. Baquerizo, L. Recasens, H. Tizon-Marcos (Hospital de Mar IMAS,  
54  
55 Barcelona), A. Bosch Gaya, F. Worner, L. Barta, M. Agustí, A. Gené (Hospital Arnau de  
56  
57  
58  
59  
60

1  
2  
3 Vilanova, LLeida), X. Jimenez, A. Mora (Sistema d'Emergencies Mèdiques SEM SA,  
4  
5 Barcelona), MT. Faixedas, J. Jiménez, A. Rosas (Health Department. Generalitat de  
6  
7 Catalunya).  
8  
9  
10  
11  
12  
13  
14  
15  
16  
17  
18  
19  
20  
21  
22  
23  
24  
25  
26  
27  
28  
29  
30  
31  
32  
33  
34  
35  
36  
37  
38  
39  
40  
41  
42  
43  
44  
45  
46  
47  
48  
49  
50  
51  
52  
53  
54  
55  
56  
57  
58  
59  
60

For peer review only

## References

- 1 Steg PG, James SK, Atar D, *et al.* ESC Guidelines for the management of acute myocardial infarction in patients presenting with ST-segment elevation: The Task Force on the management of ST-segment elevation acute myocardial infarction of the European Society of Cardiology (ESC). *Eur Heart J* 2012;**33**:2569–619. doi:10.1093/eurheartj/ehs215
- 2 O’Gara PT, Kushner FG, Ascheim DD, *et al.* 2013 ACCF/AHA Guideline for the Management of ST-Elevation Myocardial Infarction: A Report of the American College of Cardiology Foundation/American Heart Association Task Force on Practice Guidelines. *Circulation* 2013;**127**:e362–425. doi:10.1161/CIR.0b013e3182742cf6
- 3 Osterberg L, Blaschke T. Adherence to medication. *N Engl J Med* 2005;**353**:487–97. doi:10.1056/NEJMra050100
- 4 Carrillo X, Fernandez-Nofrerias E, Rodriguez-Leor O, *et al.* Early ST elevation myocardial infarction in non-capable percutaneous coronary intervention centres: *in situ* fibrinolysis vs. percutaneous coronary intervention transfer. *Eur Heart J* 2016;**37**:1034–40. doi:10.1093/eurheartj/ehv619
- 5 Regueiro A, Bosch J, Martín-Yuste V, *et al.* Cost-effectiveness of a European ST-segment elevation myocardial infarction network: results from the Catalan Codi Infart network. *BMJ Open* 2015;**5**:e009148. doi:10.1136/bmjopen-2015-009148
- 6 Swieczkowski D, Mogielnicki M, Cwalina N, *et al.* Medication adherence in patients after percutaneous coronary intervention due to acute myocardial infarction: From research to clinical implications. *Cardiol J* 2016;**23**:483–90.

- 1  
2  
3 doi:10.5603/CJ.a2016.0048  
4  
5  
6 7 Gislason GH, Rasmussen JN, Abildstrøm SZ, *et al.* Long-term compliance with  
7  
8 beta-blockers, angiotensin-converting enzyme inhibitors, and statins after acute  
9  
10 myocardial infarction. *Eur Heart J* 2006;**27**:1153–8.  
11  
12 doi:10.1093/eurheartj/ehi705  
13  
14  
15 8 Kontopantelis E, Doran T, Springate DA, *et al.* Regression based quasi-  
16  
17 experimental approach when randomisation is not an option: Interrupted time  
18  
19 series analysis. *BMJ* Published Online First: 2015. doi:10.1136/bmj.h2750  
20  
21  
22 9 Bernal JL, Cummins S, Gasparrini A. Interrupted time series regression for the  
23  
24 evaluation of public health interventions: A tutorial. *Int J Epidemiol* Published  
25  
26 Online First: 2017. doi:10.1093/ije/dyw098  
27  
28  
29  
30 10 Yeh RW, Secemsky EA, Kereiakes DJ, *et al.* Development and Validation of a  
31  
32 Prediction Rule for Benefit and Harm of Dual Antiplatelet Therapy Beyond 1 Year  
33  
34 After Percutaneous Coronary Intervention. *JAMA* 2016;**315**:1735.  
35  
36 doi:10.1001/jama.2016.3775  
37  
38  
39  
40 11 Yusuf S, Zhao F, Mehta SR, *et al.* Effects of Clopidogrel in Addition to Aspirin in  
41  
42 Patients with Acute Coronary Syndromes without ST-Segment Elevation. *N Engl J*  
43  
44 *Med* 2001;**345**:494–502. doi:10.1056/NEJMoa010746  
45  
46  
47 12 Wiviott SD, Braunwald E, McCabe CH, *et al.* Prasugrel versus Clopidogrel in  
48  
49 Patients with Acute Coronary Syndromes. *N Engl J Med* 2007;**357**:2001–15.  
50  
51 doi:10.1056/NEJMoa0706482  
52  
53  
54 13 Wallentin L, Becker RC, Budaj A, *et al.* Ticagrelor versus Clopidogrel in Patients  
55  
56 with Acute Coronary Syndromes. *N Engl J Med* 2009;**361**:1045–57.  
57  
58 doi:10.1056/NEJMoa0904327  
59  
60

- 1  
2  
3 14 Eisenstein EL, Anstrom KJ, Kong DF, *et al.* Clopidogrel Use and Long-term Clinical  
4  
5 Outcomes After Drug-Eluting Stent Implantation. *JAMA* 2007;**297**:159.  
6  
7  
8 doi:10.1001/jama.297.2.joc60179  
9
- 10 15 Bonaca MP, Bhatt DL, Cohen M, *et al.* Long-Term Use of Ticagrelor in Patients  
11  
12 with Prior Myocardial Infarction. *N Engl J Med* 2015;**372**:1791–800.  
13  
14  
15 doi:10.1056/NEJMoa1500857  
16
- 17 16 Mauri L, Kereiakes DJ, Yeh RW, *et al.* Twelve or 30 Months of Dual Antiplatelet  
18  
19 Therapy after Drug-Eluting Stents. *N Engl J Med* 2014;**371**:2155–66.  
20  
21  
22 doi:10.1056/NEJMoa1409312  
23
- 24 17 Levine GN, Bates ER, Bittl JA, *et al.* 2016 ACC/AHA Guideline Focused Update on  
25  
26 Duration of Dual Antiplatelet Therapy in Patients With Coronary Artery Disease:  
27  
28 A Report of the American College of Cardiology/American Heart Association  
29  
30 Task Force on Clinical Practice Guidelines. *J Am Coll Cardiol* 2016;**68**:1082–115.  
31  
32  
33 doi:10.1016/j.jacc.2016.03.513  
34
- 35 18 Tinetti ME, Bogardus ST, Agostini J V. Potential Pitfalls of Disease-Specific  
36  
37 Guidelines for Patients with Multiple Conditions. *N Engl J Med* 2004;**351**:2870–  
38  
39 4. doi:10.1056/NEJMsb042458  
40  
41  
42  
43
- 44 19 Kedhi E, Fabris E, van der Ent M, *et al.* Six months versus 12 months dual  
45  
46 antiplatelet therapy after drug-eluting stent implantation in ST-elevation  
47  
48 myocardial infarction (DAPT-STEMI): randomised, multicentre, non-inferiority  
49  
50 trial. *BMJ* 2018;**363**:k3793. doi:10.1136/bmj.k3793  
51  
52  
53
- 54 20 Hahn J-Y, Song Y Bin, Oh J-H, *et al.* 6-month versus 12-month or longer dual  
55  
56 antiplatelet therapy after percutaneous coronary intervention in patients with  
57  
58 acute coronary syndrome (SMART-DATE): a randomised, open-label, non-  
59  
60

- 1  
2  
3 inferiority trial. *Lancet* 2018;**391**:1274–84. doi:10.1016/S0140-6736(18)30493-8  
4  
5  
6 21 Bueno H, Pocock S, Danchin N, *et al.* International patterns of dual antiplatelet  
7  
8 therapy duration after acute coronary syndromes. *Heart* 2017;**103**:132–8.  
9  
10 doi:10.1136/heartjnl-2016-309509  
11  
12  
13 22 Flather MD, Babalis D, Booth J, *et al.* Cluster-randomized trial to evaluate the  
14  
15 effects of a quality improvement program on management of non–ST-elevation  
16  
17 acute coronary syndromes: The European Quality Improvement Programme for  
18  
19 Acute Coronary Syndromes (EQUIP-ACS). *Am Heart J* 2011;**162**:700–707.e1.  
20  
21  
22 doi:10.1016/j.ahj.2011.07.027  
23  
24  
25 23 Czarny MJ, Nathan AS, Yeh RW, *et al.* Adherence to Dual Antiplatelet Therapy  
26  
27 After Coronary Stenting: A Systematic Review. *Clin Cardiol* 2014;**37**:505–13.  
28  
29  
30 doi:10.1002/clc.22289  
31  
32  
33 24 Green A, Pottegård A, Broe A, *et al.* Initiation and persistence with dual  
34  
35 antiplatelet therapy after acute myocardial infarction: A Danish nationwide  
36  
37 population-based cohort study. *BMJ Open* 2016;**6**. doi:10.1136/bmjopen-2015-  
38  
39 010880  
40  
41  
42 25 Anastasius M, Lau JK, Hyun K, *et al.* The underutilisation of dual antiplatelet  
43  
44 therapy in acute coronary syndrome. *Int J Cardiol* 2017;**240**:30–6.  
45  
46  
47 doi:10.1016/j.ijcard.2017.04.077  
48  
49  
50 26 Prami T, Khanfir H, Deleskog A, *et al.* Clinical factors associated with initiation of  
51  
52 and persistence with ADP receptor-inhibiting oral antiplatelet treatment after  
53  
54 acute coronary syndrome: a nationwide cohort study from Finland. *BMJ Open*  
55  
56 2016;**6**:e012604. doi:10.1136/bmjopen-2016-012604  
57  
58  
59 27 Varenhorst C, Jensevik K, Jernberg T, *et al.* Duration of dual antiplatelet  
60



- 1  
2  
3 treatment with clopidogrel and aspirin in patients with acute coronary  
4  
5 syndrome. *Eur Heart J* 2014;**35**:969–78. doi:10.1093/eurheartj/eh438  
6  
7
- 8 28 Chung S-C, Sundström J, Gale CP, *et al.* Comparison of hospital variation in acute  
9  
10 myocardial infarction care and outcome between Sweden and United Kingdom:  
11  
12 population based cohort study using nationwide clinical registries. *Br Med J*  
13  
14 2015;**351**:h3913. doi:10.1136/BMJ.H3913  
15  
16
- 17 29 Eisenstein EL, Wojdyla D, Anstrom KJ, *et al.* Evaluating the impact of public  
18  
19 health notification: Duke clopidogrel experience. *Circ Cardiovasc Qual Outcomes*  
20  
21 2012;**5**:767–74. doi:10.1161/CIRCOUTCOMES.111.963330  
22  
23  
24
- 25 30 Cabana MD, Rand CS, Powe NR, *et al.* Why don't physicians follow clinical  
26  
27 practice guidelines? A framework for improvement. *JAMA* 1999;**282**:1458–  
28  
29 65.<http://www.ncbi.nlm.nih.gov/pubmed/10535437> (accessed 28 Nov 2017).  
30  
31
- 32 31 Ferreira-Gonzalez I, Marsal JR, Ribera A, *et al.* Background, Incidence, and  
33  
34 Predictors of Antiplatelet Therapy Discontinuation During the First Year After  
35  
36 Drug-Eluting Stent Implantation. *Circulation* 2010;**122**:1017–25.  
37  
38  
39  
40  
41  
42  
43  
44  
45  
46  
47  
48  
49  
50  
51  
52  
53  
54  
55  
56  
57  
58  
59  
60

## Figure legends

Figure 1. Patients flow

Figure 2. Observed proportion of patients persisting with DAPT for at least 12 months at each quarter and the interrupted time series model fitted after setting a one year lag period from publication to implementation of guidelines.

Figure 3. Temporal trend of interhospital variability in 12 months DAPT recommendation at the PCI hospital, measured as the percentage of variance explained by the hospital level (intraclass correlation and 95 % CI). Vertical dashed line indicates publication of guidelines.

1  
2  
3  
4  
5  
6  
7  
8  
9  
10  
11  
12  
13  
14  
15  
16  
17  
18  
19  
20  
21  
22  
23  
24  
25  
26  
27  
28  
29  
30  
31  
32  
33  
34  
35  
36  
37  
38  
39  
40  
41  
42  
43  
44  
45  
46  
47  
48  
49  
50  
51  
52  
53  
54  
55  
56  
57  
58  
59  
60

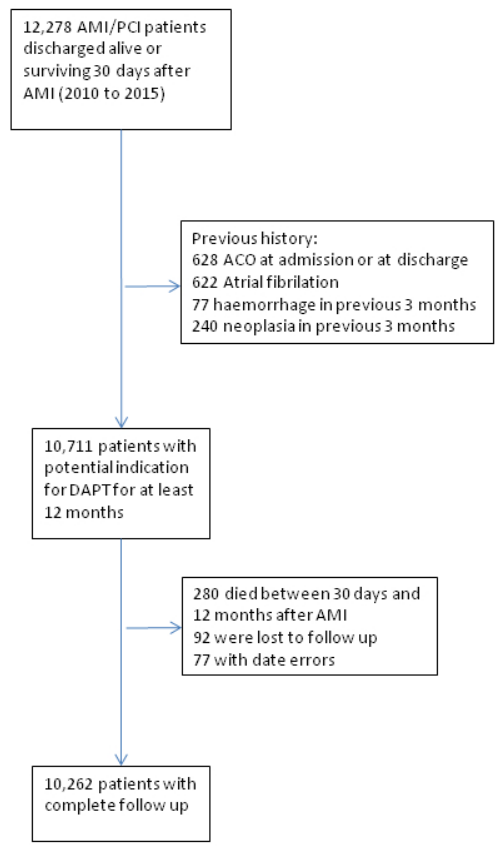

Figure 1. Patients flow  
190x254mm (96 x 96 DPI)

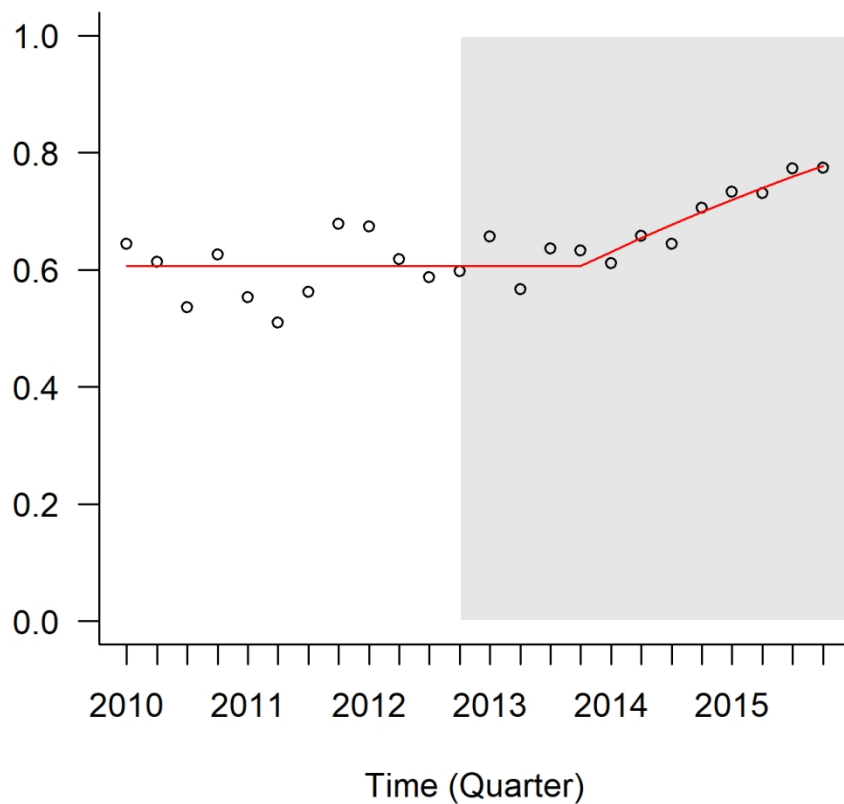

Figure 2. Observed 12-months persistence rate by quarter and interrupted time series model specification after setting a one year lag period for guidelines implementation

127x127mm (300 x 300 DPI)

1  
2  
3  
4  
5  
6  
7  
8  
9  
10  
11  
12  
13  
14  
15  
16  
17  
18  
19  
20  
21  
22  
23  
24  
25  
26  
27  
28  
29  
30  
31  
32  
33  
34  
35  
36  
37  
38  
39  
40  
41  
42  
43  
44  
45  
46  
47  
48  
49  
50  
51  
52  
53  
54  
55  
56  
57  
58  
59  
60

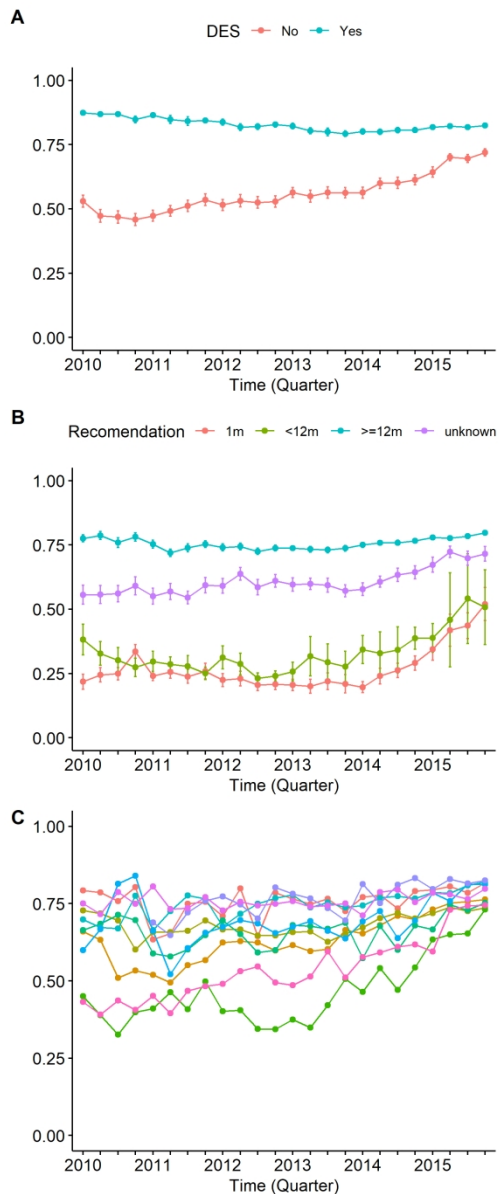

Figure 3. Predicted probabilities of 12-months persistence by (A) drug eluting stent, (B) recommendation pattern and (C) center, over time

127x304mm (300 x 300 DPI)

## Supplemental methods

### Data validation processes in the AMI Code registry

1. Automatic data validation processes to identify and feed-back missing data and incongruities.

2. Periodic data validation process every 3-6 months:

Since year 2011 this process was automated. The system automatically detects missing information in key variables and the identification of AMI codes that were activated by the emergency services (before admission) and were not included in the registry. Feed back for data validation is sent every 3-6 months for amendment or justification to the person responsible for data entry at each AMI Code Hospital.

Since year 2015 the automated process can be managed directly at any time by the person responsible for data entry in each hospital.

3. Specific studies:

In 2012 data were evaluated for **exhaustiveness**: all AMI cases consecutively admitted in 43 hospitals in Catalonia (10 AMI Code hospitals and 32 no AMI Code hospitals) during a 3 months period were registered and compared with the episodes registered in the AMI Code registry.

Between 88-92% of STEACS episodes were included in the AMI Code registry.

In 2013 concordance of the information between the AMI Code registry and the information from clinical records was assessed. 330 cases were analyzed and concordance was good for all key variables and there were no differences between hospitals.

1 **Supplemental tables**

2  
3  
4 Supplemental table 1. ICD9 codes used for the identification of conditions and diseases present at index  
5  
6 admission and for the identification of events during follow up.

7  
8  
9

| Disease or condition                  | ICD9 diagnostic or procedure code                                                                                                                                                                                                                     |
|---------------------------------------|-------------------------------------------------------------------------------------------------------------------------------------------------------------------------------------------------------------------------------------------------------|
| Heart failure                         | 428.0, 428.1, 428.22, 428.23, 428.3, 428.32, 428.33, 428.41, 428.43                                                                                                                                                                                   |
| Renal disease                         | 585*                                                                                                                                                                                                                                                  |
| Neoplasia                             | 140-239                                                                                                                                                                                                                                               |
| Anemia                                | 280-285                                                                                                                                                                                                                                               |
| Chronic obstructive pulmonary disease | 491-492, 494*, 496*                                                                                                                                                                                                                                   |
| Peripheral arterial disease           | 440.2, 440.3, 440.4                                                                                                                                                                                                                                   |
| Atrial fibrillation                   | 427.3*                                                                                                                                                                                                                                                |
| <b>Events during follow up</b>        |                                                                                                                                                                                                                                                       |
| Acute myocardial infarction           | 410*, except: 410.*2                                                                                                                                                                                                                                  |
| Ischemic stroke                       | 433*, 434*, except: 433.*0, 434.*0                                                                                                                                                                                                                    |
| Haemorrhagic stroke                   | 430*, 431*, 432*                                                                                                                                                                                                                                      |
| Intraocular bleeding                  | 362.81, 363.6, 363.61, 363.62, 376.32, 377.42, 379.23                                                                                                                                                                                                 |
| Digestive bleeding                    | 530.21, 530.7, 530.82, 531.0, 531.2, 531.4, 531.6, 532.0, 532.2, 532.4, 532.6, 533.0, 533.2, 533.4, 534.4, 534.6, 535.01, 535.11, 535.21, 535.31, 535.41, 535.51, 535.61, 535.71, 537.83, 562.02, 562.03, 562.12, 562.13, 569.3, 569.85, 578.1, 578.9 |
| Other bleeding                        | 246.3, 459.0, 602.1, 784.8, 596.7, 599.7, 852*, 997.02, 998.1,                                                                                                                                                                                        |
| Endoscopic treatment                  | 444.3, 454.2, 454.3                                                                                                                                                                                                                                   |
| Transfusion                           | 990.4                                                                                                                                                                                                                                                 |

10  
11  
12  
13  
14  
15  
16  
17  
18  
19  
20  
21  
22  
23  
24  
25  
26  
27  
28  
29  
30  
31  
32  
33  
34  
35  
36  
37  
38  
39  
40  
41  
42  
43  
44  
45  
46  
47  
48  
49  
50  
51  
52  
53  
54  
55  
56  
57  
58  
59  
60

Supplemental table 2. ATC codes used for the identification of drug treatment

| <b>Drug treatment</b> | <b>ATC code</b>           |
|-----------------------|---------------------------|
| ASA                   | B01AC06, N02BA01, B01AC30 |
| Ticlopidine           | B01AC05                   |
| Clopidogrel           | B01AC04                   |
| Prasugrel             | B01AC22                   |
| Ticagrelor            | B01AC24                   |
| Dabigatran etexilate  | B01AE07                   |
| Rivaroxaban           | B01AF01                   |
| Apixaban              | B01AF02                   |
| Beta-blocker          | C07                       |
| ACE inhibitor         | C09                       |
| Statins               | C10AA                     |



Supplemental table 3. Factors associated with a persistence of at least 12 months as assessed with interrupted time series logistic regression model. Results of sensitivity analyses.

| Fixed Effects                                                                                      | Original Model |             |         | Discharged home |             |         | Non-ischemic or haemorrhagic events |             |         |
|----------------------------------------------------------------------------------------------------|----------------|-------------|---------|-----------------|-------------|---------|-------------------------------------|-------------|---------|
|                                                                                                    | OR             | CI95%       | P value | OR              | CI95%       | P value | OR                                  | CI95%       | P value |
| Drug eluting stent                                                                                 | 1.90           | 1.50 - 2.40 | <0.001  | 2.00            | 1.43 - 2.81 | <0.001  | 1.92                                | 1.54 - 2.39 | <0.001  |
| Number of Stents                                                                                   | 1.22           | 1.13 - 1.32 | <0.001  | 1.10            | 0.98 - 1.24 | 0.117   | 1.24                                | 1.15 - 1.35 | <0.001  |
| Antiplatelet agent at discharge (Ref. Clopidogrel)                                                 |                |             |         |                 |             |         |                                     |             |         |
| Prasugrelor                                                                                        | 1.59           | 0.88 - 1.26 | <0.001  | 1.72            | 1.34 - 2.20 | <0.001  | 1.63                                | 1.38 - 1.91 | <0.001  |
| Ticagrelor                                                                                         | 1.05           | 1.36 - 1.86 | 0.575   | 1.06            | 0.81 - 1.38 | 0.665   | 1.05                                | 0.87 - 1.27 | 0.614   |
| Recommendation at PCI hospital discharge (Ref. 1 month)                                            |                |             |         |                 |             |         |                                     |             |         |
| <12 months                                                                                         | 1.67           | 0.89 - 3.14 | 0.110   | 0.98            | 0.51 - 1.88 | 0.957   | 2.03                                | 0.97 - 4.24 | 0.059   |
| ≥ 12 months                                                                                        | 5.76           | 3.26 - 10.2 | <0.001  | 4.29            | 2.45 - 7.51 | <0.001  | 7.22                                | 4.09 - 12.8 | <0.001  |
| unknown                                                                                            | 2.25           | 0.84 - 6.01 | 0.107   | 2.81            | 1.33 - 5.93 | 0.007   | 2.62                                | 0.95 - 7.24 | 0.064   |
| Hyperlipidemia                                                                                     | 1.19           | 1.08 - 1.31 | <0.001  | 1.25            | 1.09 - 1.44 | 0.002   | 1.22                                | 1.11 - 1.35 | <0.001  |
| Previous by-pass surgery                                                                           | 1.85           | 1.09 - 3.14 | 0.023   | 1.11            | 0.51 - 2.41 | 0.795   | 1.91                                | 1.05 - 3.46 | 0.033   |
| Two or more treated vessels                                                                        | 1.21           | 1.10 - 1.33 | <0.001  | 1.27            | 1.10 - 1.46 | 0.001   | 1.12                                | 1.01 - 1.24 | 0.026   |
| Drug eluting stents * Time (quarter)                                                               | 0.96           | 0.94 - 0.97 | <0.001  | 0.97            | 0.94 - 0.99 | 0.006   | 0.96                                | 0.94 - 0.97 | <0.001  |
| Guidelines implementation                                                                          | 1.20           | 1.11 - 1.30 | <0.001  | 1.10            | 0.96 - 1.26 | 0.161   | 1.23                                | 1.14 - 1.34 | <0.001  |
| Recommendation at PCI hospital discharge (Ref. 1 month) * Time (quarter)*Guidelines implementation |                |             |         |                 |             |         |                                     |             |         |
| <12 months                                                                                         | 0.90           | 0.79 - 1.04 | 0.144   | 1.03            | 0.82 - 1.28 | 0.806   | 0.89                                | 0.78 - 1.03 | 0.118   |
| ≥12 months                                                                                         | 0.86           | 0.79 - 0.94 | <0.001  | 0.93            | 0.81 - 1.08 | 0.349   | 0.84                                | 0.77 - 0.92 | <0.001  |
| unknown                                                                                            | 0.88           | 0.81 - 0.97 | 0.007   | 0.97            | 0.84 - 1.12 | 0.678   | 0.86                                | 0.78 - 0.94 | 0.001   |
| Random Effects                                                                                     | Var.           | 95% CI      |         | Var.            | 95% CI      |         | Var.                                | 95% CI      |         |
| Random - Intercept                                                                                 | 0.46           | 0.22 - 1.53 |         | 0.26            | 0.12 - 0.88 |         | 0.40                                | 0.19 - 1.32 |         |
| Random - Slopes                                                                                    |                |             |         |                 |             |         |                                     |             |         |
| Recommendation at PCI hospital discharge (Ref. 1 month)                                            |                |             |         |                 |             |         |                                     |             |         |
| <12 months                                                                                         | 0.37           | 0.17 - 1.23 |         | 0.15            | 0.07 - 0.49 |         | 0.64                                | 0.31 - 2.15 |         |
| ≥12 months                                                                                         | 0.39           | 0.19 - 1.31 |         | 0.30            | 0.14 - 0.99 |         | 0.40                                | 0.19 - 1.33 |         |
| unknown                                                                                            | 1.97           | 0.93 - 6.58 |         | 0.66            | 0.31 - 2.18 |         | 2.09                                | 0.99 - 6.97 |         |
| Drug eluting stent                                                                                 | 0.10           | 0.05 - 0.33 |         | 0.17            | 0.08 - 0.57 |         | 0.08                                | 0.04 - 0.26 |         |
| ICC                                                                                                | 0.085          |             |         | 0.043           |             |         | 0.098                               |             |         |

Supplemental figure 1. Persistence with DAPT from discharge to 12 months by year of episode.

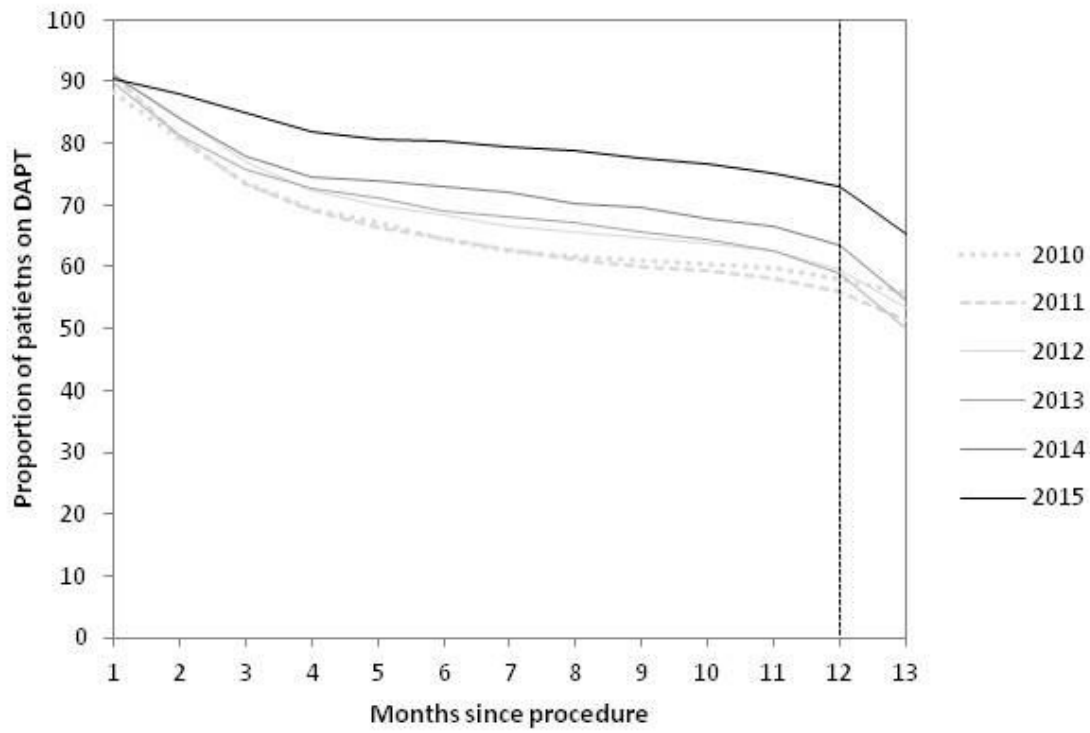

Supplemental figure 2. Antiplatelet agent taken at discharge by quarter of the index episode.

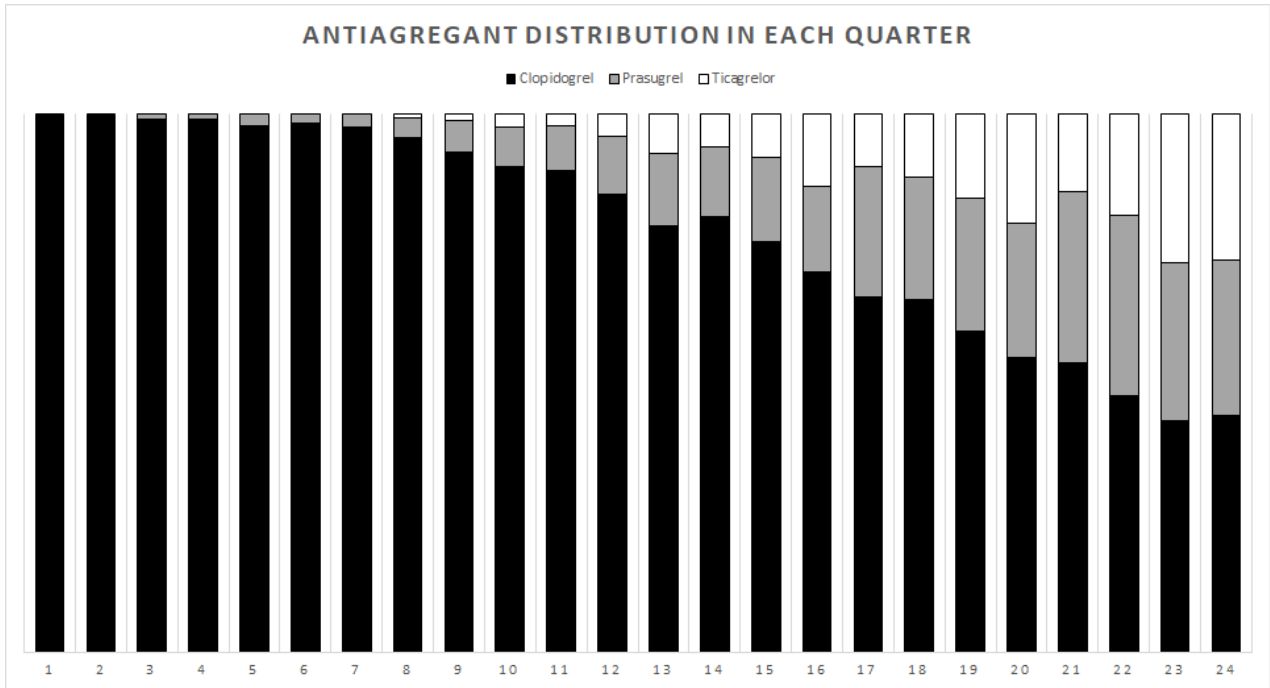

Peer review only

Supplemental figure 3. DAPT duration recommended in each hospital by year of episode



STROBE Statement—Checklist of items that should be included in reports of *cohort studies*

|                              | Item No | Recommendation                                                                                                                                                                                                                                                                                                         | Page num                              |
|------------------------------|---------|------------------------------------------------------------------------------------------------------------------------------------------------------------------------------------------------------------------------------------------------------------------------------------------------------------------------|---------------------------------------|
| <b>Title and abstract</b>    | 1       | (a) Indicate the study's design with a commonly used term in the title or the abstract                                                                                                                                                                                                                                 | 3<br>(Design)                         |
|                              |         | (b) Provide in the abstract an informative and balanced summary of what was done and what was found                                                                                                                                                                                                                    | 3                                     |
| <b>Introduction</b>          |         |                                                                                                                                                                                                                                                                                                                        |                                       |
| Background/rationale         | 2       | Explain the scientific background and rationale for the investigation being reported                                                                                                                                                                                                                                   | 6                                     |
| Objectives                   | 3       | State specific objectives, including any prespecified hypotheses                                                                                                                                                                                                                                                       | 7                                     |
| <b>Methods</b>               |         |                                                                                                                                                                                                                                                                                                                        |                                       |
| Study design                 | 4       | Present key elements of study design early in the paper                                                                                                                                                                                                                                                                | 7-8                                   |
| Setting                      | 5       | Describe the setting, locations, and relevant dates, including periods of recruitment, exposure, follow-up, and data collection                                                                                                                                                                                        | 7-8                                   |
| Participants                 | 6       | (a) Give the eligibility criteria, and the sources and methods of selection of participants. Describe methods of follow-up<br>(b) For matched studies, give matching criteria and number of exposed and unexposed                                                                                                      | 7-8                                   |
| Variables                    | 7       | Clearly define all outcomes, exposures, predictors, potential confounders, and effect modifiers. Give diagnostic criteria, if applicable                                                                                                                                                                               | 7-8                                   |
| Data sources/<br>measurement | 8*      | For each variable of interest, give sources of data and details of methods of assessment (measurement). Describe comparability of assessment methods if there is more than one group                                                                                                                                   | 7-8                                   |
| Bias                         | 9       | Describe any efforts to address potential sources of bias                                                                                                                                                                                                                                                              | 10-11                                 |
| Study size                   | 10      | Explain how the study size was arrived at                                                                                                                                                                                                                                                                              | 9                                     |
| Quantitative variables       | 11      | Explain how quantitative variables were handled in the analyses. If applicable, describe which groupings were chosen and why                                                                                                                                                                                           | 9                                     |
| Statistical methods          | 12      | (a) Describe all statistical methods, including those used to control for confounding<br>(b) Describe any methods used to examine subgroups and interactions<br>(c) Explain how missing data were addressed<br>(d) If applicable, explain how loss to follow-up was addressed<br>(e) Describe any sensitivity analyses | 10-11<br>10-11<br>13<br>13<br>12      |
| <b>Results</b>               |         |                                                                                                                                                                                                                                                                                                                        |                                       |
| Participants                 | 13*     | (a) Report numbers of individuals at each stage of study—eg numbers potentially eligible, examined for eligibility, confirmed eligible, included in the study, completing follow-up, and analysed<br>(b) Give reasons for non-participation at each stage<br>(c) Consider use of a flow diagram                        | 12<br>12<br>Fig 1                     |
| Descriptive data             | 14*     | (a) Give characteristics of study participants (eg demographic, clinical, social) and information on exposures and potential confounders<br>(b) Indicate number of participants with missing data for each variable of interest<br>(c) Summarise follow-up time (eg, average and total amount)                         | Tables 1,<br>2<br>Tables 1,<br>2<br>8 |
| Outcome data                 | 15*     | Report numbers of outcome events or summary measures over time                                                                                                                                                                                                                                                         | Fig 1                                 |

suppl

|    |                          |    |                                                                         |
|----|--------------------------|----|-------------------------------------------------------------------------|
| 1  |                          |    | suppl                                                                   |
| 2  | Main results             | 16 | (a) Give unadjusted estimates and, if applicable, confounder-adjusted   |
| 3  |                          |    | estimates and their precision (eg, 95% confidence interval). Make       |
| 4  |                          |    | clear which confounders were adjusted for and why they were             |
| 5  |                          |    | included                                                                |
| 6  |                          |    |                                                                         |
| 7  |                          |    | (b) Report category boundaries when continuous variables were           |
| 8  |                          |    | categorized                                                             |
| 9  |                          |    |                                                                         |
| 10 |                          |    | (c) If relevant, consider translating estimates of relative risk into   |
| 11 |                          |    | absolute risk for a meaningful time period                              |
| 12 | Other analyses           | 17 | Report other analyses done—eg analyses of subgroups and                 |
| 13 |                          |    | interactions, and sensitivity analyses                                  |
| 14 |                          |    | Table 3<br>suppl                                                        |
| 15 | <b>Discussion</b>        |    |                                                                         |
| 16 | Key results              | 18 | Summarise key results with reference to study objectives                |
| 17 |                          |    | 15                                                                      |
| 18 | Limitations              | 19 | Discuss limitations of the study, taking into account sources of        |
| 19 |                          |    | potential bias or imprecision. Discuss both direction and magnitude of  |
| 20 |                          |    | any potential bias                                                      |
| 21 |                          |    |                                                                         |
| 22 | Interpretation           | 20 | Give a cautious overall interpretation of results considering           |
| 23 |                          |    | objectives, limitations, multiplicity of analyses, results from similar |
| 24 |                          |    | studies, and other relevant evidence                                    |
| 25 |                          |    | 19-20                                                                   |
| 26 | Generalisability         | 21 | Discuss the generalisability (external validity) of the study results   |
| 27 |                          |    | 20                                                                      |
| 28 | <b>Other information</b> |    |                                                                         |
| 29 | Funding                  | 22 | Give the source of funding and the role of the funders for the present  |
| 30 |                          |    | study and, if applicable, for the original study on which the present   |
| 31 |                          |    | article is based                                                        |
| 32 |                          |    | 5                                                                       |

\*Give information separately for exposed and unexposed groups.

**Note:** An Explanation and Elaboration article discusses each checklist item and gives methodological background and published examples of transparent reporting. The STROBE checklist is best used in conjunction with this article (freely available on the Web sites of PLoS Medicine at <http://www.plosmedicine.org/>, Annals of Internal Medicine at <http://www.annals.org/>, and Epidemiology at <http://www.epidem.com/>). Information on the STROBE Initiative is available at <http://www.strobe-statement.org>.
